# Supplementary material for: A Long-read based Haplotype Panel Enhances Imputation and Discovery of Functional Small and Structural Variants
Source: Research Square preprint supplement (doi:10.21203/rs.3.rs-6312842/v1), 2025-04-10
Supplement: Supplementary file 2 [file 66f5f8293a995d4c737c1efd.xlsx]

## Sheet: Supplementary Data 1
Table S1. The benchmark and haplotype-resolved variant set of HG002 and LCL6.
Variant type	Count of heterozygous variants in benchmark set		Count of heterozygous variants in haplotype-resolved set
	HG0021	LCL6	HG002	LCL62
SNV	2117525	2030090	2360987	2029241
indel	326207	292553	492454	0
DEL	NA	4216	6671	3243
INS	NA	4618	9542	3126
1The benchmark SV set for HG002 on GRCh38 was not available.
2The haplotype-resolved set of LCL6 was generated from benchmark variant set using WhatsHap phasing in pedigree mode with parents’ data.

## Sheet: Supplementary Data 2
Table S2. The called and phased heterozygous variant counts per individual in a cohort with 945 Chinese samples.
Sample	Total het SNV	Phased het SNV	Total het indel	Phased het indel	Total het SV	Phased het SV	Total het DEL	Phased het DEL	Total het DUP	Phased het DUP	Total het INS	Phased het INS	Total het INV	Phased het INV
1	1990481	1834550	189623	73596	9946	8526	4278	3991	208	122	5410	4381	50	32
2	2000845	1775178	190702	75471	10287	8830	4496	4198	179	107	5552	4488	60	37
3	1987642	1815290	190008	77036	10270	8591	4457	4059	164	109	5594	4384	55	39
4	1989529	1856523	190979	76253	9862	8484	4332	4021	180	103	5275	4306	75	54
5	1995535	1828130	189415	71985	10373	8741	4416	4040	160	101	5722	4550	75	50
6	1992550	1821222	189600	75282	9985	8594	4392	4063	171	97	5373	4399	49	35
7	1991775	1883207	189680	72144	9999	8498	4372	4009	176	103	5400	4346	51	40
8	2000228	1846888	191634	78630	9553	8078	4148	3786	110	73	5233	4175	62	44
9	1995296	1854148	190325	77116	9966	8548	4407	4090	170	98	5340	4329	49	31
10	1958240	1857327	186504	72219	10358	8863	4523	4174	177	98	5599	4547	59	44
11	2010063	1868157	191162	73217	9475	8133	4225	3939	189	109	4999	4044	62	41
12	2008006	1858049	190749	76572	10515	9021	4517	4247	231	131	5707	4607	60	36
13	1985869	1842693	189899	77121	10317	8783	4588	4249	177	113	5494	4382	58	39
14	2006536	1873617	190391	74103	10434	8801	4547	4187	160	93	5687	4495	40	26
15	1985951	1842128	188881	75845	9496	7947	4032	3679	150	88	5262	4142	52	38
16	1995185	1852767	190606	76613	10221	8676	4432	4106	167	103	5565	4432	57	35
17	1994006	1853468	189049	74460	10342	8810	4493	4119	171	104	5623	4553	55	34
18	2004154	1855954	192439	77766	9601	8091	4194	3804	121	78	5244	4187	42	22
19	2001057	1797444	190725	75948	10001	8478	4385	4022	128	73	5436	4349	52	34
20	1981253	1818382	189409	73049	10069	8586	4422	4124	135	85	5457	4339	55	38
21	1996913	1854088	191072	75272	9976	8453	4359	4032	173	103	5391	4284	53	34
22	1975521	1815679	187563	67969	9976	8532	4420	4075	165	100	5329	4314	62	43
23	2006051	1799090	191527	75641	9797	8433	4365	4063	161	100	5203	4228	68	42
24	1984227	1816128	189966	74196	10125	8647	4429	4130	160	87	5472	4388	64	42
25	1981455	1814499	190437	76309	9854	8282	4245	3862	108	60	5437	4307	64	53
26	1992621	1911656	190092	74538	9964	8538	4382	4086	163	111	5356	4303	63	38
27	1449605	1335905	138352	56584	10274	8719	4519	4170	151	97	5536	4405	68	47
28	1981806	1803701	189586	74469	10346	8816	4487	4155	190	106	5622	4523	47	32
29	1972490	1822722	187696	73570	10701	9093	4659	4299	176	97	5801	4656	65	41
30	1997763	1847739	190939	79624	10058	8603	4447	4092	184	121	5378	4360	49	30
31	1989127	1891482	189796	69534	9623	8161	4236	3911	155	99	5188	4119	44	32
32	2013712	1831887	192875	73259	10106	8680	4518	4177	160	92	5377	4382	51	29
33	1973638	1835797	187821	72511	10554	9010	4649	4298	199	127	5652	4543	54	42
34	1983323	1789446	189679	72823	10281	8717	4440	4106	189	105	5602	4476	50	30
35	2011558	1803050	192658	77809	9739	8156	4186	3843	139	80	5359	4194	55	39
36	1998809	1913591	191034	71647	9674	8280	4340	4027	160	86	5111	4125	63	42
37	1989281	1818052	190349	72119	10450	8831	4542	4180	190	108	5664	4513	54	30
38	2001494	1829875	191515	74057	9897	8405	4302	3982	160	93	5378	4292	57	38
39	1992183	1788158	190250	75755	9749	8340	4330	3994	169	102	5201	4214	49	30
40	1994938	1824159	190470	79068	9518	8114	4183	3871	129	74	5149	4130	57	39
41	1984734	1827964	189449	71888	10294	8886	4580	4259	177	108	5473	4474	64	45
42	1981698	1894077	188804	69402	10164	8625	4458	4105	148	89	5507	4395	51	36
43	1990435	1822645	191047	73072	9867	8361	4317	3981	174	90	5329	4260	47	30
44	1995779	1898129	190312	69911	10283	8682	4347	3986	175	112	5716	4554	45	30
45	1988608	1827608	190097	73523	9377	7869	4002	3629	133	79	5197	4131	45	30
46	2016160	1846001	191468	75037	10138	8641	4441	4086	173	113	5472	4405	52	37
47	2009228	1759408	192274	72913	9951	8443	4341	4010	177	101	5377	4294	56	38
48	2003029	1827468	191097	76638	9773	8395	4316	3989	176	121	5231	4251	50	34
49	1995373	1784997	191081	74946	10092	8566	4306	3974	181	112	5549	4446	56	34
50	2009353	1732259	191729	76124	9744	8282	4310	3978	136	75	5257	4203	41	26
51	1995392	1844093	190683	72864	10453	8959	4396	4122	223	131	5779	4665	55	41
52	1998986	1833461	190541	69214	10097	8601	4377	4044	167	97	5482	4412	71	48
53	1974527	1788909	188949	71935	9968	8481	4364	4011	130	80	5426	4350	48	40
54	2006099	1790397	191831	73631	10036	8514	4504	4176	179	117	5293	4181	60	40
55	1999746	1852358	190497	71602	9825	8264	4284	3930	160	100	5323	4197	58	37
56	1988880	1804627	189952	72421	9690	8299	4317	4011	145	87	5171	4170	57	31
57	1985307	1763468	189411	76082	10221	8709	4440	4083	171	102	5564	4491	46	33
58	1987734	1766908	189539	76377	10119	8640	4458	4145	173	92	5429	4363	59	40
59	1994003	1762781	190542	77367	9933	8404	4318	3956	147	87	5422	4325	46	36
60	1992968	1800719	191775	75136	10032	8423	4358	3995	132	79	5481	4308	61	41
61	1981234	1891539	189979	70390	9939	8515	4482	4160	153	97	5244	4216	60	42
62	1985002	1889529	188993	68310	9855	8307	4248	3910	163	90	5389	4274	55	33
63	1989941	1895203	189981	69323	9889	8424	4354	4012	140	79	5343	4304	52	29
64	1995385	1894898	190823	71284	10164	8642	4499	4148	153	92	5460	4366	52	36
65	1991059	1763482	190052	75542	9652	8245	4209	3864	149	93	5226	4238	68	50
66	2012979	1830932	190601	68215	10204	8632	4393	4064	163	93	5592	4437	56	38
67	1985972	1756280	189892	74008	9975	8459	4355	4038	174	104	5391	4277	55	40
68	1977362	1729804	189517	78867	10076	8565	4268	3931	156	96	5591	4495	61	43
69	1981157	1787527	189800	71113	9778	8348	4360	4015	169	99	5197	4199	52	35
70	2021434	1850340	192245	75994	9981	8586	4453	4100	185	115	5290	4336	53	35
71	1985511	1810830	190087	74653	9986	8548	4412	4080	177	118	5347	4312	50	38
72	1991129	1820857	189711	74045	10642	9103	4531	4236	230	141	5822	4681	59	45
73	2016953	1808127	193018	72809	10281	8759	4579	4196	186	108	5468	4420	48	35
74	1972034	1746096	187307	73864	10818	9191	4608	4269	226	127	5942	4772	42	23
75	1989482	1890862	189179	69046	9529	8265	4232	3949	158	93	5083	4186	56	37
76	1988784	1713954	189707	78523	10946	9295	4753	4404	242	140	5904	4726	47	25
77	1989722	1749634	189227	73582	9966	8442	4456	4073	207	122	5254	4213	49	34
78	2000125	1812347	190848	80974	10047	8487	4325	3974	174	101	5487	4366	61	46
79	1994194	1797599	190516	71335	10248	8831	4446	4131	177	101	5562	4553	63	46
80	1986737	1809586	190057	72063	9817	8245	4270	3882	131	84	5372	4251	44	28
81	1978847	1823706	188882	70489	9910	8473	4428	4139	179	94	5256	4209	47	31
82	2006896	1908172	192095	70507	9678	8308	4258	3945	167	96	5201	4234	52	33
83	1997563	1891867	191516	68692	9940	8481	4417	4096	157	95	5304	4244	62	46
84	1998007	1894685	190663	70454	11782	8640	6063	4489	138	84	5534	4035	47	32
85	1998779	1757947	190939	77149	11405	8407	5813	4332	131	69	5401	3963	60	43
86	1992552	1829873	190258	70008	9447	7938	4056	3706	143	83	5191	4111	57	38
87	1984150	1822380	188686	69304	9986	8476	4330	3999	142	75	5465	4368	49	34
88	1974431	1808385	187567	70472	10518	8872	4547	4200	194	106	5712	4531	65	35
89	1995361	1822301	190639	72074	9866	8367	4405	4009	145	91	5274	4239	42	28
90	1991180	1782591	191225	71534	10256	8790	4454	4125	201	126	5544	4506	57	33
91	1970260	1743479	188447	72700	10200	8723	4452	4096	159	102	5526	4476	63	49
92	2006396	1828638	192090	70448	10017	8515	4424	4072	171	100	5356	4297	66	46
93	1996784	1819170	191109	72003	9741	8353	4305	3993	193	121	5188	4201	55	38
94	1987571	1791847	190261	81238	9481	8073	4262	3955	168	98	5005	3989	46	31
95	2024461	1855118	193114	71131	9971	8477	4416	4069	147	85	5351	4283	57	40
96	1994801	1766198	191078	72430	10291	8818	4496	4144	157	103	5595	4537	43	34
97	2006641	1843653	190766	72052	10802	9200	4618	4261	240	139	5883	4760	61	40
98	1985773	1822276	189902	74013	10006	8437	4334	3955	166	99	5445	4345	61	38
99	1983135	1817357	188988	73823	9651	8248	4160	3832	168	100	5263	4274	60	42
100	2023541	1827603	193954	74892	10107	8392	4270	3886	153	91	5630	4375	54	40
101	1998136	1834627	191452	72856	9978	8396	4418	4067	157	94	5342	4194	61	41
102	1986995	1837323	189847	72677	9979	8612	4482	4179	193	125	5244	4266	60	42
103	1991393	1775939	189371	74677	9916	8471	4373	4048	160	88	5319	4286	64	49
104	2000380	1808281	191378	78003	9959	8525	4452	4113	161	101	5292	4279	54	32
105	1972364	1759853	187449	74921	10689	9137	4602	4270	227	137	5807	4690	53	40
106	2001102	1825535	191538	73508	9776	8337	4291	3960	162	105	5253	4222	70	50
107	2013304	1825294	192570	77280	9769	8408	4410	4093	180	103	5123	4178	56	34
108	1981630	1816984	188552	75767	10734	9173	4451	4123	239	144	5987	4865	57	41
109	1998846	1831396	191712	73643	9510	8172	4190	3905	142	90	5129	4151	49	26
110	1996745	1763747	190880	79755	9830	8436	4354	4038	161	97	5265	4273	50	28
111	1990286	1816787	190401	79322	10237	8753	4530	4190	162	86	5486	4437	59	40
112	2010900	1789578	192277	74799	9898	8516	4411	4080	162	99	5263	4299	62	38
113	2008414	1871350	191644	73270	9976	8595	4354	4064	183	108	5391	4388	48	35
114	2006756	1862162	191879	79710	9779	8396	4272	3952	197	125	5256	4284	54	35
115	2002245	1871906	191996	77204	9955	8472	4412	4049	163	109	5322	4273	58	41
116	2000844	1840871	190909	74606	10222	8620	4395	4019	159	104	5611	4457	57	40
117	1936233	1779792	184495	74498	9978	8455	4465	4110	166	92	5294	4220	53	33
118	2006944	1807779	191367	80344	9946	8582	4369	4055	167	108	5347	4374	63	45
119	1994238	1855226	190334	76764	9808	8281	4259	3896	134	96	5369	4261	46	28
120	1967629	1821984	188491	73880	9651	8208	4290	3919	157	95	5144	4154	60	40
121	1997315	1781276	190496	74685	9603	8166	4181	3888	154	99	5209	4138	59	41
122	2002493	1850297	191250	79589	10682	9145	4591	4290	257	147	5772	4667	62	41
123	2020904	1901972	192963	76911	7773	6220	3260	2924	185	109	4278	3157	50	30
124	2017259	1870307	192149	75783	10071	8565	4437	4066	173	94	5407	4366	54	39
125	1988856	1847144	191052	76900	9858	8447	4315	4024	183	109	5303	4272	57	42
126	1978687	1832935	188966	78434	9727	8242	4236	3863	153	91	5292	4255	46	33
127	1993417	1844868	190468	79210	10851	9286	4640	4340	221	123	5938	4790	52	33
128	1990429	1825611	190599	79726	10157	8610	4431	4109	180	112	5487	4348	59	41
129	1977995	1836101	189123	74557	9857	8358	4235	3894	158	93	5421	4342	43	29
130	1999115	1851165	191833	80592	9661	8142	4246	3849	145	88	5216	4168	54	37
131	1972085	1821840	188467	74469	10887	9402	4672	4394	251	165	5907	4807	57	36
132	1992103	1808329	190494	72305	9985	8500	4236	3951	160	91	5517	4405	72	53
133	1977660	1843362	189153	75461	9818	8403	4298	3997	149	87	5315	4280	56	39
134	1977266	1819771	188412	74787	9995	8476	4346	4009	159	104	5440	4324	50	39
135	2003557	1809526	192045	80581	9755	8215	4269	3920	165	105	5269	4154	52	36
136	1988449	1893153	189292	72739	10255	8790	4477	4148	188	116	5524	4481	66	45
137	1990654	1894973	190783	74829	10533	9040	4500	4221	231	134	5737	4645	65	40
138	1989193	1852053	189837	78235	10038	8508	4439	4086	161	98	5394	4296	44	28
139	1993563	1832686	191656	80229	10184	8643	4391	4051	175	108	5562	4448	56	36
140	1992311	1784762	190431	86620	9940	8407	4415	4027	173	109	5306	4244	46	27
141	1965055	1803226	186885	78852	9885	8348	4134	3800	149	97	5546	4415	56	36
142	1992309	1862197	189472	78467	9962	8461	4329	3956	158	102	5415	4363	60	40
143	2016825	1832360	191887	74686	9627	8100	4213	3827	133	91	5236	4151	45	31
144	1967306	1791730	187704	79543	9474	7921	4124	3725	120	68	5178	4091	52	37
145	1976391	1842465	188337	76485	10266	8751	4486	4164	174	100	5548	4448	58	39
146	1998545	1909413	190825	72631	10387	8862	4576	4228	160	96	5581	4483	70	55
147	1998732	1852878	190246	78436	10161	8585	4357	4010	155	100	5590	4436	59	39
148	1984034	1897299	188801	76877	10400	8793	4425	4039	131	74	5795	4644	49	36
149	1977515	1801143	188514	75929	10233	8603	4386	3987	181	113	5614	4462	52	41
150	1948722	1820819	184271	71316	9780	8269	4265	3886	150	91	5307	4255	58	37
151	1992060	1846160	189038	71646	9728	8160	4288	3896	131	76	5261	4155	48	33
152	1979339	1894171	189016	71955	9430	7868	4099	3719	139	90	5140	4034	52	25
153	1984501	1839275	189556	71951	10136	8549	4481	4107	165	101	5439	4307	51	34
154	1994378	1834606	190599	72396	10718	9113	4587	4274	222	131	5862	4677	47	31
155	1999970	1850738	190286	70845	10657	9074	4571	4254	210	121	5824	4670	52	29
156	2018970	1875980	191991	74545	10736	9079	4580	4267	224	115	5883	4669	49	28
157	1998920	1852217	191508	73518	10758	9189	4648	4351	209	118	5843	4679	58	41
158	1977872	1835708	189592	78047	9667	8135	4189	3815	145	91	5290	4201	43	28
159	1992418	1854751	190433	73676	9588	7922	4198	3800	133	83	5207	4012	50	27
160	1991353	1858154	191339	73762	9112	7633	4009	3628	111	65	4945	3904	47	36
161	1995688	1858654	190488	71461	10232	8609	4415	4011	160	98	5598	4458	59	42
162	1988286	1898293	191152	73631	9927	8436	4381	4032	166	94	5335	4282	45	28
163	1998993	1828533	191181	75985	10028	8525	4361	4031	160	84	5452	4372	55	38
164	1999675	1818539	190872	76693	9941	8471	4358	4040	149	85	5377	4314	57	32
165	1991780	1845903	189914	73916	10416	8766	4531	4129	171	93	5661	4511	53	33
166	1997052	1810980	191612	75349	9820	8211	4310	3913	148	86	5309	4178	53	34
167	2000346	1850762	190884	72332	11147	9503	4763	4432	228	138	6097	4902	59	31
168	1996207	1811450	190961	78367	9701	8044	4185	3734	119	79	5352	4199	45	32
169	2019428	1873754	193174	76454	9821	8298	4344	3914	121	75	5303	4271	53	38
170	1981801	1839523	189546	74907	10471	8771	4504	4089	144	89	5755	4541	68	52
171	1979070	1819049	189731	77545	10660	8976	4521	4128	190	131	5899	4686	50	31
172	2002773	1807163	191798	80457	10486	8861	4491	4145	200	122	5745	4555	50	39
173	1992997	1833512	191309	75271	10788	9174	4570	4261	257	151	5905	4728	56	34
174	2012734	1823188	191892	75705	10917	9226	4551	4230	225	132	6086	4819	55	45
175	1996914	1798946	192383	75150	10885	9358	4648	4344	225	139	5952	4838	60	37
176	1982369	1837554	189045	72033	9720	8166	4217	3850	150	93	5300	4187	53	36
177	1972226	1824235	188120	74040	10403	8797	4507	4148	190	124	5650	4492	56	33
178	2007638	1908151	192110	71682	10061	8570	4365	4027	192	106	5461	4405	43	32
179	2006907	1876480	191946	76493	10246	8692	4413	4058	181	112	5599	4491	53	31
180	1992113	1852673	190397	74815	10122	8475	4325	3923	179	104	5573	4420	45	28
181	1993317	1796000	190561	80021	9975	8227	4304	3884	152	94	5467	4211	52	38
182	2009603	1834308	192470	82293	10358	8661	4486	4109	167	98	5660	4426	45	28
183	2006600	1836247	191248	81967	9672	8205	4231	3891	158	98	5228	4181	55	35
184	2014329	1850594	193216	80078	9816	8178	4317	3884	136	85	5298	4175	65	34
185	1995121	1887792	191202	70805	10384	8832	4521	4164	175	104	5637	4532	51	32
186	2012284	1811743	192668	79474	9963	8304	4264	3890	157	95	5481	4279	61	40
187	1993137	1762128	191104	78464	9907	8440	4463	4109	162	84	5218	4204	64	43
188	1994469	1857567	190972	74318	9575	8224	4293	3960	134	91	5088	4142	60	31
189	2011742	1853886	192975	78638	10005	8456	4346	3977	150	90	5463	4357	46	32
190	1980934	1845367	189905	79042	9910	8457	4344	4037	160	95	5347	4287	59	38
191	1995391	1847757	191610	79721	10188	8686	4447	4099	202	117	5482	4431	57	39
192	1981515	1893180	189393	70621	9817	8322	4221	3812	157	105	5385	4365	54	40
193	2009042	1803780	192185	79319	9590	8046	4180	3795	141	84	5221	4137	48	30
194	2000040	1841408	191322	76320	9540	7996	4110	3763	117	72	5256	4123	57	38
195	1981868	1851134	189559	78085	10047	8472	4414	4034	155	82	5431	4333	47	23
196	1997449	1815567	191274	75346	9586	8089	4236	3865	121	69	5182	4123	47	32
197	1978306	1790295	190055	75373	9974	8512	4495	4157	152	91	5274	4227	53	37
198	1973036	1837876	189152	71724	10205	8678	4436	4094	158	93	5564	4462	47	29
199	1976894	1780365	189175	76797	9519	8098	4241	3873	129	71	5109	4125	40	29
200	1997335	1818767	191417	75365	9545	7939	4222	3820	126	72	5153	4011	44	36
201	1987764	1798853	190153	73353	10045	8643	4450	4142	185	99	5352	4367	58	35
202	1992017	1745047	191270	72712	9544	8162	4271	3955	148	96	5066	4072	59	39
203	2004638	1808530	192290	79999	9476	8203	4328	4051	157	103	4944	4013	47	36
204	2006609	1813900	192046	75444	9929	8472	4433	4091	175	104	5262	4233	59	44
205	2015183	1871832	192576	75887	9421	8021	4164	3848	160	104	5048	4043	49	26
206	1998537	1821965	191167	73391	9770	8206	4278	3897	140	83	5296	4185	56	41
207	2008656	1834744	192189	75404	9698	8334	4369	4077	169	107	5102	4109	58	41
208	2000199	1809559	192134	76308	9907	8506	4437	4124	170	108	5247	4233	53	41
209	2008144	1827095	192132	71700	9985	8450	4467	4090	167	103	5298	4226	53	31
210	2005512	1836484	192298	74814	10979	9359	4733	4357	203	136	6001	4838	42	28
211	2004868	1852557	191371	75290	10080	8620	4454	4119	165	90	5403	4376	58	35
212	2022343	1839395	193687	80000	9745	8295	4241	3933	178	105	5268	4225	58	32
213	1998720	1795535	191023	77451	9715	8341	4373	4019	134	82	5140	4191	68	49
214	1998539	1854473	192033	74640	9681	8337	4255	3949	173	104	5193	4242	60	42
215	1991485	1762353	190647	73054	9940	8531	4389	4034	179	127	5313	4331	59	39
216	2037756	1912211	196119	72900	10030	8596	4382	4079	188	110	5404	4368	56	39
217	1993812	1805901	190945	78257	10079	8616	4388	4049	150	92	5488	4436	53	39
218	2011812	1822842	192525	88321	10339	8823	4471	4119	195	119	5622	4550	51	35
219	1996196	1813643	191582	73317	10018	8553	4381	4032	172	108	5408	4371	57	42
220	1996937	1852891	190320	72598	9818	8389	4297	3993	154	95	5310	4263	57	38
221	1991161	1859161	190637	72022	9454	7990	4167	3819	148	97	5093	4045	46	29
222	1976290	1808919	188696	71874	10785	9209	4618	4282	224	133	5894	4764	49	30
223	1983876	1788290	189623	70677	10513	9078	4500	4210	203	134	5759	4698	51	36
224	1988441	1789570	190269	72053	9984	8444	4452	4084	184	121	5302	4202	46	37
225	2000908	1801357	191343	70202	9838	8385	4289	3945	165	111	5332	4294	52	35
226	1993662	1827333	190856	75113	9296	7746	3975	3608	144	93	5093	3994	84	51
227	1991151	1801912	190015	75260	9508	8093	4129	3770	145	86	5175	4200	59	37
228	1994761	1776182	190445	69975	9777	8398	4339	4014	164	112	5218	4234	56	38
229	2007239	1820204	192182	71608	9425	7985	4166	3799	152	96	5048	4050	59	40
230	1965819	1769819	188175	71500	9805	8363	4321	3959	150	89	5293	4292	41	23
231	2017908	1826157	192660	76738	10742	9172	4587	4279	205	115	5910	4752	40	26
232	2011037	1856029	191164	71449	9856	8458	4397	4067	157	99	5265	4265	37	27
233	1993841	1832613	190541	72898	10877	9223	4592	4262	232	142	6000	4788	53	31
234	1998306	1833118	191005	70842	9206	7882	4110	3779	162	97	4884	3971	50	35
235	1991679	1823973	189987	69634	9888	8544	4374	4074	174	99	5284	4331	56	40
236	1985041	1803668	189394	68034	9886	8421	4365	4074	158	92	5303	4219	60	36
237	1976250	1779920	188785	70236	10740	9285	4681	4394	238	157	5765	4701	56	33
238	1984533	1683268	189528	72864	10459	8858	4478	4128	204	123	5719	4565	58	42
239	1995842	1740990	190686	72801	10273	8782	4473	4152	207	139	5533	4450	60	41
240	1975295	1775362	189678	73003	9787	8396	4340	4023	177	111	5218	4226	52	36
241	1983492	1798226	190050	74673	10001	8531	4286	3975	199	122	5453	4390	63	44
242	1997502	1814000	190944	73666	9931	8424	4298	3953	146	90	5427	4338	60	43
243	2000181	1856419	190430	73658	10025	8589	4347	4017	156	91	5462	4440	60	41
244	1988674	1812459	190507	71694	9979	8556	4398	4073	184	106	5348	4344	49	33
245	1974007	1760604	186957	72103	10129	8684	4443	4134	177	96	5445	4405	64	49
246	2001741	1835987	191386	71226	10903	9311	4638	4326	216	120	5988	4820	61	45
247	1999473	1820302	190391	71872	9696	8316	4322	3999	149	95	5175	4188	50	34
248	2000345	1833586	190287	74446	9520	8174	4242	3904	138	92	5096	4146	44	32
249	1993422	1840087	190314	73672	10184	8659	4393	4028	172	91	5556	4498	63	42
250	1972200	1802015	188000	72991	9944	8504	4344	4035	159	90	5380	4337	61	42
251	1993328	1847807	188934	70795	9242	7809	4141	3793	144	92	4910	3892	47	32
252	3078978	2552029	295666	163925	10455	8928	4594	4253	166	97	5649	4547	46	31
253	2002262	1848747	191427	72893	9761	8430	4319	4034	175	118	5213	4235	54	43
254	1993528	1811981	189878	75232	9932	8485	4460	4087	157	99	5270	4269	45	30
255	2009105	1845280	191056	71141	9244	7786	4115	3744	143	92	4943	3928	43	22
256	1990835	1837271	189848	70407	9747	8367	4255	3943	161	102	5282	4289	49	33
257	2048078	1812264	200854	83951	9814	8347	4322	3980	152	90	5286	4253	54	24
258	1989365	1787766	188878	73159	9810	8282	4291	3936	141	82	5321	4234	57	30
259	1989567	1842928	189579	76710	9528	8166	4229	3944	188	114	5049	4065	62	43
260	2004828	1835796	191539	77844	11237	9525	4791	4466	231	141	6161	4878	54	40
261	2004505	1833338	192130	70754	10032	8657	4429	4136	161	101	5388	4382	54	38
262	1999795	1837695	190052	70241	9626	8374	4294	3996	158	100	5118	4236	56	42
263	1994652	1835521	190653	72297	9826	8253	4244	3861	146	91	5379	4260	57	41
264	2017985	1847323	193866	70894	9123	7743	4026	3688	123	73	4928	3950	46	32
265	1988859	1833408	189423	73420	9037	7661	4021	3687	130	85	4826	3847	60	42
266	1986414	1812978	190305	70628	9525	8163	4273	3964	136	80	5055	4081	61	38
267	2005194	1838535	191596	70162	10861	9171	4641	4331	220	128	5957	4687	43	25
268	1996732	1807476	190306	70368	9805	8292	4252	3881	155	99	5345	4278	53	34
269	1993779	1887127	190754	66645	10113	8684	4397	4099	191	108	5472	4443	53	34
270	1986021	1820342	190078	70720	9377	8015	4059	3780	155	92	5113	4111	50	32
271	1985191	1866440	190207	68902	9276	7972	4131	3845	147	88	4949	4003	49	36
272	1984861	1843311	190129	69759	9681	8307	4339	4022	141	89	5147	4158	54	38
273	1967247	1648764	188449	130004	10782	9187	4607	4288	232	131	5881	4727	62	41
274	1970818	1704201	189129	76570	9372	7947	4145	3822	119	70	5042	4006	66	49
275	1977483	1797969	189960	73367	9606	8218	4209	3902	168	103	5166	4172	63	41
276	2014121	1864258	192791	73540	9660	8339	4286	4005	171	102	5138	4190	65	42
277	1985576	1898190	189050	73151	9916	8473	4366	4011	148	83	5352	4343	50	36
278	1997392	1825301	191123	74757	9627	8220	4230	3904	151	91	5200	4188	46	37
279	2010307	1719985	192858	76590	9378	7987	4155	3816	127	79	5044	4055	52	37
280	1998007	1807880	190941	73128	9608	8154	4221	3890	148	87	5182	4139	57	38
281	1989253	1819845	190391	73234	9712	8202	4299	3939	131	81	5222	4147	60	35
282	1992763	1820220	190845	71882	9812	8137	4107	3735	136	72	5510	4294	59	36
283	2016673	1850902	193613	72848	10381	8700	4496	4090	136	82	5702	4499	47	29
284	1985090	1734740	190777	73498	10029	8468	4386	4001	152	92	5442	4333	49	42
285	1993437	1819115	190924	72725	10371	8916	4587	4243	186	122	5548	4519	50	32
286	1996358	1799799	191081	71881	9733	8248	4315	3958	146	84	5211	4168	61	38
287	1993759	1831066	190053	72082	9975	8459	4347	3987	165	96	5402	4331	61	45
288	2011028	1844291	192926	71733	9751	8265	4252	3909	141	94	5297	4224	61	38
289	1999052	1829804	190798	70323	9868	8385	4295	3944	150	99	5360	4300	63	42
290	1984277	1795559	189314	68433	9961	8562	4315	3995	161	98	5425	4429	60	40
291	1987751	1815941	190488	71324	9585	8121	4224	3877	135	83	5167	4115	59	46
292	1985510	1801907	189284	71029	9418	7971	4131	3778	147	90	5096	4070	44	33
293	2013709	1862300	191906	70112	10110	8723	4448	4152	194	125	5418	4418	50	28
294	1998385	1812405	190128	75248	10338	8595	4517	4093	125	81	5645	4387	51	34
295	2012898	1800259	193114	77314	11062	9354	4735	4388	222	143	6038	4784	67	39
296	1983484	1780780	189412	74784	9717	8284	4167	3855	159	100	5339	4292	52	37
297	1962060	1746242	187231	70611	9144	7740	4052	3709	112	78	4902	3905	78	48
298	1991886	1774572	189324	74808	9805	8325	4311	3970	141	91	5300	4231	53	33
299	2009501	1822641	192316	71108	10231	8753	4414	4107	184	115	5580	4488	53	43
300	1976298	1772969	189378	71219	9774	8175	4321	3933	151	92	5254	4117	48	33
301	2008404	1909459	192796	71660	9383	7874	4117	3741	134	74	5082	4023	50	36
302	2006732	1839502	192513	71377	10397	8748	4536	4147	167	90	5645	4483	49	28
303	2002163	1795903	192066	79544	9928	8458	4407	4061	162	96	5294	4255	65	46
304	1938399	1775547	184557	71838	9990	8462	4314	3970	157	100	5467	4354	52	38
305	1993031	1806169	191499	76071	10286	8616	4389	4010	160	91	5690	4486	47	29
306	2007923	1843521	192578	77779	10153	8550	4432	4061	168	100	5498	4355	55	34
307	1992661	1843249	190733	71766	9628	8057	4218	3842	145	92	5213	4088	52	35
308	1981835	1827248	189347	70342	10090	8505	4425	4061	159	92	5452	4320	54	32
309	1994507	1831223	191823	72853	9912	8393	4302	3955	191	111	5363	4284	56	43
310	1998727	1839500	191252	71663	10498	8960	4669	4339	174	100	5594	4481	61	40
311	2019603	1864456	193705	75674	10035	8585	4380	4070	162	83	5421	4379	72	53
312	2016030	1848195	191978	72942	10331	8719	4436	4051	180	106	5656	4516	59	46
313	2004714	1833358	191701	74939	10115	8538	4364	3996	175	101	5527	4406	49	35
314	2009430	1855373	190862	72449	10352	8335	4354	3833	121	65	5823	4402	54	35
315	2009696	1823982	192376	74486	9904	8308	4238	3866	136	87	5490	4323	40	32
316	1989816	1816041	190222	82623	9656	8140	4244	3884	140	79	5219	4149	53	28
317	1974104	1823260	188296	71551	9668	8311	4317	3969	143	92	5153	4208	55	42
318	2003078	1835826	190248	78482	10252	8746	4461	4090	167	98	5568	4521	56	37
319	2002654	1797485	190368	69136	9592	8061	4178	3827	157	95	5199	4098	58	41
320	1976772	1838218	188782	70332	10132	8587	4457	4078	132	85	5479	4379	64	45
321	1998644	1799788	191133	71489	10118	8683	4436	4093	170	106	5464	4452	48	32
322	1995486	1767686	190130	72293	10292	8743	4579	4212	192	114	5459	4375	62	42
323	2002939	1778508	190897	75109	10171	8746	4463	4120	149	90	5500	4498	59	38
324	1996048	1790202	189793	72956	10144	8620	4404	4048	177	100	5503	4429	60	43
325	2002144	1837804	190304	73797	10295	8751	4515	4127	194	119	5534	4472	52	33
326	1995303	1814943	190244	72562	10200	8690	4486	4145	179	89	5472	4415	63	41
327	1979219	1823792	188645	71857	9909	7822	4324	3743	161	72	5365	3965	59	42
328	1970513	1775755	187588	71654	10421	8870	4576	4217	194	125	5595	4487	56	41
329	1994251	1830587	190027	72437	10378	8762	4517	4134	177	104	5625	4485	59	39
330	1992915	1842179	190538	74311	10415	8830	4613	4275	195	99	5554	4424	53	32
331	1991551	1815228	189960	73826	9422	7952	4084	3734	122	68	5164	4113	52	37
332	1989847	1857034	189995	71269	9557	8103	4201	3833	136	87	5165	4147	55	36
333	1985222	1806142	189592	77231	9928	8518	4417	4077	160	102	5302	4310	49	29
334	1994532	1781356	189999	71407	9688	8345	4252	3952	141	84	5237	4274	58	35
335	1995720	1840364	191418	74375	10264	8698	4447	4118	157	87	5603	4448	57	45
336	2014619	1855972	192028	75313	10124	8720	4495	4164	186	119	5385	4402	58	35
337	2005332	1850900	191600	75715	9800	8392	4308	4016	173	110	5270	4232	49	34
338	1994834	1827244	190776	73333	10447	8901	4575	4209	174	102	5646	4556	52	34
339	2036630	1870724	194196	74879	10021	8596	4454	4080	158	101	5361	4377	48	38
340	1987278	1830480	188642	73095	10409	8799	4506	4159	189	109	5663	4493	51	38
341	2015103	1849445	192149	74248	10156	8639	4459	4097	144	75	5505	4425	48	42
342	2010233	1860954	191283	73712	10455	8916	4581	4284	212	120	5602	4478	60	34
343	2003546	1849130	190414	74492	9613	8203	4281	3954	170	104	5117	4118	45	27
344	1990578	1831816	189296	70685	10826	9227	4661	4343	206	117	5909	4733	50	34
345	1978144	1781936	188432	71360	10031	8540	4382	4017	187	114	5397	4368	65	41
346	2013822	1837829	191714	72301	9720	6426	4231	2865	157	61	5291	3468	41	32
347	2018080	1840245	191985	72430	9566	7886	4108	3670	111	69	5290	4112	57	35
348	1973205	1884282	187826	67871	10055	8456	4399	3995	169	104	5428	4319	59	38
349	1985354	1823625	189029	73436	11103	9468	4652	4335	228	132	6168	4956	55	45
350	1988782	1826987	190132	71187	10561	8933	4600	4183	160	100	5733	4598	68	52
351	1884473	1660702	179808	74578	9646	8026	4166	3764	131	82	5303	4151	46	29
352	1858824	1681270	176848	68490	10386	8819	4659	4228	169	92	5502	4459	56	40
353	2007915	1832624	191956	76466	9891	8444	4374	4031	150	87	5316	4291	51	35
354	2009482	1829332	190405	74091	10217	8700	4442	4091	180	100	5548	4480	47	29
355	2005661	1783559	190584	72280	10134	8651	4434	4108	170	94	5489	4419	41	30
356	2021447	1827037	191403	74249	10192	8489	4365	3976	117	63	5648	4408	62	42
357	1996215	1812826	190150	79248	10324	8711	4488	4098	197	121	5588	4459	51	33
358	1967271	1769683	187576	71947	9898	8318	4284	3920	150	84	5409	4283	55	31
359	1990239	1822050	190030	71425	10067	8504	4427	4086	159	90	5418	4293	63	35
360	1968059	1791577	188436	75649	10229	8711	4448	4117	184	103	5541	4449	56	42
361	2000774	1829659	190281	70670	10323	8732	4506	4146	161	93	5616	4464	40	29
362	1980558	1824188	189389	71368	10433	8826	4518	4124	182	108	5678	4561	55	33
363	1993506	1816700	189648	84820	9891	8348	4257	3906	179	97	5403	4308	52	37
364	2005793	1784486	191970	77689	10230	8751	4474	4163	176	97	5527	4457	53	34
365	2004493	1862876	190914	72857	10300	8650	4515	4135	164	105	5563	4368	58	42
366	1970126	1776957	187551	71662	10250	8545	4380	3971	140	89	5680	4452	50	33
367	1999519	1757686	190309	75518	10258	8504	4390	3988	147	80	5661	4392	60	44
368	1984593	1809953	189420	80564	9577	8045	4171	3831	131	70	5217	4106	58	38
369	1995059	1824006	190445	74879	10094	8456	4324	3954	185	111	5529	4353	56	38
370	1995046	1825217	189586	72556	10201	8593	4442	4073	145	72	5542	4391	72	57
371	1986100	1814314	189093	71490	10893	9186	4725	4382	235	117	5886	4657	47	30
372	1994267	1778046	190098	73982	10234	8629	4408	4042	192	105	5579	4448	55	34
373	2003191	1821887	190707	70858	10045	8361	4447	4029	118	75	5433	4224	47	33
374	1979701	1790713	189024	70471	9946	8456	4304	3967	181	116	5399	4324	62	49
375	1988348	1815970	189860	72129	9225	7897	4084	3747	136	87	4940	4021	65	42
376	2013434	1837521	192403	75021	10057	8501	4360	3996	160	95	5481	4373	56	37
377	1998364	1835181	191455	70875	9839	8385	4340	4042	166	101	5260	4191	73	51
378	1977432	1793998	188635	73289	10477	8876	4615	4236	178	100	5625	4500	59	40
379	1979842	1886081	188602	70015	9774	8347	4286	3972	169	101	5273	4248	46	26
380	2003999	1787137	191256	73449	10106	8701	4478	4181	172	102	5399	4370	57	48
381	1983017	1823449	189498	70844	9965	8546	4419	4078	147	89	5338	4345	61	34
382	1991269	1816278	189923	68458	9858	8452	4351	4024	158	102	5291	4287	58	39
383	1978396	1794522	189213	71294	9680	8303	4317	3994	153	93	5163	4187	47	29
384	1977168	1806793	189226	72020	10090	8519	4460	4096	165	109	5408	4270	57	44
385	2004084	1839658	191459	73542	9419	7927	4137	3757	162	98	5041	4021	79	51
386	1992236	1823470	189947	75086	9573	8187	4258	3967	170	106	5085	4070	60	44
387	1991641	1804937	190312	74103	9969	8369	4473	4067	149	80	5291	4182	56	40
388	1993789	1827179	190909	77191	10357	8662	4388	4023	154	97	5775	4516	40	26
389	1998968	1855761	190900	74995	9980	8428	4236	3902	187	116	5505	4372	52	38
390	1975140	1783347	188288	76424	10033	8452	4379	4006	149	89	5468	4332	37	25
391	1996554	1822077	190275	72313	9768	8173	4190	3818	130	77	5392	4236	56	42
392	1981723	1805552	189197	71757	10063	8519	4420	4059	146	88	5452	4338	45	34
393	1991791	1798163	190081	71454	9819	8421	4309	3999	152	80	5309	4306	49	36
394	1993693	1770239	190823	74370	10022	8517	4383	4037	154	87	5431	4356	54	37
395	1975331	1751598	188618	72045	9691	8366	4299	3997	155	99	5176	4239	61	31
396	1979217	1806590	189239	70977	9635	8143	4152	3832	140	76	5282	4197	61	38
397	1995330	1807407	190937	72112	9759	8382	4289	3949	137	83	5269	4301	64	49
398	1987817	1792919	190226	72470	10072	8509	4340	4004	206	120	5465	4341	61	44
399	1998845	1832399	191064	71627	10118	8502	4402	4021	159	83	5497	4353	60	45
400	1987071	1827824	189437	71398	10051	8530	4305	3948	136	85	5556	4465	54	32
401	1976511	1769917	188910	74340	9698	8316	4371	4039	155	94	5117	4153	55	30
402	1908485	1714996	182053	73483	9511	8167	4294	3970	156	92	5015	4074	46	31
403	2013771	1844840	192881	74122	10008	8497	4387	4032	163	107	5398	4316	60	42
404	1985430	1806763	190301	74782	9799	8324	4340	4018	165	97	5238	4181	56	28
405	2012842	1836595	191702	74833	9963	8524	4399	4087	168	94	5336	4301	60	42
406	1998277	1799767	190512	75914	9549	8149	4202	3891	170	94	5124	4127	53	37
407	1964423	1774592	188048	72282	9987	8474	4355	4009	167	98	5408	4336	57	31
408	1983166	1777729	189401	73870	9903	8512	4440	4136	182	113	5235	4237	46	26
409	1968368	1733064	188104	76973	10035	8597	4453	4102	164	102	5360	4354	58	39
410	1990806	1807528	191164	72408	9923	8383	4336	3947	154	98	5370	4298	63	40
411	2007473	1819975	192756	73370	10175	8644	4441	4109	177	101	5514	4400	43	34
412	2012036	1825152	192888	74925	10059	8608	4412	4117	152	100	5432	4353	63	38
413	2006535	1827255	190968	74256	10777	9113	4549	4251	249	137	5923	4687	56	38
414	1986320	1812479	189591	71645	10268	8726	4490	4129	182	115	5541	4449	55	33
415	2000019	1768621	190500	72245	10075	8614	4426	4105	182	114	5414	4359	53	36
416	2003596	1771275	191195	72953	9328	7653	4060	3644	133	87	5083	3885	52	37
417	1988772	1776777	190400	82389	9586	8029	4173	3814	157	95	5210	4088	46	32
418	1969764	1835772	188136	70606	9962	8417	4356	4013	155	96	5398	4270	53	38
419	1987234	1802786	189594	73429	9957	8361	4268	3916	140	81	5487	4326	62	38
420	1997636	1844266	191027	74310	9885	8356	4294	3950	127	82	5412	4289	52	35
421	1987667	1801873	189449	71857	10105	8496	4451	4078	132	84	5458	4294	64	40
422	1967512	1789761	187952	71970	9921	8294	4385	3990	136	87	5337	4177	63	40
423	1962106	1792450	187393	72043	9640	8226	4222	3893	140	80	5228	4221	50	32
424	1985698	1815961	189337	73789	9893	8308	4324	3955	140	84	5370	4235	59	34
425	2016851	1848107	192189	73073	9966	8484	4455	4122	145	87	5314	4236	52	39
426	1974294	1796824	188435	73670	10052	8565	4503	4131	154	97	5342	4299	53	38
427	2020118	1826003	192204	74258	9251	7812	4049	3690	136	90	5014	3993	52	39
428	1991178	1834976	190088	73514	9728	8240	4240	3889	125	66	5297	4239	66	46
429	2007656	1857781	192013	72893	10127	8593	4431	4076	161	84	5493	4402	42	31
430	1975536	1803702	188425	73279	9680	8177	4201	3814	106	79	5316	4243	57	41
431	2007462	1850527	192137	73713	10067	8401	4485	4016	136	79	5386	4269	60	37
432	1995147	1818162	191005	74326	9948	8451	4349	4023	170	109	5363	4274	66	45
433	2003049	1860630	190652	73448	9895	8457	4381	4021	161	96	5309	4310	44	30
434	1988592	1864156	189411	72490	9881	8437	4369	4030	170	100	5282	4269	60	38
435	2023327	1881515	192927	75381	10007	8429	4313	3936	132	81	5514	4376	48	36
436	2003695	1830144	190841	71776	9861	8306	4309	3968	150	89	5348	4210	54	39
437	1988446	1769024	190152	78383	9682	8182	4279	3928	148	85	5200	4133	55	36
438	2006604	1746888	192170	78616	9771	8269	4223	3883	166	95	5333	4257	49	34
439	1990361	1838297	190664	78797	9906	8409	4398	4016	157	81	5299	4268	52	44
440	1982339	1804616	189601	77628	9791	8317	4354	3991	147	81	5229	4203	61	42
441	1977231	1798541	188246	74815	10750	9175	4539	4268	228	135	5930	4735	53	37
442	1989251	1854315	189835	73600	10047	8565	4361	3997	154	91	5472	4439	60	38
443	1993060	1802993	190560	77749	9749	8321	4344	3976	165	99	5185	4205	55	41
444	2005707	1737667	191047	76698	10272	8630	4452	4074	162	94	5587	4415	71	47
445	1991661	1793224	190614	81641	9885	8320	4275	3943	149	83	5409	4260	52	34
446	1980114	1711706	189161	75583	9645	8214	4340	3985	148	91	5105	4110	52	28
447	2012493	1861441	191658	72368	9886	8498	4385	4068	177	113	5256	4261	68	56
448	2002902	1830012	190695	77808	9658	8236	4206	3899	167	108	5230	4191	55	38
449	1987410	1751427	189686	87981	9564	8214	4178	3870	135	89	5187	4212	64	43
450	2008352	1736676	191676	93347	9833	8553	4377	4085	181	97	5222	4334	53	37
451	1997989	1812616	190419	80855	9251	7871	4037	3724	148	91	4998	4014	68	42
452	1995115	1818159	191254	79510	9525	8118	4242	3902	158	101	5067	4083	58	32
453	2015384	1840482	192498	74573	9683	8235	4251	3911	130	82	5245	4202	57	40
454	1991567	1840964	190715	72510	9728	8184	4225	3848	133	80	5313	4221	57	35
455	2003928	1852089	192838	77247	9747	8231	4223	3828	144	92	5315	4262	65	49
456	2009505	1833166	191988	73836	9727	8152	4321	3920	144	88	5219	4122	43	22
457	1977242	1827396	189172	76450	10139	8598	4482	4109	151	89	5457	4364	49	36
458	2013738	1834323	193276	80504	9781	8273	4287	3934	139	78	5297	4226	58	35
459	1989161	1767617	190186	80780	9849	8481	4365	4043	168	102	5261	4296	55	40
460	2013859	1813253	192962	81668	9855	8434	4268	3979	137	78	5402	4341	48	36
461	1999803	1802502	192128	79186	9367	7867	4083	3710	123	71	5108	4050	53	36
462	2000899	1780807	192341	89809	9159	7696	3985	3637	154	95	4973	3937	47	27
463	2026270	1811883	194778	79032	10073	8603	4437	4088	160	93	5408	4374	68	48
464	2006617	1826616	192849	77784	9920	8414	4338	3955	152	87	5384	4340	46	32
465	1958143	1801280	186839	71643	9772	8334	4283	3981	158	97	5278	4222	53	34
466	1984463	1835653	189693	74470	9999	8545	4333	3996	149	92	5464	4418	53	39
467	1998892	1841888	191329	75504	9939	8391	4254	3911	158	84	5480	4362	47	34
468	2017254	1846076	193360	78097	9896	8321	4271	3872	159	99	5428	4325	38	25
469	2007507	1820716	191945	79757	9673	8181	4329	3978	132	85	5155	4083	57	35
470	1981276	1880777	189213	70300	10158	8597	4540	4174	141	84	5421	4300	56	39
471	1991275	1793360	190663	76095	9681	8254	4370	4020	149	84	5106	4117	56	33
472	1988123	1787913	189797	74238	9709	8226	4257	3928	156	94	5242	4171	54	33
473	2005933	1825998	191863	76482	9873	8398	4276	3952	151	75	5380	4328	66	43
474	1996282	1756737	190761	82521	9698	8153	4232	3848	144	87	5273	4189	49	29
475	1978395	1785724	190042	75355	9558	7992	4287	3893	127	76	5097	3988	47	35
476	1992000	1901147	190441	70048	10078	8239	4461	3894	156	98	5409	4210	52	37
477	2006010	1803884	192225	75937	9961	8522	4376	4037	206	124	5322	4327	57	34
478	1994246	1790827	190118	80307	9725	8303	4268	3918	153	95	5238	4245	66	45
479	1994586	1793874	189697	77487	9916	8431	4372	4005	144	85	5347	4296	53	45
480	1973750	1769784	189651	78725	9975	8499	4401	4044	155	101	5362	4316	57	38
481	1974343	1794283	189347	75656	9601	8132	4132	3802	148	93	5262	4198	59	39
482	1987638	1809283	191089	76096	9933	8478	4399	4043	163	94	5317	4307	54	34
483	1967624	1789406	188860	74178	10069	8568	4484	4125	160	98	5380	4314	45	31
484	1996686	1792823	191665	85883	9550	8119	4222	3895	169	105	5109	4085	50	34
485	1973179	1783175	189806	93102	9522	8092	4257	3883	136	77	5086	4100	43	32
486	1991944	1818873	190956	76771	9851	8432	4312	3994	140	81	5342	4320	57	37
487	2002521	1854311	191222	73441	10199	8770	4462	4169	168	85	5521	4479	48	37
488	1995708	1821713	192050	75791	9308	7911	4141	3806	159	102	4957	3970	51	33
489	1985410	1805502	189916	75998	9514	7990	4237	3864	154	85	5069	4007	54	34
490	1984115	1798132	190053	80202	9678	8300	4309	3987	151	90	5164	4192	54	31
491	1995086	1788285	191640	78588	9575	8311	4327	4032	165	101	5032	4151	51	27
492	1984978	1799628	190496	77116	9791	8395	4387	4086	175	101	5176	4171	53	37
493	1975678	1821738	188392	70510	10036	8465	4477	4056	159	106	5341	4263	59	40
494	1994555	1786984	191222	77984	9585	8099	4247	3859	133	79	5147	4115	58	46
495	1992361	1776728	190967	81198	9412	7902	4021	3664	111	72	5230	4131	50	35
496	1986057	1810136	190184	73500	10125	8599	4391	4034	174	106	5490	4407	70	52
497	1993367	1825474	192197	74421	10043	8440	4355	3988	141	82	5489	4331	58	39
498	1981604	1809676	188822	73605	9728	8300	4250	3895	152	92	5283	4287	43	26
499	1984115	1788463	190270	77333	9523	7899	4004	3619	113	71	5361	4185	45	24
500	1988476	1775571	190031	81039	9661	8078	4195	3783	134	92	5267	4159	65	44
501	2018650	1820222	193638	77342	9589	8094	4198	3835	118	75	5221	4149	52	35
502	1982049	1779674	189037	71379	9773	8308	4249	3955	173	102	5294	4223	57	28
503	2012162	1780445	193291	78134	10286	8616	4417	4001	146	84	5665	4487	58	44
504	2002491	1822251	192564	81580	11437	8836	5265	4280	161	103	5963	4416	48	37
505	1967937	1773898	188483	70903	11700	8874	5306	4229	154	92	6184	4516	56	37
506	1994175	1826608	191137	71486	10258	8669	4533	4128	139	99	5539	4414	47	28
507	1975617	1767810	189021	76415	10278	8657	4457	4066	175	102	5581	4444	65	45
508	1988448	1802859	190244	78303	9954	8565	4398	4068	136	83	5367	4380	53	34
509	2002100	1848954	191644	74630	10174	8686	4507	4162	177	109	5429	4378	61	37
510	2010980	1819566	193435	80347	10074	8713	4471	4115	158	88	5398	4479	47	31
511	2002986	1811897	191938	78831	10457	8891	4535	4176	158	96	5688	4563	76	56
512	1991427	1789947	191108	76331	9839	8320	4367	4014	157	86	5260	4180	55	40
513	2003175	1818081	192595	74858	9926	8284	4289	3847	119	73	5456	4320	62	44
514	2012524	1791314	192855	79844	9912	8297	4376	4004	146	86	5330	4168	60	39
515	1986766	1818252	190116	73677	10335	8596	4403	3978	149	87	5714	4484	69	47
516	1984654	1802936	190099	74048	8983	7454	3898	3515	123	81	4880	3793	82	65
517	2021472	1908778	193290	70548	10475	8707	4522	4063	167	104	5737	4506	49	34
518	1998858	1818799	191167	75113	9931	8333	4338	3961	174	98	5368	4239	51	35
519	1981589	1776499	190459	72912	10231	8717	4452	4112	205	127	5525	4444	49	34
520	1962865	1788496	187776	73425	10172	8685	4442	4146	155	95	5514	4403	61	41
521	1994420	1787981	190700	77090	9892	8378	4420	4067	166	92	5244	4176	62	43
522	1988364	1799952	190431	77439	9854	8341	4326	3950	134	94	5323	4252	71	45
523	1973699	1793291	189510	79199	10904	9266	4658	4316	230	130	5960	4775	56	45
524	1984247	1767557	189597	79790	10113	8493	4398	4030	158	92	5489	4319	68	52
525	1998782	1819767	191837	77271	9935	8189	4332	3939	167	97	5379	4120	57	33
526	1997659	1896579	191264	74392	10188	8619	4515	4158	179	114	5443	4312	51	35
527	2001278	1812343	191898	77015	9683	8066	4212	3787	131	85	5292	4161	48	33
528	2012992	1905960	192590	70918	10157	8473	4371	3992	149	83	5581	4367	56	31
529	2001452	1825890	191539	74596	10348	8683	4481	4118	166	96	5648	4439	53	30
530	2007196	1909832	192543	72049	9560	8047	4225	3861	125	75	5156	4080	54	31
531	1981663	1813450	190243	72572	9904	8373	4344	3993	150	92	5353	4254	57	34
532	1979697	1874019	189201	70698	9625	8129	4223	3840	179	114	5163	4131	60	44
533	2017880	1801563	193047	77652	10064	8443	4410	4019	162	99	5442	4295	50	30
534	1995808	1898727	190910	70275	10173	8535	4387	4009	163	89	5563	4389	60	48
535	2013679	1915607	192259	71190	10192	8513	4451	4061	168	103	5511	4311	62	38
536	1972171	1779637	188721	75153	9901	8271	4635	4134	122	81	5083	4012	61	44
537	2016477	1914666	193444	70626	9258	7762	4430	3944	114	75	4628	3676	86	67
538	2006276	1805609	191027	75118	10294	8672	4681	4224	153	91	5401	4313	59	44
539	1987445	1759558	190312	80636	10190	8675	4402	4093	164	94	5579	4456	45	32
540	1973109	1880154	188285	70595	9972	8416	4256	3912	157	92	5508	4374	51	38
541	1997098	1824072	191638	76366	9584	8147	4191	3841	131	85	5216	4192	46	29
542	1989538	1838186	189920	69558	9669	8068	4213	3834	138	91	5268	4113	50	30
543	2008971	1792360	191761	83848	10006	8395	4370	3974	140	95	5442	4288	54	38
544	1987294	1760010	190452	80715	9469	8161	4259	3947	151	87	5002	4088	57	39
545	1991559	1754412	190649	79463	10097	8447	4392	3989	142	81	5519	4348	44	29
546	2011771	1794212	191968	79288	9294	7802	4079	3716	125	77	5033	3975	57	34
547	2001295	1819386	190922	81034	9475	8091	4221	3862	127	73	5080	4119	47	37
548	1979973	1782940	188653	76454	9510	8144	4230	3938	162	87	5061	4082	57	37
549	2003491	1811526	191615	76132	10177	8522	4399	4002	160	94	5559	4386	59	40
550	1986665	1819952	189131	74154	9602	8008	4176	3799	132	85	5242	4088	52	36
551	1994146	1811988	190959	74555	10008	8343	4276	3888	163	88	5503	4319	66	48
552	1982931	1805434	189299	74529	9967	8479	4443	4089	149	99	5305	4238	70	53
553	1977173	1813291	188650	72424	8987	7618	3982	3672	126	78	4836	3837	43	31
554	1964472	1831595	188573	72499	9916	8389	4262	3918	142	93	5455	4341	57	37
555	1985150	1893055	189245	73906	9697	8158	4290	3907	133	68	5220	4146	54	37
556	1972142	1777242	188572	74932	9783	8247	4331	3972	152	103	5250	4139	50	33
557	1991953	1815504	190280	76331	9838	8267	4209	3848	157	102	5423	4279	49	38
558	2008755	1828768	192180	77148	9824	8293	4286	3926	134	80	5343	4255	61	32
559	1974820	1785773	188870	73898	9668	8189	4247	3906	152	86	5216	4166	53	31
560	2015633	1915910	192498	71927	9410	7927	4147	3797	138	86	5073	4012	52	32
561	1999161	1893178	191418	71146	9931	8381	4279	3920	149	90	5456	4341	47	30
562	1999509	1809886	190634	81842	10448	8822	4429	4081	159	97	5792	4597	68	47
563	1980349	1878649	187812	71882	9744	8165	4280	3900	149	99	5272	4134	43	32
564	1984851	1819828	188669	74536	10558	8920	4550	4209	193	111	5755	4557	60	43
565	1993915	1786815	191611	74835	10392	8744	4515	4124	168	102	5668	4492	41	26
566	1978712	1816227	189492	74841	11133	9416	4680	4321	218	125	6175	4925	60	45
567	2005487	1831829	191429	77078	10524	8863	4526	4139	169	110	5778	4575	51	39
568	1993591	1780283	190480	77446	10730	8955	4577	4174	169	100	5931	4642	53	39
569	1979654	1823947	190271	75057	10202	8596	4477	4096	146	97	5516	4354	63	49
570	1998351	1817742	190689	77233	10206	8612	4517	4131	151	93	5482	4352	56	36
571	1984237	1803655	190025	75686	9786	8225	4230	3836	139	80	5365	4271	52	38
572	2004379	1803097	191726	78966	10124	8328	4339	3905	137	99	5586	4281	62	43
573	2000936	1893110	191605	71638	10242	8669	4372	4011	177	112	5642	4511	51	35
574	1992638	1847013	190701	74667	10978	9250	4679	4339	244	143	6005	4728	50	40
575	1995904	1843205	191093	77937	9934	8370	4298	3967	154	90	5430	4282	52	31
576	2003322	1751439	190689	73908	11107	9376	4692	4356	232	125	6125	4861	58	34
577	1987578	1842594	189833	74746	10545	8886	4556	4165	159	85	5777	4594	53	42
578	1999431	1837571	191021	78099	10827	9226	4581	4284	223	130	5969	4776	54	36
579	2003516	1905879	191853	73112	11033	9327	4711	4385	216	119	6047	4785	59	38
580	2015155	1853440	192548	76545	10057	8326	4278	3905	155	86	5564	4297	60	38
581	2001682	1794647	190548	77875	10722	9186	4621	4310	226	118	5825	4728	50	30
582	1971754	1775123	188299	76518	10634	9017	4535	4229	222	124	5816	4630	61	34
583	1992535	1764152	190073	78413	10366	8663	4523	4094	150	90	5644	4444	49	35
584	2002814	1827134	190567	74353	11062	9299	4791	4468	212	121	6005	4679	54	31
585	1982478	1800420	189335	77250	10350	8690	4535	4133	168	102	5596	4420	51	35
586	2002260	1842299	191482	75120	9524	7846	4166	3792	127	75	5182	3950	49	29
587	2001991	1839992	190584	74041	10978	9314	4600	4294	249	146	6088	4851	41	23
588	1997682	1828118	190441	74520	10166	8650	4423	4065	185	115	5512	4439	46	31
589	1978740	1823916	189038	77898	9811	8198	4269	3865	133	86	5346	4208	63	39
590	1985007	1804034	190565	71810	10185	8445	4422	3976	137	83	5558	4341	68	45
591	1975119	1788362	189492	76170	9754	8067	4205	3780	132	80	5369	4174	48	33
592	2019762	1863177	193557	75236	9853	8227	4222	3851	141	86	5436	4253	54	37
593	1988284	1811320	190077	75856	10139	8643	4445	4094	150	105	5487	4399	57	45
594	1983947	1806879	189920	75958	10332	8601	4423	4010	176	108	5673	4439	60	44
595	1980170	1794880	188432	75859	10081	8448	4392	4016	168	105	5460	4288	61	39
596	1994835	1818427	190436	76230	10378	8743	4527	4163	184	119	5615	4426	52	35
597	2007430	1810524	192698	80961	10265	8662	4389	4029	161	94	5658	4502	57	37
598	2002048	1818774	190658	72049	10662	8894	4610	4194	177	98	5820	4561	55	41
599	1999228	1861062	190788	74082	11014	9342	4677	4349	208	126	6067	4821	62	46
600	2004392	1845755	191016	76612	10396	8693	4432	4032	174	106	5735	4519	55	36
601	1981861	1831408	189397	76322	10457	8825	4548	4158	165	98	5693	4540	51	29
602	1968789	1802630	188496	76318	10474	8849	4587	4196	160	103	5675	4512	52	38
603	1991372	1839436	190589	75863	10377	8749	4453	4127	155	93	5704	4482	65	47
604	1994294	1833688	189916	77986	10926	9289	4728	4424	251	146	5894	4680	53	39
605	1993405	1812677	189481	76626	11044	9354	4727	4398	224	141	6038	4779	55	36
606	2006761	1815363	191860	73635	9855	8328	4300	3910	129	97	5374	4280	52	41
607	1993100	1832161	190496	75870	10908	9271	4626	4297	233	139	5999	4796	50	39
608	1996680	1832372	190981	76470	10539	8894	4559	4201	179	123	5753	4533	48	37
609	2012776	1839411	191453	73591	10518	8928	4567	4191	162	94	5727	4603	62	40
610	1994089	1832703	191283	78961	10312	8754	4518	4161	164	91	5566	4460	64	42
611	1984567	1900160	189351	76901	9319	7880	4185	3830	136	82	4945	3932	53	36
612	1994108	1833679	190663	75603	10099	8571	4369	4027	190	109	5480	4399	60	36
613	1990551	1823378	190743	78786	10030	8467	4345	3978	160	98	5466	4344	59	47
614	2003261	1841604	191289	79682	10286	8549	4492	4054	171	106	5563	4352	60	37
615	1990149	1795501	189921	80909	10041	8433	4382	4004	151	87	5449	4302	59	40
616	2002270	1852211	191968	77679	10803	9137	4609	4275	224	130	5907	4684	63	48
617	1984672	1829004	190446	77141	10333	8761	4584	4232	174	103	5521	4388	54	38
618	2002966	1853603	192205	77495	9995	8396	4354	3978	154	102	5412	4272	75	44
619	2030175	1861874	193901	78428	10250	8725	4484	4136	172	105	5535	4444	59	40
620	2018681	1842456	192053	72954	10501	8913	4531	4218	166	94	5742	4567	62	34
621	2004992	1839524	192175	76718	11155	9462	4775	4435	242	139	6075	4846	63	42
622	1995979	1824206	190992	76789	10502	8867	4601	4241	173	100	5666	4483	62	43
623	2012074	1828709	192618	78374	10405	8670	4516	4089	141	92	5691	4455	57	34
624	1984890	1764732	189923	84111	10505	8782	4495	4106	155	96	5798	4542	57	38
625	1994435	1819536	191056	76357	10355	8617	4453	4041	142	93	5713	4453	47	30
626	2011114	1828744	192159	78118	9743	8319	4310	3948	140	83	5237	4252	56	36
627	2004967	1840600	191602	77166	10015	8447	4295	3922	163	97	5491	4385	66	43
628	1995914	1796633	189981	77723	10280	8696	4458	4116	174	108	5588	4431	60	41
629	2000712	1798473	191610	78996	9629	8275	4272	3952	149	100	5151	4183	57	40
630	2009150	1802735	192302	84964	10397	8867	4529	4153	173	105	5636	4563	59	46
631	1996363	1813660	190459	77363	9466	8091	4218	3883	147	93	5053	4079	48	36
632	1993012	1815035	190290	79721	9953	8366	4355	3987	165	87	5374	4254	59	38
633	2007354	1852247	191014	76491	9878	8469	4351	4018	176	112	5292	4297	59	42
634	1987662	1812750	190018	79491	10320	8731	4520	4180	169	99	5575	4415	56	37
635	2004337	1855051	191441	76146	9983	8402	4350	3978	157	103	5425	4286	51	35
636	2008908	1848308	192285	77549	10297	8697	4521	4137	163	103	5567	4423	46	34
637	1986992	1825489	189756	79245	10227	8507	4430	4042	167	107	5564	4318	66	40
638	1985937	1805330	189458	79168	9788	8257	4351	3945	155	91	5231	4188	51	33
639	2002133	1817082	191736	81161	10466	8851	4584	4213	195	115	5626	4484	61	39
640	1994388	1809003	190898	80415	9839	8340	4290	3972	175	97	5322	4232	52	39
641	1986129	1807573	190125	79615	10090	8530	4462	4128	161	86	5406	4273	61	43
642	1998024	1844121	191643	71409	9994	8511	4358	4021	167	100	5411	4351	58	39
643	1970760	1801341	188113	76728	10392	8815	4510	4156	175	92	5659	4530	48	37
644	1960977	1777413	187325	76447	9870	8390	4381	4029	170	105	5270	4220	49	36
645	1992999	1799189	189641	77472	9720	8185	4183	3857	173	106	5310	4191	54	31
646	2004164	1845929	191128	73718	9481	8084	4206	3861	147	81	5067	4099	61	43
647	1993244	1802010	190858	82440	10022	8513	4343	3994	184	114	5438	4365	57	40
648	1970095	1815978	188118	78848	9922	8410	4363	4027	164	90	5329	4251	66	42
649	1978357	1815019	190381	78372	9982	8491	4378	4002	145	87	5408	4367	51	35
650	1999770	1827038	191296	78956	10826	9259	4652	4338	228	148	5897	4744	49	29
651	2012678	1814007	193655	82844	10327	8701	4552	4183	174	111	5527	4363	74	44
652	1982071	1794316	190024	79820	10431	8671	4717	4264	170	109	5486	4252	58	46
653	1982052	1820627	190384	72659	10512	8848	4733	4262	154	100	5575	4451	50	35
654	2005590	1823328	192289	79457	9573	8045	4237	3839	143	98	5143	4078	50	30
655	2009425	1913060	192822	72930	10175	8637	4411	4073	147	81	5556	4447	61	36
656	1992694	1801971	190593	81275	10485	8897	4672	4287	173	109	5585	4466	55	35
657	1992482	1787766	190785	80874	10635	8967	4677	4284	190	116	5705	4525	63	42
658	2017381	1838840	193200	81063	10502	8826	4618	4205	173	100	5656	4484	55	37
659	1973011	1804570	188897	76555	10971	9037	4859	4318	185	120	5877	4571	50	28
660	2010931	1918557	192986	72498	10031	8400	4307	3925	189	108	5491	4342	44	25
661	1986176	1794643	190134	78459	10723	8939	4726	4233	166	100	5768	4567	63	39
662	2005470	1836127	191660	77877	10112	8241	4477	3892	120	76	5438	4219	77	54
663	1981876	1883504	189277	71489	10225	8625	4431	4074	158	86	5584	4431	52	34
664	1983300	1801840	190030	72076	10052	8448	4389	3988	156	89	5454	4339	53	32
665	2001352	1811911	191387	76521	10233	8737	4559	4175	167	103	5446	4422	61	37
666	1980357	1811989	189318	76617	9887	8360	4345	3979	160	106	5332	4241	50	34
667	2011479	1845252	192741	77438	9874	8272	4334	3912	168	114	5331	4220	41	26
668	1996790	1813763	190858	77270	8941	7514	3994	3638	130	88	4767	3758	50	30
669	1991711	1789888	191050	77094	10045	8442	4468	4053	142	96	5378	4257	57	36
670	2012140	1843643	193540	76538	10319	8653	4605	4219	155	96	5506	4293	53	45
671	2009976	1911547	191970	71223	10072	8399	4396	3929	148	93	5481	4348	47	29
672	1999778	1911683	191411	71228	10205	8652	4471	4138	212	128	5465	4346	57	40
673	1982259	1883291	188261	69042	10105	8633	4441	4130	190	118	5419	4351	55	34
674	2007133	1814425	191371	79490	9575	8150	4260	3902	152	97	5101	4103	62	48
675	1988062	1802954	190429	76912	9969	8298	4363	3930	165	91	5385	4241	56	36
676	1997926	1837427	189864	73663	9738	8145	4311	3895	141	82	5234	4131	52	37
677	1998652	1820392	191880	77871	9681	8181	4294	3935	150	99	5183	4109	54	38
678	2009750	1843546	191444	76327	9838	8229	4246	3850	173	112	5356	4229	63	38
679	1989601	1816236	191256	77283	10213	8571	4394	4019	164	108	5595	4402	60	42
680	1982973	1810534	189999	78942	10120	8496	4404	4032	151	89	5516	4340	49	35
681	2000900	1843210	192062	77509	9754	8225	4322	3946	139	83	5231	4153	62	43
682	2002256	1847740	191128	76890	10408	8729	4491	4127	187	112	5671	4449	59	41
683	2009690	1845924	192885	76621	9458	7840	4253	3827	119	62	5030	3917	56	34
684	1994728	1829906	190706	76746	10105	8553	4439	4079	171	109	5436	4326	59	39
685	1997647	1820289	190901	77937	10025	8526	4403	4066	162	95	5408	4326	52	39
686	1998927	1823457	190968	80663	9876	8355	4442	4112	139	70	5239	4134	56	39
687	1989097	1846297	190005	75740	9589	8042	4210	3820	132	78	5186	4109	61	35
688	1975337	1810933	188521	75045	9910	8195	4305	3888	127	78	5417	4188	61	41
689	2007683	1836000	192300	78373	10294	8588	4548	4118	146	97	5544	4337	56	36
690	2005578	1833679	191490	77880	11192	9488	4763	4433	239	129	6128	4885	62	41
691	2014570	1804859	192384	79875	9514	7954	4229	3816	129	75	5105	4036	51	27
692	1982924	1830155	190339	76866	9255	7750	4118	3706	126	78	4946	3919	65	47
693	2005295	1912494	191746	72243	9850	8244	4299	3916	150	85	5333	4199	68	44
694	2007086	1819307	192452	77693	10130	8579	4464	4075	149	88	5464	4383	53	33
695	1984565	1793452	190461	76452	11063	9445	4708	4420	210	124	6088	4864	57	37
696	1991022	1810137	190830	76082	10130	8455	4477	4036	124	77	5469	4299	60	43
697	1975399	1808629	188036	75666	10122	8535	4376	4023	160	105	5519	4363	67	44
698	1989035	1844380	190081	76126	10989	9333	4783	4464	242	140	5912	4691	52	38
699	2006728	1809211	191233	77354	10011	8477	4319	3950	168	108	5467	4377	57	42
700	1970049	1795766	188440	75958	10115	8588	4484	4126	159	105	5419	4321	53	36
701	1999000	1832203	190853	75758	9970	8417	4381	4046	150	96	5391	4247	48	28
702	1995664	1823676	190786	74926	10192	8497	4477	4060	150	89	5509	4309	56	39
703	1996608	1814225	190930	76981	10123	8522	4397	4048	169	103	5502	4330	55	41
704	1982398	1810270	189377	73310	10790	9207	4655	4366	220	134	5857	4679	58	28
705	1978150	1778827	190282	77347	11005	9320	4712	4405	240	136	5988	4739	65	40
706	1973484	1763741	188679	76093	10744	9109	4606	4306	233	129	5852	4640	53	34
707	1973457	1812828	188386	77664	10488	8761	4710	4227	138	95	5589	4402	51	37
708	2000516	1803054	190274	78407	10690	8844	4698	4235	151	89	5796	4491	45	29
709	1979013	1890481	189701	71796	10830	8926	4711	4200	158	100	5903	4589	58	37
710	1987003	1801326	189571	76359	10198	8631	4425	4058	171	112	5548	4423	54	38
711	1978721	1806743	188367	78303	10203	8658	4469	4094	172	109	5504	4412	58	43
712	1980690	1796426	188364	83474	9914	8371	4420	4044	139	89	5290	4191	65	47
713	1994268	1800485	189905	83704	10152	8580	4497	4122	186	115	5416	4307	53	36
714	1997942	1787099	189969	85584	10368	8786	4519	4152	173	104	5612	4481	64	49
715	1999295	1813424	191134	79500	10302	8655	4537	4189	202	112	5509	4323	54	31
716	1979662	1795044	188997	75227	10718	9018	4872	4394	163	89	5637	4501	46	34
717	1993040	1889471	190119	71746	10500	8754	4716	4211	143	96	5605	4428	36	19
718	1996388	1834303	190420	77122	10109	8486	4486	4043	132	80	5439	4329	52	34
719	1848729	1752820	175917	65767	10281	8704	4414	4069	185	116	5633	4487	49	32
720	1966432	1814029	187187	69029	9850	8328	4281	3926	161	97	5356	4264	52	41
721	2010175	1658807	192421	133353	9872	8359	4316	3959	157	104	5345	4265	54	31
722	1977622	1697664	189036	136312	10310	8614	4495	4081	135	91	5630	4411	50	31
723	1977120	1681051	189057	134874	9631	8192	4210	3869	154	90	5210	4194	57	39
724	1998073	1788927	190633	78708	10974	9387	4633	4347	244	140	6039	4858	58	42
725	1977477	1783859	188970	74952	10184	8475	4438	4041	172	106	5510	4284	64	44
726	2004645	1776593	192063	79416	10118	8404	4354	3952	149	87	5558	4327	57	38
727	2002160	1681633	191310	135303	10388	8650	4489	4096	149	73	5699	4447	51	34
728	1987770	1682906	190664	136115	10045	8491	4446	4079	152	86	5393	4285	54	41
729	2007006	1687256	192345	135864	9708	8114	4254	3874	135	77	5267	4130	52	33
730	1988011	1660806	190704	134947	10001	8409	4364	3977	170	102	5412	4296	55	34
731	1962107	1882415	187518	71114	10382	8739	4542	4152	197	109	5587	4438	56	40
732	1985800	1820867	189718	78055	10382	8783	4577	4189	164	91	5589	4464	52	39
733	2015700	1835546	193180	81749	10145	8536	4381	3988	164	116	5554	4401	46	31
734	2021268	1878476	192832	77171	10293	8684	4483	4138	154	91	5600	4416	56	39
735	1995975	1805498	190363	79510	9909	8241	4285	3888	144	83	5428	4238	52	32
736	2021120	1839387	194631	78761	9853	8252	4265	3881	138	87	5401	4251	49	33
737	1995564	1841315	191251	74471	10104	8519	4476	4052	158	99	5410	4335	60	33
738	2019458	1813489	193801	77758	9696	8116	4364	3946	148	90	5128	4037	56	43
739	2007222	1820975	191679	76040	9869	8364	4384	4019	147	88	5295	4223	43	34
740	1981560	1777743	189751	76918	10084	8434	4528	4101	162	107	5331	4192	63	34
741	2001670	1842018	192123	77257	9447	7982	4174	3794	129	84	5088	4070	56	34
742	2016159	1865782	192598	75280	9462	7895	4177	3805	127	83	5086	3966	72	41
743	1998361	1828044	191000	76130	8926	7438	4034	3630	117	75	4709	3691	66	42
744	1996249	1832967	190732	76716	9416	7963	4186	3833	153	95	5034	4006	43	29
745	1988438	1821804	189293	77160	10158	8554	4396	4019	157	91	5536	4399	69	45
746	1997469	1803480	190563	80612	10999	9451	4707	4415	215	125	6014	4864	63	47
747	1990246	1822029	189898	77391	9853	8341	4334	3998	164	103	5306	4207	49	33
748	1976235	1791928	188687	75753	10335	8657	4344	4038	229	130	5701	4450	61	39
749	1999386	1901753	191222	72289	10118	6514	4306	2857	151	73	5611	3543	50	41
750	2008344	1830555	191660	79021	10034	6576	4464	3059	184	96	5317	3373	69	48
751	2002609	1908862	191410	75170	10425	6714	4553	3019	153	95	5660	3551	59	49
752	1980159	1811926	189871	78827	10105	8441	4326	3939	141	88	5586	4377	52	37
753	2010177	1915254	192158	72093	10267	8458	4456	4029	143	86	5614	4312	54	31
754	1983772	1873155	190434	74925	9849	8248	4278	3884	135	85	5387	4243	49	36
755	1977114	1867459	190412	71266	10065	6463	4432	2969	153	70	5416	3372	64	52
756	1976507	1874838	189343	73360	9947	6508	4325	2936	166	93	5396	3428	60	51
757	1983372	1806210	189601	80177	10140	6704	4428	3043	149	79	5504	3534	59	48
758	1989784	1841087	189156	75080	9638	6255	4192	2814	112	55	5287	3353	47	33
759	2007808	1842250	192588	79414	10242	8707	4503	4153	162	105	5504	4406	73	43
760	1982716	1839283	189811	75637	9794	8351	4347	3981	126	81	5257	4240	64	49
761	2007427	1844268	192160	80253	10816	9188	4741	4358	171	109	5844	4682	60	39
762	2003566	1861754	191401	75892	9469	8008	4099	3766	158	101	5158	4106	54	35
763	1955454	1788874	186537	80583	10145	8589	4496	4137	149	91	5449	4329	51	32
764	2004992	1851434	191802	75746	10249	8689	4448	4112	194	118	5543	4418	64	41
765	2016591	1859442	192168	74348	10264	8561	4478	4056	144	86	5593	4385	49	34
766	1995313	1810118	190977	76741	10408	8656	4487	4096	170	104	5681	4410	70	46
767	2019834	1932261	193717	81865	9921	8196	4283	3898	146	97	5432	4158	60	43
768	2002195	1839809	192043	79007	10148	8594	4501	4141	159	104	5428	4305	60	44
769	1969944	1785916	188429	77768	10100	8564	4321	3949	164	107	5561	4469	54	39
770	2007049	1910319	192485	72723	10136	8557	4430	4047	145	95	5500	4378	61	37
771	1990759	1812165	190258	79988	9937	8297	4306	3928	152	76	5431	4260	48	33
772	1999527	1833409	191672	81040	9596	8070	4228	3891	141	87	5181	4062	46	30
773	2005618	1820299	192232	78051	9976	8439	4394	4058	176	112	5335	4220	71	49
774	2000219	1803814	191449	79503	10196	8457	4388	3981	158	86	5591	4353	59	37
775	1980265	1811896	189345	73193	11024	9315	4705	4355	228	148	6033	4776	58	36
776	2005950	1870502	191463	72253	9948	8438	4392	4021	144	84	5346	4290	66	43
777	1973565	1814673	189053	73831	11039	9435	4800	4417	211	132	5964	4845	64	41
778	1991498	1820804	190732	77303	9900	8314	4328	3934	156	93	5363	4253	53	34
779	2002535	1819460	192016	80740	10804	9190	4600	4272	204	130	5941	4740	59	48
780	1970645	1799497	188561	78323	10890	9163	4584	4253	233	140	6016	4732	57	38
781	1999517	1825586	191422	81531	10870	9203	4623	4282	211	150	5978	4736	58	35
782	2010344	1850582	193030	77757	9420	7910	4179	3819	138	91	5044	3956	59	44
783	1980353	1813958	190016	75854	10286	8735	4569	4189	173	109	5488	4403	56	34
784	1976406	1873885	189582	72113	9853	8338	4241	3910	165	106	5383	4281	64	41
785	1990270	1800529	190604	77561	10133	8603	4432	4103	170	98	5468	4354	63	48
786	2029524	1849218	193721	79067	9737	8211	4252	3898	177	105	5253	4170	55	38
787	1998755	1862508	190246	71257	10140	8712	4434	4129	156	97	5489	4444	61	42
788	1994340	1816491	190615	77862	9572	8116	4289	3934	149	93	5087	4052	47	37
789	2009072	1830300	191735	80021	10546	8972	4672	4305	170	99	5646	4522	58	46
790	2004515	1848540	191506	75669	9777	8248	4273	3947	143	82	5312	4191	49	28
791	1993348	1839240	190467	74870	10557	9043	4528	4223	226	144	5744	4638	59	38
792	1993596	1840081	190016	76464	9912	8404	4342	4018	155	88	5361	4271	54	27
793	2005368	1828359	192185	76340	9574	8084	4136	3821	166	97	5212	4122	60	44
794	2016763	1916112	193326	74985	11108	9443	4755	4419	221	116	6068	4866	64	42
795	2014187	1846336	192702	81192	9781	8220	4265	3855	130	93	5333	4232	53	40
796	1993105	1836459	190404	74638	9794	8247	4307	3931	150	90	5287	4197	50	29
797	2009183	1837676	192810	78005	9966	8371	4282	3910	150	90	5474	4331	60	40
798	1999429	1748660	191615	75320	9847	8248	4312	3915	143	89	5346	4222	46	22
799	2002786	1816265	191953	77925	10329	8673	4497	4103	174	109	5604	4423	54	38
800	1983142	1829468	189377	74860	10110	8487	4442	4059	159	102	5455	4288	54	38
801	1997794	1847364	190885	75254	9686	8172	4287	3902	142	92	5207	4141	50	37
802	1983111	1833309	190317	79789	10045	8387	4421	3996	141	82	5425	4274	58	35
803	2014256	1852693	191151	75665	9517	8001	4223	3845	165	104	5075	4014	54	38
804	2006013	1908434	191509	71526	10084	8535	4452	4074	160	90	5411	4318	61	53
805	1976922	1810206	188396	74827	10237	8638	4436	4064	163	96	5586	4441	52	37
806	1990923	1821422	191238	79145	11107	9349	4691	4356	238	130	6124	4823	54	40
807	1987338	1883652	190122	71125	9912	8395	4322	3981	153	98	5385	4275	52	41
808	1966447	1868957	187721	69096	10239	8674	4435	4063	154	97	5576	4458	74	56
809	1978586	1833173	188879	70064	9964	8408	4302	3932	171	109	5434	4330	57	37
810	1980051	1885115	189039	70167	10113	8493	4373	3987	189	111	5497	4358	54	37
811	1995589	1825548	190987	74076	10208	8658	4469	4104	180	123	5506	4395	53	36
812	2014259	1827109	192220	76136	10324	8688	4482	4104	173	112	5595	4420	74	52
813	2009202	1811403	191133	78291	10203	8637	4430	4079	185	117	5524	4394	64	47
814	1981134	1827738	189550	75532	10224	8582	4388	4046	170	115	5614	4387	52	34
815	1993060	1809285	189900	77905	11130	9413	4674	4332	230	126	6175	4923	51	32
816	2002833	1848121	192548	75568	9624	8168	4296	3940	150	97	5117	4093	61	38
817	1998168	1821740	191719	77327	10321	8753	4534	4173	188	110	5550	4433	49	37
818	1997797	1828785	190814	74928	10097	8545	4445	4068	162	105	5437	4335	53	37
819	1978037	1778325	189217	79279	10100	8528	4470	4105	144	93	5428	4287	58	43
820	1994849	1844677	189983	72482	10320	8691	4443	4103	172	94	5650	4454	55	40
821	2009869	1724516	191662	91731	10316	8772	4500	4150	145	83	5621	4501	50	38
822	1942447	1774164	185891	79549	9891	8397	4280	3949	149	91	5407	4320	55	37
823	2008349	1917256	191731	75235	10433	8896	4612	4240	163	98	5605	4521	53	37
824	1983716	1788037	189826	79355	10674	9054	4557	4256	208	117	5845	4640	64	41
825	1994205	1802989	191286	76175	10052	8457	4364	4021	157	87	5470	4305	61	44
826	1991753	1824712	191186	78501	10062	8544	4420	4071	162	100	5425	4338	55	35
827	2002362	1800984	192011	77227	10861	9150	4606	4266	223	131	5978	4715	54	38
828	2001304	1800133	190605	80552	10565	8904	4508	4201	218	137	5792	4535	47	31
829	1983525	1753985	189741	80806	10937	9294	4619	4318	246	144	6013	4789	59	43
830	1990203	1882705	189894	69975	10341	8722	4485	4122	169	107	5642	4462	45	31
831	2004930	1849882	191035	74720	10230	8532	4383	4020	153	90	5632	4378	62	44
832	2001015	1827486	191324	77828	9891	8390	4390	4038	137	82	5314	4234	50	36
833	1988981	1787047	189506	77370	10144	8566	4366	4042	174	106	5548	4382	56	36
834	1989585	1871223	189966	72199	9772	8232	4259	3902	154	86	5315	4213	44	31
835	1991647	1836539	189782	73999	10349	8705	4431	4066	181	112	5673	4490	64	37
836	1982577	1887380	188654	70046	10436	8748	4597	4178	147	101	5631	4426	61	43
837	2008405	1909199	191356	70376	10738	9013	4709	4296	172	103	5792	4567	65	47
838	2004292	1905637	190948	74811	9779	8193	4261	3866	137	82	5332	4212	49	33
839	1993072	1836665	190052	75218	10988	8338	5089	4099	114	75	5724	4124	61	40
840	1997721	1855055	190394	76230	9733	8275	4256	3926	165	110	5257	4203	55	36
841	1997272	1834797	190697	76080	11144	9439	4674	4332	238	150	6187	4927	45	30
842	1993468	1806609	190565	74763	9634	8060	4188	3793	112	66	5282	4170	52	31
843	1977245	1817168	188314	76920	10191	8486	4493	4098	152	89	5495	4268	51	31
844	2000962	1820897	191213	78648	10564	8915	4597	4193	151	108	5757	4573	59	41
845	1994993	1816766	190306	79448	10412	8629	4555	4137	142	85	5652	4364	63	43
846	1987911	1786749	190363	79517	10207	8498	4483	4048	138	83	5535	4335	51	32
847	2000789	1847320	192157	80479	9675	8018	4209	3796	130	85	5280	4102	56	35
848	2006258	1858141	191665	77406	10750	9096	4683	4356	208	124	5790	4575	69	41
849	2010123	1852868	191882	79698	10391	8688	4401	4032	163	95	5775	4523	52	38
850	2005198	1822511	191555	82021	9864	8323	4375	3993	147	96	5293	4203	49	31
851	2009234	1914283	191406	75986	11024	9309	4643	4297	212	129	6111	4844	58	39
852	1970130	1806700	190029	83812	10333	8705	4459	4100	190	121	5633	4450	51	34
853	1994887	1786891	189807	76903	10819	9202	4578	4283	238	138	5950	4742	53	39
854	1995714	1827929	189840	77378	10794	9121	4626	4288	242	140	5859	4645	67	48
855	1984458	1791228	188650	80247	10725	9097	4567	4258	199	120	5907	4689	52	30
856	1996624	1810569	190583	83095	10024	8527	4412	4103	177	109	5385	4278	50	37
857	1972949	1791656	187575	78174	10287	8688	4520	4157	177	101	5530	4398	60	32
858	2009105	1911762	192009	71534	10167	8587	4513	4141	157	89	5449	4328	48	29
859	1982907	1810963	189193	78312	9607	8135	4228	3878	153	85	5177	4139	49	33
860	1994656	1884807	190749	73832	10199	8523	4363	3958	159	94	5620	4437	57	34
861	1996291	1781298	190793	78690	10146	8547	4386	4021	149	98	5546	4390	65	38
862	1981707	1773258	189134	79532	9640	8097	4227	3869	151	95	5200	4095	62	38
863	2002666	1901003	191217	72351	10206	8674	4547	4166	179	109	5426	4364	54	35
864	1982440	1766109	190145	76241	10358	8701	4549	4126	189	115	5560	4413	60	47
865	1990967	1886018	189678	72471	9897	8373	4232	3904	170	105	5442	4328	53	36
866	2002163	1849122	190773	77249	9647	8192	4275	3900	141	81	5181	4176	50	35
867	2000273	1856087	190668	76501	11166	9424	4855	4497	220	131	6035	4755	56	41
868	1978939	1817313	188418	74965	9616	8196	4273	3903	132	80	5145	4165	66	48
869	1979836	1811875	187574	77713	10442	8712	4532	4112	164	90	5690	4469	56	41
870	1995099	1827658	191152	77252	9537	7969	4157	3775	130	84	5190	4072	60	38
871	1995844	1823716	190561	76696	9813	8196	4350	3941	143	84	5258	4128	62	43
872	1976677	1808323	188286	77368	9446	7949	4188	3817	160	97	5052	4006	46	29
873	2008106	1856196	191477	74265	10900	9214	4638	4301	249	145	5949	4732	64	36
874	1986611	1835304	190146	73697	9409	7934	4129	3798	149	91	5073	4011	58	34
875	1990537	1800807	190553	74097	11115	9334	4776	4391	220	124	6070	4787	49	32
876	1979660	1827276	188305	84160	9646	8072	4338	3944	149	85	5109	4011	50	32
877	1988622	1818769	188481	76565	9710	8058	4270	3859	120	77	5277	4094	43	28
878	1985949	1805059	190072	78656	10554	8926	4475	4156	229	130	5803	4610	47	30
879	1975052	1813075	187852	79885	11095	9423	4733	4369	228	138	6077	4877	57	39
880	1990773	1814128	189437	79436	10283	8754	4539	4152	178	112	5508	4447	58	43
881	1982437	1825310	189752	76855	10155	8507	4502	4088	159	100	5444	4286	50	33
882	1986526	1817400	190754	79031	10189	8632	4497	4100	168	99	5466	4402	58	31
883	2003946	1827159	190392	80698	9608	8128	4273	3905	149	106	5119	4080	67	37
884	2003758	1826916	191518	77876	9980	8397	4321	3986	178	108	5416	4259	65	44
885	2011622	1857490	192101	76769	10064	8451	4435	4048	176	114	5408	4258	45	31
886	2006280	1857265	192775	71056	10026	8494	4397	4025	167	105	5415	4331	47	33
887	1978494	1824596	188425	74365	10839	9189	4673	4285	188	104	5913	4757	65	43
888	1979200	1889061	189243	77176	10524	8811	4534	4142	175	100	5754	4523	61	46
889	2000307	1802245	191386	82111	9367	7969	4050	3721	134	89	5119	4122	64	37
890	1981286	1811936	189191	80264	9907	8327	4294	3936	152	88	5409	4277	52	26
891	1995930	1789929	190829	77515	9649	8138	4257	3896	142	91	5192	4110	58	41
892	1977233	1799605	189598	77618	9522	8094	4258	3901	148	88	5075	4078	41	27
893	2021906	1856672	192458	77287	9622	8101	4201	3852	155	104	5211	4112	55	33
894	1985066	1782087	189604	76646	10008	8527	4410	4066	157	100	5378	4319	63	42
895	2009076	1834969	191891	82516	9859	8265	4336	3938	149	104	5316	4186	58	37
896	1985074	1819510	189501	76298	9508	7982	4197	3812	128	75	5125	4056	58	39
897	1994659	1900022	190197	70995	9850	8245	4355	3973	166	108	5273	4130	56	34
898	1986539	1796742	189901	72698	10299	8717	4481	4112	181	101	5579	4460	58	44
899	1994243	1795273	190271	77841	10896	9190	4588	4214	204	137	6057	4809	47	30
900	1986940	1890678	189844	72246	9579	8121	4146	3818	129	77	5251	4185	53	41
901	2006810	1902504	192384	72280	9924	8380	4338	3950	155	95	5373	4301	58	34
902	1994414	1793430	190766	75743	10189	8451	4432	4051	157	91	5542	4268	58	41
903	1988846	1761010	190568	76602	10108	8458	4407	3990	138	86	5508	4349	55	33
904	1982590	1805165	188908	73958	10229	8579	4427	4098	181	94	5566	4349	55	38
905	1997823	1811550	189939	78020	9936	8272	4344	3920	146	92	5398	4227	48	33
906	1981309	1860794	188697	72556	10006	8476	4400	4037	135	88	5423	4325	48	26
907	2010833	1816971	192412	78813	9986	8430	4316	3984	162	99	5449	4301	59	46
908	2003288	1759372	191732	80707	10604	8902	4495	4182	211	120	5842	4560	56	40
909	1979254	1848311	188782	70302	9787	8214	4281	3914	139	86	5305	4180	62	34
910	1977397	1874133	187602	70485	10517	8992	4467	4185	238	127	5760	4643	52	37
911	1997924	1815915	190033	78877	10912	9204	4619	4298	249	150	5975	4705	69	51
912	2005171	1902845	190746	72169	10272	8521	4420	4038	139	81	5661	4367	52	35
913	1977736	1884813	188707	70010	10117	8417	4350	3965	145	80	5582	4352	40	20
914	1916480	1720666	181830	75222	10166	8371	4319	3945	167	95	5621	4288	59	43
915	1999438	1797476	190620	79595	10121	8519	4389	4034	148	91	5543	4367	41	27
916	1994337	1792293	190958	78381	10967	9156	4669	4299	196	121	6055	4703	47	33
917	1996825	1819977	190101	79809	9976	8330	4360	3979	135	82	5422	4233	59	36
918	1981336	1895068	188291	75324	9767	8025	4254	3794	119	62	5353	4143	41	26
919	1988481	1787862	188492	79390	10800	9059	4628	4293	216	129	5907	4607	49	30
920	1974849	1819200	188473	73140	10013	8343	4349	3967	146	80	5475	4274	43	22
921	1960151	1863265	186872	71405	11024	9228	4647	4327	232	130	6086	4731	59	40
922	1970443	1872400	187914	73190	10722	9074	4519	4247	216	115	5930	4678	57	34
923	1984403	1797635	189012	74781	9902	8182	4229	3822	158	99	5455	4224	60	37
924	1986290	1780674	189170	78290	9907	8296	4214	3850	153	99	5480	4304	60	43
925	2001470	1855064	191223	81266	9837	8240	4270	3880	146	96	5373	4234	48	30
926	1993107	1826219	191047	82687	10165	8554	4457	4059	147	92	5510	4371	51	32
927	2005516	1908138	191839	75118	10749	9158	4595	4278	238	153	5867	4700	49	27
928	1980326	1875056	188599	74000	10028	8415	4334	3951	115	76	5534	4359	45	29
929	1988264	1873857	190452	71018	10795	9081	4552	4237	242	144	5950	4667	51	33
930	2025241	1799675	193820	79593	10813	9075	4575	4241	218	131	5966	4667	54	36
931	2001965	1829235	191749	75164	10304	8659	4344	3991	170	103	5725	4525	65	40
932	1997031	1759534	191638	88383	10134	8419	4288	3901	158	91	5629	4385	59	42
933	2004696	1742177	191520	77371	9687	8271	4289	3978	159	104	5174	4143	65	46
934	1984350	1827845	190123	75059	9680	8200	4280	3935	146	88	5203	4144	51	33
935	1973255	1814584	189511	75055	10948	9234	4635	4314	210	123	6047	4759	56	38
936	2009206	1866128	191759	75162	10812	9122	4538	4220	217	128	6001	4734	56	40
937	1931142	1878081	169021	54094	10794	9075	4496	4165	228	138	6014	4735	56	37
938	1880452	1783364	173970	57836	10374	8595	4474	4079	136	89	5710	4389	54	38
939	1988652	1879810	189907	74059	11686	8907	5334	4303	127	80	6163	4484	62	40
940	1999602	1849680	191329	77844	9998	8138	4307	3860	130	69	5509	4179	52	30
941	2006006	1822564	191432	73728	9819	8361	4307	3986	165	111	5294	4234	53	30
942	2007027	1827387	191340	74173	10034	8533	4347	4041	180	115	5445	4339	62	38
943	2008950	1910174	192540	76279	10089	8595	4369	4056	188	107	5470	4392	62	40
944	2013348	1830992	192606	72892	11934	9684	5360	4752	235	84	6302	4826	37	22
945	1984113	1802683	190166	84778	11219	9239	4832	4423	182	94	6151	4692	54	30

## Sheet: Supplementary Data 3
Table S3. Imputation quality on SNP array data from 9,909 individuals from three Han Chinese cohorts.
Imputation panel used	Variant type	Allele frequency1	Three Han Chinese cohorts from Li et al. 2022
			TZL (n = 2,961)		NSPT (n = 2,679)		JD (n = 4,269)
			High imputation quality2	Low imputation quality2	High imputation quality	Low imputation quality	High imputation quality	Low imputation quality
Han-SV panel	SNP	Common	4647610	261385	4677136	467676	4686342	431098
		Low-frequency	1254913	605606	1218951	713897	1203665	602518
		Rare	2429826	23292936	3074069	22405261	3080149	22553218
	indel	Common	487798	31777	466481	52291	467114	49032
		Low-frequency	130074	66479	126642	78994	124922	67585
		Rare	218036	2291683	290247	2211192	291334	2225860
	SV	Common	24202	16860	22954	19551	22942	16910
		Low-frequency	4039	21322	3870	24946	3890	21133
		Rare	2304	106864	2972	101298	2964	107752
Expanded-1KGP panel	SNP	Common	4852428	224696	4878467	405141	4890029	424900
		Low-frequency	1407689	446551	1330834	489893	1318555	515127
		Rare	2772346	51336146	2980834	48015620	2981551	50987662
	indel	Common	1252596	122183	1178033	181099	1180281	189854
		Low-frequency	332600	274058	302180	292922	299359	305393
		Rare	381283	6632283	388708	6228441	389281	6630835
	SV	Common	6940	797	6554	1109	6580	1181
		Low-frequency	2292	1111	2161	1138	2132	1188
		Rare	4031	82691	4317	77197	4320	82461
1Common: Minor Allele Frequency (MAF) ≥ 5%; Low-frequency: 1% ≤ MAF< 5%; Rare: MAF < 1%
2High imputation quality: Dosage r2 ≥ 0.7; Low imputation quality: dosage r2 < 0.7

## Sheet: Supplementary Data 4
Table S4. GWAS signals for ﬁngerprint pattern type in Han Chinese from this study and Li et al. 2022.
Locus	Top SNPs in this study	Alt/Ref Allele in this study	Top SNPs in Li et al. 2022	Alt/Ref Allele in Li et al. 2022	Nearest Genes	Associated Digits in this study	Associated Digits in Li et al. 2022	In this study		In Li et al. 2022
								β (Top digit)	p (Top digit)	β (Top digit)	p (Top digit)
2p24.3	rs16862838	T/C	rs16862838	T/C	DDX1; LINC01804	D3L	D3L	-0.085	1.32e-08(D3L)	-0.106	2.92E-09 (D3L)
2q13	/	/	rs371242548	C/A	RANBP2	/	D3R	/	/	-0.184	6.11E-09(D3R)
2q31.1	rs11460049	AT/A	rs11460049	AT/A	OLA1	D2R, D1L	D1L, D2L/R	0.112	6.38E-12(D2R)	0.127	1.32E-12(D2R)
2q33.1	rs4673509	C/A	rs4673509	C/A	FTCDNL1	D2L/R, D3R	D2L/R, D3R	0.101	2.43E-10(D2L)	0.118	1.74E-10 (D2L)
3p14.3	/	/	rs358075	T/C	CACNA2D3	/	D3L/R	/	/	-0.222	2.99E-11 (D3L)
3p14.1	rs72626908	T/A	rs17072351	G/A	ADAMTS9-AS2; MAGI1	D4L, D5R	D4L, D5R	-0.098	9.96E-15(D4L)	-0.133	7.42E-15 (D4L)
3q26.2	rs9860401	C/T	rs6444832	A/G	LINC02082; MECOM	D2L/R, D3L/R, D4L/R	D2L/R, D3L/R, D4L/R	-0.109	4.28E-20(D3L)	-0.133	1.31E-20 (D3L)
3q29	rs80252354	T/C	rs80252354	T/C	LINC02028	D4L	D4L	-0.178	7.95E-09(D4L)	-0.238	7.36E-09 (D4L)
6q21	rs9320124	G/C	rs28700026	C/T	PREP; PRDM1	D2L/R, D3L/R, D4R, D5R	D2L/R, D3L/R, D4R, D5R	-0.102	8.40E-13(D2R)	-0.12	2.57E-13 (D2R)
7p14.3	rs2075127	C/T	rs2075127	C/T	CPVL	D2L, D3L/R, D4L/R, D5R	D2L/R, D3L/R, D4L/R, D5R	0.065	1.655e-13(D3R)	0.118	9.18e-14(D3R)
8q23.1	rs1494910	C/T	rs1494910	C/T	ANGPT1; RSPO2	D1R	D1R	0.156	1.26E-16(D1R)	0.215	1.30E-16 (D1R)
12q12	rs2731044	G/T	rs2731043	C/T	DBX2	D3R	D3R	0.082	1.38E-08(D3R)	0.107	8.06E-09(D3R)
2q24. 21	/	/	rs7957733	G/C	TBX3	/	D2L/R, D4L/R, D5L/R	/	/	0.111	3.78E-12(D5L)
3q21. 33	rs11618603	G/C	rs11618603	G/C	ATXN8OS; LINC00348	D3L/R	D2L/R, D3L/R	0.111	7.95E-11(D3L)	0.14	1.24E-11 (D3L)
6q12. 2	rs5005161	C/T	rs5005161	C/T	RPGRIP1L	D3L	D3L	0.076	2.34E-10(D3L)	0.092	1.93E-10(D3L)
17p12	rs7208722	G/A	rs7208722	G/A	HS3ST3B1; LOC101928475	D3R	D3R	0.08	4.81E-11(D3R)	0.108	4.63E-12(D3R)
18q21.2	rs17089876	C/T	rs17089876	C/T	TCF4	D5L/R	D5L/R	0.066	1.53E-09(D5L)	0.087	1.46E-09(D5L)
18q23	rs2004773	A/G	rs2004773	A/G	LINC01029; SALL3	D5L	D2L/R, D5L/R	0.0716	1.84E-11(D5L)	0.164	6.14E-29(D5R)
4q32.3	rs72982293	C/T	/	/	LINC01179; TLL1	D2L	/	0.368	6.466e-09(D2L)	/	/
7p12.3	rs2195883	G/A	/	/	IGFBP3; LOC730338	D5L	/	0.0849	4.01E-09(D5L)	/	/
Nearest Genes: The nearest genes annotate by SnpEff or AnnotSV, which uses the database of the GRCh38.105 and GRCh38.p14, respectively.
/: Information for these Loci which are not significant associated or are exclued based on quantility score in corresponding studies is not shown.

## Sheet: Supplementary Data 5
Table S5. Imputation quality on a small variant set derived from SRS data of a cohort with 1,016 Chinese individuals.
Variant type	Allele frequency*	High quality (dosage r2 ≥ 0.7)	Low quality (dosage r2 < 0.7)
SNP	Common	5408626	52085
	Low-frequency	2021921	172627
	Rare	11793242	13589815
indel	Common	523072	4838
	Low-frequency	204633	20595
	Rare	816965	1656709
SV	Common	35624	10746
	Low-frequency	12879	17618
	Rare	22446	76278
*Common: MAF ≥ 5%; Low-frequency 1% ≤ MAF< 5%; Rare: MAF < 1%

## Sheet: Supplementary Data 6
Table S6. Significant independent GWAS signals for skin trait in 1,016 Chinese individuals.
Locus	Top.variant	EAF	Traits	Genomic location	Notable genes	β(Top trait)	p(Top trait)	Reported in the NHGRI-EBI GWAS catalogue
1p36.21	rs1339030683	0.98967	SELS-Roughness(flexor side of the left arm)	intronic	PRAMEF17(G)	-0.726223	1.99e-08	No
1q32.1	rs145596827	0.9877	SP_X(flexor side of the left arm)	intergenic	NAV1(G/E),LOC107985246(G),ENSG00000236390(E),IPO9(E)	3.59129	1.52e-08	No
1q32.2	rs77059105	0.98819	sebum-skin oil(forehead)	intergenic	LINC01774(G),LINC01696(G)	-53.2328	1.75e-08	No
1q32.3	rs2095266828	0.7992	pH(flexor side of the left arm)	intergenic	RPS6KC1(G),PROX1-AS1(G)	0.149499	1.68e-08	No
1q34.3	rs12078956	0.98868	SELS-Roughness(flexor side of the left arm)	intergenic	SMIM12(G),DLGAP3(G)	-0.730317	3.43e-09	No
1p32.2	rs144378135	0.98917	SELS-Roughness(flexor side of the left arm)	intronic	DAB1(G)	-0.721603	4.13e-08	No
1p32.1	rs200295186	0.98967	SP_X(flexor side of the left arm);SP_Y(flexor side of the left arm)	intronic	FGGY(G)	4.62647	1.31e-10	No
1p22.3	chr1_87581439_SV_DEL	0.97441	SELS-Roughness(flexor side of the left arm)	intergenic	LMO4(G)	-0.53832	3.15e-10	No
1p22.2	rs144361011	0.9813	SELS-Roughness(flexor side of the left arm)	intergenic	CDC7(G/E),TGFBR3(G/E),WDR82P2(E),LOC102723436(E)	-0.541384	1.64e-08	No
10q26.13	rs77196705	0.97293	sebum-skin oil(left cheek)	intronic	ATE1(G)	-31.3744	3.89e-10	No
10q26.13	rs7070310	0.98278	sebum-skin oil(left cheek)	intronic	CHST15(G)	-39.846	1.2e-10	No
10p11.21	rs202173170	0.98228	dermis density%(left cheek)	intergenic	PARD3-AS1(G),CUL2(G),LINC02635(E),PARD3(E),CREM(E)	-3.87596	1.47e-08	No
10p11.21	rs2135483866	0.93159	TH(left cheek)	intergenic	CCNY(G/E),GJD4(G/E),LOC107984221(E),FZD8(E)	-0.645319	2.53e-08	No
10q11.21	rs2133225609	0.7308	pH(flexor side of the left arm)	intronic	RASGEF1A(G)	0.16417	2.88e-10	No
10q21.1	rs555715926	0.98671	SELS-Roughness(flexor side of the left arm)	intronic	IPMK(G)	-0.651669	1.39e-08	No
10q22.3	rs188986363	0.98868	sebum-skin oil(left cheek)	intergenic	LRMDA(G),KCNMA1(G)	-42.9076	1.51e-08	No
11p11.2	chr11_44791613_TCTC_T	0.97638	SP_L*a*b*3(left cheek)	intronic	TSPAN18(G)	-1.64125	1.64e-08	No
11q14.1	rs78075570	0.98524	sebum-skin oil(forehead)	intronic	DLG2(G)	-46.2294	1.62e-08	No
11q22.1	rs117110384	0.9872	SELS-Roughness(flexor side of the left arm)	intergenic	LINC02737(G),CNTN5(G)	-0.671505	3.35e-08	No
12p11.23	rs7957317	0.9188	brightness(flexor side of the left arm)	intergenic	C12orf71(G),STK38L(G)	-0.39463	1.36e-09	No
12p13.31	rs144884748	0.9872	SP_X(flexor side of the left arm);SP_Y(flexor side of the left arm)	downstream	SLC2A14(G/E),ENSG00000199912(E),NANOG(E),DPPA3(E),SLC2A3(E)	3.38743	2.21e-09	No
12q23.1	rs12370582	0.842	sebum-skin oil(left cheek)	intergenic	MIR4303(G),SLC9A7P1(G)	-12.9956	2.18e-09	No
13q34	rs188201967	0.98967	SELS-Roughness(flexor side of the left arm)	intergenic	ANKRD10(G/E),LINC00431(G),ENSG00000275989(E),SPACA7BP(E),PRECSIT(E),ARHGEF7(E),TEX29(E)	-0.806141	4.7e-09	No
13q13.2	rs2139364656	0.94882	pH(flexor side of the left arm)	exonic	RFC3(G/E),STARD13(E)	0.24405	1.1e-08	No
13q13.3	rs150115396	0.9877	SELS-Roughness(flexor side of the left arm)	intergenic	LINC00445(G),DCLK1(G)	-0.67526	2.54e-08	No
13q21.32	rs117207717	0.98917	SELS-Roughness(flexor side of the left arm)	intergenic	LINC00355(G),LINC01052(G)	-0.747133	2.92e-08	No
14q21.2	rs141621117	0.98228	sebum-skin oil(left cheek)	ncRNA_intronic	LINC00871(G)	-35.5938	1.23e-08	No
14q23.2	rs371021277	0.98474	sebum-skin oil(forehead)	intronic	SYT16(G)	-60.9943	2.68e-11	No
14q31.3	rs150773126	0.9877	sebum-skin oil(forehead)	intergenic	LINC02328(G),LINC01148(G)	-53.7164	6.43e-09	No
14q32.12	rs76572780	0.97638	sebum-skin oil(left cheek)	intronic	ITPK1(G)	-29.5806	3.17e-08	No
15q21.1	rs148938825	0.9872	dermis density%(left cheek);skin density%(left cheek);skin density(left cheek)	intergenic	LOC105370802(G),SEMA6D(G)	-4.91858	1.24e-10	No
15q22.2	rs140733336	0.98967	pH(left cheek)	intronic	TLN2(G)	0.368923	1.48e-08	No
16p13.12	rs546699915	0.98967	sebum-skin oil(left cheek)	intronic	SHISA9(G)	-46.6925	4.85e-09	No
16p12.1	rs146888238	0.98622	L*(left cheek) by front Cross-Polarized	intergenic	CACNG3(G),RBBP6(G)	3.70547	5.64e-09	No
16q21	rs147618841	0.98967	a* by left Standard2	intergenic	LINC02141(G),MIR4426(G)	-2.72482	2.49e-08	No
17q24.3	rs1911381498	0.98868	a* by right UV-NF	intergenic	KCNJ2(G),CASC17(G)	-3.61243	1.5e-08	No
17q25.3	rs1598328870	0.8967	pH(flexor side of the left arm)	intronic	SEPTIN9(G/E),ENSG00000266998(E),TNRC6C(E)	0.183611	9.48e-09	No
18p11.32	rs139753931	0.98425	SP_X(flexor side of the left arm)	intronic	USP14(G)	2.8786	2.86e-08	No
18q11.2	rs535502944	0.98671	sebum-skin oil(forehead)	intergenic	ZNF521(G),SS18(G)	-52.4348	9.49e-10	No
18p11.23	rs147476791	0.98474	sebum-skin oil(left cheek)	intronic	PTPRM(G)	-41.0791	3.16e-10	No
19q12	rs2146138087	0.8927	pH(flexor side of the left arm)	intronic	ZNF536(G)	0.182115	9.74e-09	No
2q12.2	rs866408068	0.98327	sebum-skin oil(left cheek)	intergenic	CD8B2(G/E),ST6GAL2(G/E)	-40.3061	3.85e-11	No
2q14.1	rs183326147	0.98524	SELS-Roughness(flexor side of the left arm)	intergenic	DPP10(G),DDX18(G)	-0.682754	1.09e-08	No
2q22.1	rs74433695	0.98327	transparency_area(left cheek)	intergenic	YY1P2(G),LRP1B(G)	-7744.32	3.32e-08	No
2q22.2	rs1709045303	0.8991	pH(flexor side of the left arm)	intergenic	LRP1B(G),KYNU(G)	0.218541	1.02e-11	No
2q24.1	rs10439365	0.8937	a*(right cheek) by front UV-NF	intergenic	GPD2(G),GALNT5(G)	-1.15874	4.39e-08	No
2q34	rs62193370	0.92175	protoheme by DSM-III;G	ncRNA_intronic	LOC101927960(G)	-1.1205	1.79e-09	No
2q34	rs7608552	0.92175	brightness by DSM-III;melanin by DSM-III;B	downstream	LOC101927960(G)	2.14014	1.16e-08	No
2p23.1	rs6548031	0.96506	sebum-skin oil(forehead)	intronic	CAPN13(G)	-30.4162	2.58e-08	No
2p14	rs1443735372	0.98917	sebum-skin oil(forehead)	intergenic	LINC01799(G/E),LINC01797(G),LINC01628(E),MEIS1(E),ETAA1(E)	-64.6295	4.4e-11	No
2p14	rs10198347	0.9685	firmness(flexor side of the left arm F4)	ncRNA_intronic	LINC01828(G/E),LOC101927661(E),ETAA1(E),LINC01829(E),MEIS1(E)	-1.9442	3.75e-11	No
20p12.2	rs142654747	0.98967	SP_L*a*b*2(flexor side of the left arm)	intergenic	LOC339593(G),LINC00687(G)	-1.55576	5.98e-09	No
21q21.1	rs181505796	0.96752	transepidermal water loss(left cheek)	intergenic	LINC01683(G),LINC02573(G)	-3.75123	4.49e-08	No
21q22.11	rs1049154971	0.94045	pH(flexor side of the left arm)	upstream	SCAF4(G/E),ENSG00000273091(E),SCAF4(E),SOD1(E),MIS18A(E),CFAP298(E)	-0.227418	1.32e-08	No
22q13.32	rs2318401	0.98622	sebum-skin oil(left cheek)	intergenic	LINC01310(G),TAFA5(E),BRD1(E)	-39.5202	3.62e-08	No
3q13.13	rs73851446	0.98917	sebum-skin oil(left cheek)	intergenic	MIR4445(G),NECTIN3-AS1(G)	-43.8111	3.04e-08	No
3q22.1	rs569513073	0.98573	wrinkles(left cheek)	intergenic	LINC02021(G),COL6A4P2(G)	-32.9517	8.46e-10	No
3q22.2	rs139453854	0.97785	sebum-skin oil(forehead)	intergenic	EPHB1(G),PPP2R3A(G)	-38.6504	1.4e-08	No
3q22.3	rs10935255	0.98917	L* by left Cross-Polarized	intergenic	IL20RB(G),SOX14(G)	4.05819	6.13e-09	No
3q25.2	rs202242138	0.98917	transparency_a(left cheek)	ncRNA_intronic	LINC02006(G)	0.00319426	3.29e-09	No
3q26.31	rs1033466359	0.98868	transepidermal water loss(flexor side of the left arm)	intergenic	NAALADL2(G/E),NLGN1(G)	-1.93559	3.22e-08	No
3p24.3	rs188773394	0.98967	SP_X(flexor side of the left arm)	intergenic	LOC101927829(G),VENTXP7(G)	3.63144	6.9e-09	No
3p24.3	rs1497507	0.5527	skin density(flexor side of the left arm)	intergenic	LOC101927829(G),VENTXP7(G),SGO1(E)	-3.75013	2.89e-08	No
3p22.3	rs199740332	0.98474	SELS-Roughness(flexor side of the left arm)	ncRNA_intronic	LOC101928135(G)	-0.619837	8.29e-09	No
3p12.3	rs11917794	0.98524	a*(right cheek) by front UV-NF	intronic	CNTN3(G)	-3.29959	2.09e-09	No
4q28.3	rs117860775	0.98524	sebum-skin oil(forehead)	intergenic	LINC02511(G),PCDH18(G)	-53.4158	4.7e-10	No
4q32.3	rs80162682	0.98425	sebum-skin oil(left cheek)	intronic	MARCHF1(G/E),TMA16(E)	-34.4717	4.34e-08	No
4q32.3	rs1208355909	0.98671	sebum-skin oil(left cheek)	intergenic	APELA(G),TRIM61(G)	-38.8484	3.15e-08	No
4q32.3	rs4692657	0.8706	wrinkles(flexor side of the left arm)	intronic	DDX60L(G)	-3.58926	1.44e-08	No
4q34.2	rs76809886	0.97982	dermis density%(left cheek)	intronic	GPM6A(G)	-3.55717	5.27e-09	No
4q34.3	rs117430898	0.96014	SP_X(flexor side of the left arm)	intergenic	LINC02509(G),NEIL3(G)	1.9084	7.91e-09	No
4p15.2	rs1730982401	0.92077	pH(left cheek)	intergenic	STIM2(G),LINC02261(G)	0.140601	3.58e-08	No
4p16.2	rs11722255	0.96998	sebum-skin oil(forehead)	ncRNA_intronic	STX18-AS1(G)	-33.036	3.58e-08	No
5q23.2	rs190088744	0.98917	SELS-Roughness(flexor side of the left arm)	ncRNA_intronic	LINC01170(G)	-0.717343	4.87e-08	No
5p15.2	rs59963672	0.97589	skin density%(flexor side of the left arm)	intronic	TRIO(G/E),OTULINL(E)	4.76343	3.97e-08	No
5q35.3	rs558952234	0.98228	SP_X(flexor side of the left arm)	intronic	FLT4(G)	2.84771	1.53e-08	No
5p13.3	rs148863967	0.93553	wrinkles(flexor side of the left arm)	intergenic	LINC02064(G),LOC105374704(G)	-5.00929	2.14e-09	No
5p13.3	rs145267702	0.97736	SP_X(flexor side of the left arm);SP_Y(flexor side of the left arm)	intergenic	LINC02064(G),LOC105374704(G)	2.68815	1.66e-09	No
5q13.3	rs17565295	0.98917	sebum-skin oil(forehead)	intergenic	SV2C(G/E),LOC441087(G),LOC100996384(E),ENSG00000251342(E),SAP18P1(E),ENSG00000248127(E),IQGAP2(E)	-62.0444	2.59e-10	No
5q14.1	rs140264122	0.98868	firmness(flexor side of the left arm F4)	intronic	HOMER1(G)	-2.92125	2.63e-09	No
6q22.31	rs9372756	0.7923	dermis density%(flexor side of the left arm)	intergenic	TRDN(G),NKAIN2(G)	1.89993	3.88e-08	No
6q23.2	rs146414977	0.98917	SELS-Roughness(flexor side of the left arm)	intergenic	RPS12(G),LINC00326(G)	-0.879295	5.42e-12	No
6q25.2	rs182486265	0.98967	skin density(left cheek)	intronic	SYNE1(G)	-13.6035	4.44e-08	No
6q25.3	rs117567592	0.98622	SELS-Roughness(flexor side of the left arm)	intergenic	MIR1202(G),SNORD28B(G)	-0.642339	4.36e-09	No
6q13	rs74440992	0.98573	sebum-skin oil(left cheek)	intergenic	LINC01626(G),RIMS1(G)	-39.5893	7.18e-09	No
6q14.1	rs78512075	0.9813	sebum-skin oil(left cheek)	intergenic	BCKDHB(G/E),TENT5A(G/E)	-37.1864	1.63e-10	No
7p21.3	rs1302082209	0.98868	transparency_a(left cheek)	intergenic	THSD7A(G),TMEM106B(G)	0.00300676	1.63e-08	No
7q34	rs1814145352	0.8287	TH(left cheek)	intronic	KIAA1549(G)	-0.474612	1.97e-08	No
7q36.1	rs144949383	0.98967	sebum-skin oil(left cheek)	intronic	KMT2C(G)	-48.401	2.17e-09	No
7q36.3	rs187115628	0.98917	SP_X(flexor side of the left arm)	ncRNA_intronic	LINC01006(G),RNF32(E),RNF32-DT(E),LMBR1(E),NOM1(E),SHH(E),RBM33(E)	3.49376	4.92e-08	No
7p14.3	rs545737814	0.98917	SELS-Roughness(flexor side of the left arm)	ncRNA_intronic	NPSR1-AS1(G)	-0.903401	5.15e-12	No
7q21.11	rs11764019	0.8529	dermis density(left cheek)	intergenic	PHTF2(G),MAGI2(G)	-2.62178	2.76e-08	No
8q23.3	rs147588978	0.98228	pH(left cheek)	intergenic	LINC00536(G),EIF3H(G)	0.279692	1.71e-08	No
8p21.1	rs145186061	0.9872	dermis density%(left cheek);skin density%(left cheek);skin density(left cheek)	intronic	INTS9(G)	-5.22906	3.97e-11	No
8q12.1	rs117277453	0.98474	sebum-skin oil(forehead)	intergenic	XKR4(G),TMEM68(G)	-51.3017	6.48e-10	No
8q21.11	rs58156336	0.98967	SP_X(flexor side of the left arm);SP_Y(flexor side of the left arm)	intergenic	SBSPON(G),C8orf89(G)	4.16237	6.17e-11	No
8q21.13	rs138781621	0.98967	sebum-skin oil(forehead)	intronic	MRPS28(G)	-53.9477	2.11e-08	No
8q21.3	rs16906589	0.97638	sebum-skin oil(left cheek)	intronic	NECAB1(G)	-30.5893	1.01e-08	No
8q21.3	rs3885969	0.5015	b*(left cheek) by front Standard1;b*(left cheek) by front Cross-Polarized	intronic	LRRC69(G)	-0.758131	1.52e-08	No
8q22.1	rs142820055	0.97244	SELS-Roughness(flexor side of the left arm)	intergenic	C8orf87(G),LINC00535(G)	-0.508965	1.66e-09	No
9q33.2	rs151273536	0.98376	SELS-Roughness(flexor side of the left arm)	intronic	MRRF(G/E),RBM18(E),LHX6(E),PTGS1(E),TTLL11(E)	-0.613601	2.17e-08	No
9q21.11	rs7862888	0.98917	sebum-skin oil(left cheek)	intronic	PGM5(G/E),TMEM252(E)	-46.5873	3.94e-10	No
9q21.13	rs75297569	0.98819	dermis density%(left cheek)	intergenic	ANXA1(G),LOC101927358(G)	-4.88426	1.05e-09	No
1p36.33	rs1644861367	0.8406	TH(left cheek)	intronic	AGRN(G/E),RNF223(E)	-0.479082	2.63e-08	Yes
1q21.3	rs140774975	0.8868	moisture(left cheek)	intergenic	LCE2B(G),LCE2A(G)	5.29698	1.53e-08	Yes
1q32.1	rs142511692	0.9872	elasticity(flexor side of the left arm R2)	intronic	LGR6(G)	0.0784501	1.22e-08	Yes
1q42.12	rs150923828	0.98278	SP_X(flexor side of the left arm);SP_Y(flexor side of the left arm)	intergenic	PARP1(G),STUM(G)	3.0736	1.69e-09	Yes
1p36.31	rs1194671941	0.877	pH(flexor side of the left arm)	intronic	PLEKHG5(G)	0.192705	1.41e-10	Yes
1p31.1	rs186231742	0.98278	dermis density%(left cheek)	intronic	MIGA1(G/E),NSRP1P1(E),RNA5SP21(E),ACTG1P21(E),NEXN(E)	-3.99909	2.4e-08	Yes
10p15.2	rs2131640841	0.92766	pH(flexor side of the left arm)	intronic	PFKP(G)	0.202911	3.9e-08	Yes
10q22.3	rs1840582295	0.95669	a*(left cheek) by front UV-NF	intergenic	LINC00595(G),ZMIZ1-AS1(G)	-1.74118	1.08e-08	Yes
10q22.3	rs76532505	0.98228	sebum-skin oil(left cheek)	intergenic	LINC00595(G),ZMIZ1-AS1(G)	-33.7199	3.54e-08	Yes
11q23.3	rs78730658	0.96752	protoheme(flexor side of the left arm)	intronic	ARCN1(G)	-31.6797	4.78e-09	Yes
11p15.3	rs7111481	0.6501	transparency_a(left cheek)	intergenic	MICAL2(G/E),LINC02547(G),PARVA(E)	-0.000676393	1.01e-08	Yes
11q24.2	rs1950959825	0.95571	pH(flexor side of the left arm)	intronic	FOXRED1(G/E),SRPRA(E),FAM118B(E),RPUSD4(E)	0.251661	4.22e-08	Yes
11q25	rs144652628	0.9872	SP_X(flexor side of the left arm);SP_Y(flexor side of the left arm)	intronic	NTM(G)	3.22654	4.18e-09	Yes
11p13	rs139648119	0.98967	sebum-skin oil(left cheek)	intergenic	PAMR1(G),FJX1(G)	-46.0408	6.9e-09	Yes
11p13	rs117095234	0.98671	dermis density%(left cheek)	intergenic	FJX1(G),TRIM44(G)	-4.2956	3.71e-08	Yes
11p13	rs181215022	0.98671	SELS-Roughness(flexor side of the left arm)	intergenic	TRIM44(G/E),LDLRAD3(G/E)	-0.707596	2.8e-09	Yes
11q12.2	rs370792128	0.98671	sebum-skin oil(forehead)	intergenic	SDHAF2(G),PPP1R32(G)	-50.0573	5.91e-09	Yes
11q13.1	rs1592569978	0.7943	pH(flexor side of the left arm)	UTR3	MAP4K2(G)	0.157212	2.54e-09	Yes
11q13.2	rs369783437	0.98868	SP_X(flexor side of the left arm);SP_Y(flexor side of the left arm)	intergenic	ALDH3B2(G/E),FAM86C2P(G),OR7E11P(E),LOC112268076(E)	3.42007	3.09e-09	Yes
12q24.11	rs149004724	0.98425	SP_X(flexor side of the left arm);SP_Y(flexor side of the left arm)	intergenic	LOC105369980(G),CUX2(G)	2.98404	7.85e-09	Yes
12q24.21	rs117843073	0.98819	sebum-skin oil(forehead)	intergenic	MED13L(G/E),MIR4472-2(G),ENSG00000258346(E),MAP1LC3B2(E),FBXW8(E)	-54.6247	7.07e-09	Yes
12p13.2	rs2136231269	0.98917	SELS-Roughness(flexor side of the left arm)	intronic	DUSP16(G/E),RPL19P17(E),BORCS5(E)	-0.75222	1.08e-08	Yes
12q24.33	rs61942925	0.98327	dermis density(left cheek)	intronic	NOC4L(G)	-6.63993	1.55e-08	Yes
12p12.1	rs147054737	0.9877	sebum-skin oil(forehead)	intergenic	LINC00477(G/E),BCAT1(G/E),SOX5(E)	-51.1289	4.71e-09	Yes
12q13.13	rs79670595	0.97884	SELE-Roughness(flexor side of the left arm)	intronic	COPZ1(G)	-0.521128	4.37e-08	Yes
12p13.31	rs150968119	0.97096	skin density%(flexor side of the left arm)	intronic	ANO2(G)	4.73196	2.72e-08	Yes
12q21.33	rs72620727	0.6954	B	intergenic	KITLG(G),LINC02458(G)	-3.62141	8.38e-09	Yes
13q34	rs184944976	0.9877	transepidermal water loss(left cheek)	ncRNA_intronic	GAS6-AS1(G)	-8.06011	2.32e-13	Yes
13q14.11	rs1219925940	0.98573	sebum-skin oil(forehead)	ncRNA_intronic	TPTE2P5(G)	-47.8275	3.39e-08	Yes
13q14.11	rs543460130	0.95276	pH(flexor side of the left arm)	ncRNA_intronic	TSC22D1-AS1(G),TSC22D1(E),GPALPP1(E),COG3(E)	0.293779	2.45e-11	Yes
15q13.1	rs76930569	0.5659	protoheme by DSM-III;ITA°(backpack);brightness(left cheek);brightness(flexor side of the left arm);ITA°(left cheek);ITA°(flexor side of the left arm);sanguineness by DSM-III	intronic	OCA2(G)	-0.832733	4.19e-16	Yes
15q13.1	rs1800414	0.5719	brightness by DSM-III;melanin by DSM-III;R;G;B;L* by right UV-NF;L*(left cheek) by front UV-NF;L*(right cheek) by front UV-NF;b*(left cheek) by front UV-NF;b*(right cheek) by front Cross-Polarized;L* by left UV-NF;SP_B(left cheek);SP_Z(left cheek);SP_ITA°(left cheek);melanin(flexor side of the left arm)	exonic	OCA2(G)	1.69242	2.26e-16	Yes
15q13.1	rs9920172	0.8784	L*(right cheek) by front Standard1	intronic	OCA2(G/E),GABRG3(E)	0.891181	1.11e-08	Yes
15q13.1	rs993727360	0.5625	b* by left Cross-Polarized;b* by left Parallel-Polarized;b* by left Standard1;b*(left cheek) by front Standard2;b* by right Standard2;b*(left cheek) by front Standard1;b*(right cheek) by front Standard2	intronic	OCA2(G)	-1.05487	9.44e-09	Yes
15q13.1	rs75295597	0.5758	b*(right cheek) by front UV-NF;b* by left UV-NF;b* by right UV-NF	intronic	OCA2(G)	-2.11085	4.04e-11	Yes
15q23	rs2140566772	0.877	pH(flexor side of the left arm);pH(left cheek)	upstream;downstream	GRAMD2A(G/E),PKM(G/E),ENSG00000261460(E),MYO9A(E),CELF6(E),HEXA(E),ENSG00000261187(E),ARIH1(E),ENSG00000260534(E),ENSG00000260672(E),ADPGK(E),RPL17P39(E)	0.221503	1.2e-13	Yes
16q12.2	rs141227916	0.98671	SP_X(flexor side of the left arm);SP_Y(flexor side of the left arm)	intronic	FTO(G)	3.67413	4.65e-11	Yes
16q22.1	rs2151674711	0.93356	pH(flexor side of the left arm);pH(left cheek)	intronic	ST3GAL2(G/E),RNU6-23P(E),RPS27P26(E),FCSK(E),DDX19A(E),DDX19A-DT(E),COG4(E),AARS1(E),DDX19B(E),SMG1P7(E),PDXDC2P-NPIPB14P(E),WWP2(E),NQO1(E)	0.274201	4.79e-13	Yes
16q23.3	rs140310534	0.96752	dermis density%(left cheek)	intergenic	HSBP1(G),MLYCD(G)	-2.79588	2.74e-08	Yes
16q24.3	rs5015107	0.843	pH(left cheek)	intronic	SPIRE2(G/E),LOC105371419(E),LOC107984817(E),FANCA(E),VPS9D1(E),ZNF276(E),SPATA2L(E),CDK10(E)	0.141299	1.82e-13	Yes
17p11.2	rs546241292	0.9813	dermis density%(left cheek)	intronic	RAI1(G/E),SMCR5(E),SREBF1(E),TOM1L2(E),MYO15A(E)	-3.48064	1.74e-08	Yes
18q21.1	rs2144579912	0.8543	pH(flexor side of the left arm);pH(left cheek)	intronic	RNF165(G/E),ENSG00000279829(E),LOXHD1(E)	0.195934	5.6e-12	Yes
18q21.1	rs142405411	0.98819	sebum-skin oil(forehead)	intronic	SKOR2(G)	-57.1703	1.24e-09	Yes
18q23	rs77706624	0.9685	dermis density%(left cheek)	intronic	NFATC1(G)	-2.70528	4.68e-08	Yes
19p13.2	rs1196888820	0.98425	sebum-skin oil(forehead)	intergenic	ZNF440(G),ZNF439(G)	-45.6149	2.7e-08	Yes
19p13.3	rs2144769219	0.9503	pH(flexor side of the left arm)	intronic	PWWP3A(G/E),ENSG00000279488(E),RPS15P9(E),EFNA2(E)	0.244339	1.69e-08	Yes
19q13.33	rs533357170	0.97096	SP_X(flexor side of the left arm);SP_Y(flexor side of the left arm)	intergenic	TRPM4(G),SLC6A16(G)	2.2804	5.52e-09	Yes
19p13.3	rs10424683	0.98967	transepidermal water loss(flexor side of the left arm)	intergenic	FUT5(G/E),NDUFA11(G),ENSG00000267740(E),CAPS(E)	-2.00519	4.76e-08	Yes
19p13.3	rs116902013	0.98868	sebum-skin oil(left cheek)	intronic	MLLT1(G/E),ENSG00000280394(E),RFX2(E),PSPN(E),GTF2F1(E),ACSBG2(E),KHSRP(E),SLC25A23(E),DENND1C(E),RANBP3(E),ENSG00000267571(E),NDUFA11(E),VMAC(E),GPR108(E),DUS3L(E),VAV1(E),SAFB;(E),NRPEP4(E),ZNF557(E)	-49.3117	9.95e-12	Yes
2p25.1	rs1672541926	0.94783	pH(left cheek)	intergenic	GREB1(G/E),E2F6(G),ROCK2(E),NTSR2(E),LPIN1(E),LOC100506405(E)	0.169299	2.85e-08	Yes
2q14.2	rs149518427	0.98081	sebum-skin oil(left cheek)	intergenic	RALB(G/E),INHBB(G/E),LOC105373584(E),ENSG00000235840(E),LOC105373989(E),ENSG00000224789(E)	-41.6658	3.64e-14	Yes
2q24.2	rs139128705	0.98868	SP_X(flexor side of the left arm);SP_Y(flexor side of the left arm)	intronic	LY75(G),LY75-CD302(G)	3.6704	4.4e-09	Yes
2q32.2	rs189925117	0.98524	dermis density%(left cheek)	intergenic	INPP1(G),MFSD6(G)	-4.13739	2.73e-08	Yes
2q32.3	rs149192281	0.98967	SELS-Roughness(flexor side of the left arm)	intronic	HECW2(G)	-0.749719	5.44e-09	Yes
2p24.1	rs1662280865	0.8086	pH(flexor side of the left arm)	intergenic	SDC1(G/E),PUM2(G/E),DRG1P1(E),RNU7-113P(E)	0.167082	3.81e-10	Yes
2q36.1	rs140937062	0.9749	epidermis thickness(left cheek)	intergenic	EPHA4(G/E),MIR4268(G)	10.577	2.66e-08	Yes
2q37.1	rs567149627	0.98917	SELS-Roughness(flexor side of the left arm)	intergenic	COPS7B(G),MIR1471(G)	-0.807237	6.42e-11	Yes
2q37.3	rs145105430	0.98868	SP_X(flexor side of the left arm)	intergenic	LINC01940(G),HDAC4(G)	3.49314	7.61e-09	Yes
2p14	rs185552938	0.97589	transepidermal water loss(left cheek)	intergenic	SERTAD2(G),LINC01800(G)	-4.40697	2.27e-08	Yes
2p13.1	rs144065050	0.9877	dermis density%(left cheek)	intronic	DGUOK(G/E),TET3(E)	-4.90567	2.02e-08	Yes
20p13	rs187213107	0.98524	sebum-skin oil(left cheek)	intronic	DDRGK1(G)	-37.9368	1.82e-08	Yes
20q13.31	rs4583526	0.6073	ITA°(flexor side of the left arm);SP_B(flexor side of the left arm);SP_Z(flexor side of the left arm);SP_ITA°(flexor side of the left arm);brightness(flexor side of the left arm)	intergenic	TFAP2C(G),BMP7(G)	1.98774	3.84e-09	Yes
21q11.2	rs117156599	0.96506	sebum-skin oil(left cheek)	intronic	SAMSN1(G)	-24.6255	8.14e-09	Yes
21q21.1	rs4564871	0.98868	a* by right UV-NF	intronic	CHODL(G)	-3.52303	4.06e-08	Yes
21q22.12	rs148111488	0.97982	sebum-skin oil(left cheek)	intergenic	RUNX1(G),LOC100506403(G)	-34.3728	2.55e-09	Yes
21q22.12	rs199822567	0.98474	sebum-skin oil(left cheek)	ncRNA_intronic	LOC100506403(G)	-36.6276	2.95e-08	Yes
22q12.1	rs1933341007	0.90699	pH(flexor side of the left arm);pH(left cheek)	exonic	MN1(G/E)	0.259236	3.26e-15	Yes
3q23	rs1576567337	0.8922	pH(flexor side of the left arm)	upstream	PXYLP1(G),ZBTB38(E),RASA2(E),GRK7(E)	0.182171	8.74e-09	Yes
3p24.3	rs181946147	0.98474	ITA°(flexor side of the left arm)	intronic	PLCL2(G)	-7.13065	1.94e-08	Yes
3p26.3	rs147548702	0.9877	skin density(left cheek);skin density%(left cheek);dermis density%(left cheek)	intergenic	CNTN6(G),CNTN4(G)	-14.1217	1.12e-09	Yes
3p21.2	rs1575992415	0.94341	TH(left cheek)	intronic	MAPKAPK3(G/E),CISH(E),C3orf18(E),DOCK3(E),HEMK1(E),CYB561D2(E),RASSF1(E),HYAL1(E),LSMEM2(E),GNAI2(E),MANF(E)	-0.71012	1.87e-08	Yes
4q25	rs1578443648	0.96309	pH(flexor side of the left arm);pH(left cheek)	upstream	PANCR(G/E),LOC105377363(E),PITX2(E),ENSG00000250511(E),ENPEP(E),GAR1(E)	0.308754	5.47e-10	Yes
4q32.1	rs140695264	0.98967	SP_X(flexor side of the left arm)	intronic	PDGFC(G)	3.61051	3.7e-08	Yes
4q35.1	rs201195833	0.98474	SP_X(flexor side of the left arm);SP_Y(flexor side of the left arm)	intergenic	SORBS2(G),TLR3(G)	2.86886	6.42e-09	Yes
4p15.2	rs149812756	0.98917	skin density(left cheek);skin density%(left cheek);dermis density%(left cheek)	intergenic	PI4K2B(G),ZCCHC4(G)	-13.8328	6.01e-09	Yes
4q22.1	rs1763541938	0.8199	TH(left cheek);pH(flexor side of the left arm)	intronic	FAM13A(G)	-0.506169	8.34e-10	Yes
4q22.2	rs191838972	0.98228	SELS-Roughness(flexor side of the left arm)	intronic	GRID2(G)	-0.651132	2.91e-10	Yes
5p15.33	rs142689516	0.98967	elasticity(flexor side of the left arm R2)	ncRNA_intronic	LINC01511(G)	0.0883103	2.47e-08	Yes
5q31.2	rs144617495	0.98425	sebum-skin oil(left cheek)	intronic	SPOCK1(G/E)	-36.9063	4.14e-09	Yes
5q32	rs149182554	0.98967	sebum-skin oil(left cheek)	intronic	PPP2R2B(G/E),GPR151(E)	-46.7598	9.68e-10	Yes
5q32	rs150359304	0.8356	transparency_a(left cheek)	intergenic	ARHGEF37(G),PPARGC1B(G)	0.000880872	3.07e-09	Yes
5p13.2	rs114563004	0.98819	sebum-skin oil(left cheek)	intronic	SPEF2(G)	-41.1738	4.11e-08	Yes
5q11.2	rs117931655	0.98868	SELS-Roughness(flexor side of the left arm)	intronic	ARL15(G)	-0.750912	5.77e-09	Yes
5p15.31	rs2463504	0.98967	sebum-skin oil(forehead)	intronic	SEMA5A(G)	-61.3282	1.25e-09	Yes
5p15.2	rs186108648	0.98917	SP_X(flexor side of the left arm);SP_Y(flexor side of the left arm)	ncRNA_intronic	LINC02112(G)	4.18177	6.74e-12	Yes
6q21	rs530911636	0.98573	sebum-skin oil(left cheek)	intronic	FYN(G/E),TRAF3IP2(E)	-39.6892	5.45e-09	Yes
6q23.1	rs542333434	0.98967	a*(right cheek) by front UV-NF	intergenic	TMEM200A(G/E),SMLR1(G/E),ENSG00000202438(E)	-3.60727	8.27e-09	Yes
6p22.3	rs993919003	0.7884	pH(flexor side of the left arm);pH(left cheek)	intronic	ATXN1(G)	0.176617	1.57e-11	Yes
6q27	rs77954972	0.98474	sebum-skin oil(left cheek)	intronic	PDE10A(G)	-36.8763	2.52e-08	Yes
6p22.3	rs12199488	0.97835	a*(left cheek) by front UV-NF	ncRNA_intronic	CASC15(G)	-2.49452	9.63e-09	Yes
6p22.3	rs41271765	0.98278	sebum-skin oil(forehead)	UTR3	HDGFL1(G)	-45.2224	3.26e-09	Yes
6p25.2	rs1321674612	0.8681	pH(flexor side of the left arm)	ncRNA_intronic	LINC02525(G/E),PSMG4(E),TUBB2A(E)	-0.182994	4.58e-10	Yes
6p21.1	rs1772275101	0.8602	TH(left cheek)	ncRNA_intronic	LOC101929705(G),SCIRT(E),TMEM63B(E),VEGFA(E),POLR1C(E)	-0.523537	3.5e-09	Yes
6p12.2	rs148635688	0.98573	a*(right cheek) by front UV-NF	intergenic	GSTA5(G),GSTA3(G)	-2.98207	4.6e-08	Yes
7q22.3	rs150890343	0.98327	skin thickness(left cheek)	intergenic	NAMPT(G/E),CCDC71L(G/E),ENSG00000286076(E),ENSG00000243797(E)	-299.849	2.85e-08	Yes
7q31.33	rs140409547	0.98524	SELS-Roughness(flexor side of the left arm)	ncRNA_intronic	POT1-AS1(G)	-0.601505	4.58e-08	Yes
7p22.3	rs1584270455	0.92569	pH(flexor side of the left arm)	intronic	MAD1L1(G),SNORA114(E),ENSG00000286192(E),MRM2(E),ELFN1(E)	0.209148	1.08e-08	Yes
7p22.2	rs117829880	0.95915	firmness(flexor side of the left arm F4)	intronic	SDK1(G)	-1.42769	3.26e-08	Yes
8q22.3	rs188202552	0.98917	brightness by DSM-III	intronic	NCALD(G/E),GRHL2(E),ENSG00000271882(E)	-5.54925	7.27e-09	Yes
8q24.3	rs7834152	0.7057	SELS-Roughness(flexor side of the left arm)	intergenic	PTK2(G),DENND3(G)	-0.163668	3.48e-08	Yes
8q24.3	chr8_143072208_SV_INS	0.624	moisture(left cheek)	exonic	LY6S(G)	-3.38122	2.16e-08	Yes
8p22	rs145048640	0.98917	elasticity(flexor side of the left arm R2)	intergenic	MSR1(G),FGF20(G)	0.0862867	2.67e-08	Yes
8p21.3	rs143169108	0.98425	SP_X(flexor side of the left arm);SP_Y(flexor side of the left arm)	intronic	GFRA2(G)	3.07268	4.02e-09	Yes
8p21.2	rs7833017	0.98917	sebum-skin oil(forehead)	intergenic	BNIP3L(G),PNMA2(G)	-55.8323	1.55e-08	Yes
8p12	rs78222118	0.98031	sebum-skin oil(left cheek)	intronic	NRG1(G)	-31.0394	3.86e-08	Yes
8p23.3	rs190848736	0.98573	a*(right cheek) by front UV-NF	intergenic	ZNF596(G),FAM87A(G)	-2.97701	3.1e-08	Yes
8p11.23	rs1449533737	0.91437	pH(flexor side of the left arm)	intergenic	LINC01605(G/E),ZNF703(G/E),ENSG00000254111(E),LOC105379379(E),LOC105379378(E),ENSG00000254290(E),KCNU1(E)	0.238595	2.77e-12	Yes
8q11.21	rs1804078084	0.94193	pH(flexor side of the left arm);pH(left cheek)	intergenic	UBE2V2(G),LOC101929268(G)	-0.235579	7.04e-09	Yes
8q12.3	rs147554456	0.98671	sebum-skin oil(left cheek)	intergenic	YTHDF3(G),LOC102724612(G)	-40.8474	2.39e-09	Yes
8p23.3	rs12544239	0.98573	SELS-Roughness(flexor side of the left arm)	intronic	ERICH1(G/E),DLGAP2(E),TDRP(E)	-0.612459	3.57e-08	Yes
8p23.1	rs1425882196	0.96998	pH(flexor side of the left arm)	intronic	PRAG1(G)	0.300579	3.77e-08	Yes
9q31.1	rs112424366	0.98819	sebum-skin oil(left cheek)	intergenic	LINC01492(G),LOC101928523(G)	-39.391	3.83e-08	Yes
9q33.2	rs372847957	0.98868	SP_X(flexor side of the left arm)	intergenic	GGTA1(G),DAB2IP(G)	3.57888	5.72e-09	Yes
9q34.2	rs2132659287	0.96703	pH(flexor side of the left arm)	intergenic	RNU6ATAC(G),LINC02247(G)	0.335307	1.79e-10	Yes
9q34.3	rs1833385286	0.91634	transparency_a(flexor side of the left arm)	downstream	SNAPC4(G)	0.00115664	3.29e-08	Yes
9p21.3	rs141419244	0.98425	sebum-skin oil(left cheek)	intergenic	SLC24A2(G/E),MLLT3(G),ACER2(E)	-34.8141	3.33e-08	Yes
Top variants: P-value<5E-8, defined as significant level.
See Supplementary TableS2 for detailed information on previously reported GWAS studies.
EAF: effect allele frequency of top variant Yes by PLINK.
Genomic location: genomic location related to genes annotated using SnpEff or AnnotSV.
Impacting genes: overlapping or nearest genes (G) were annotated using SnpEff or AnnotSV and regulatory element annotation (E) was implemented using GeneHancer database, see details in Methods.

## Sheet: Supplementary Data 7
Table S7. Suggestive significant independent GWAS SV signals for skin trait in 1,016 Chinese individuals.
Locus	Top.variant	EAF	Traits	Genomic location	Notable genes	β(Top trait)	p(Top trait)	reported or unreported
1p36.21	chr1_15509493_SV_DEL	0.97884	sebum-skin oil(forehead)	intronic	CASP9(G/E),CELA2B(E),AGMAT(E)	-31.1205	9.13e-06	reported
1q42.11	chr1_224276934_SV_INS	0.98819	elasticity(flexor side of the left arm R2)	intronic	NVL(G/E),CNIH4(E),DEGS1(E)	0.0709803	6.91e-07	reported
10q21.3	chr10_67728073_SV_INS	0.9877	pH(left cheek)	intronic	CTNNA3(G)	0.265959	9.53e-06	reported
11p15.1	chr11_20174148_SV_DEL	0.8524	dermis density(left cheek)	intergenic	DBX1(G)	-2.21235	2.6e-06	unreported
12q24.33	chr12_130904800_SV_DEL	0.98967	transepidermal water loss(flexor side of the left arm)	intergenic	RAN(G),ADGRAN(G)	-1.69743	3.91e-06	unreported
12p13.1	chr12_13127026_SV_INS	0.595	pH(left cheek)	intronic	FAM234B(G/E),GSG1(E),EMP1(E),ENSG00000255621(E),HEBP1(E),HTR7P1(E)	-0.064443	3.25e-06	reported
12q13.12	chr12_48959091_SV_DEL	0.9877	SP_R(eft cheek),SP_G(left cheek),SP_L*a*b*1(left cheek),SP_X(left cheek),SP_Y(left cheek),brightness(left cheek)	intergenic	ARF3(G)	5.28192	8.36e-07	reported
13q22.3	chr13_76828061_SV_INS	0.97933	a*(right cheek) by front UV-NF	intronic	ENSG00000285572(G)	-2.20633	4.81e-07	unreported
14q32.32	chr14_103109142_SV_DEL	0.7972	SP_Y(flexor side of the left arm)	intronic	EXOC3L4(G/E),ENSG00000288610(E),TNFAIP2(E),ENSG00000259444(E),EIF5(E),MARK3(E),TRAF3(E),BAG5(E),COA8(E),RCOR1(E),XRCC3(E),RD3L€	0.846871	2.45e-06	reported
15q26.3	chr15_101185413_SV_INS	0.97785	SELS-Smoothness(left cheek)	exonic	CHSY1(G/E),LRRK1(E)	-43.5238	6.12e-06	reported
16q22.1	chr16_70051759_SV_DEL	0.93504	pH(left cheek),pH(flexor side of the left arm)	intronic	PDXDC2P-NPIPB14P(G)	0.166429	5.52e-07	reported
19p13.3	chr19_431850_SV_DEL	0.872	epidermis density(flexor side of the left arm)	intronic	SHC2(G)	4.80091	5.68e-06	reported
19p13.3	chr19_433727_SV_DEL	0.969	L*(left cheek by front Standard2)	intronic	SHC2(G)	-1.67402	7.46e-06	reported
19p13.2	chr19_8543633_SV_INS	0.8538	b* by left UV-NF	intronic	MYO1F(G/E),LOC124904633(G),ENSG00000268618(E),ZNF414(E),PRAM1(E),MARCHF2(E),RAB11AB(E)	-1.71379	6.98e-06	reported
2p25.3	chr2_1511152_SV_DEL	0.5974	SP_ITA°(flexor side of the left arm)	intronic	TPO(G/E),PXDN(E)	1.54099	4.72e-06	reported
2p25.3	chr2_3315646_SV_INS	0.94882	R	intronic	EIPR1(G)	5.39534	5.64e-07	reported
2p14	chr2_67097423_SV_DEL	0.97195	TH(flexor side of the left arm)	intronic	LINC01828(G)	0.58801	6.02e-06	reported
20p11.21	chr20_25433512_SV_DEL	0.97884	sebum-skin oil(left cheek)	intronic	GINS1(G)	-27.648	1.1e-06	reported
20q13.33	chr20_61714009_SV_INS	0.8302	transparency_area(flexor side of the left arm)	intronic	CDH4(G)	-2457.1	3.26e-06	unreported
20q13.33	chr20_63364719_SV_DEL	0.98622	melanin(flexor side of the left arm)	intronic	LOC100130587(G)	-32.3849	1.07e-06	unreported
3q13.31	chr3_117050781_SV_DEL	0.7372	skin thickness(flexor side of the left arm),dermis thickness(flexor side of the left arm)	intronic	LOC124909415(G)	37.3276	3.05e-07	unreported
4q28.3	chr4_137168632_SV_DEL	0.7879	a*(left cheek) by front UV-NF	intronic	LINC02511(G)	-0.740581	2.33e-06	reported
4q32.3	chr4_164534270_SV_INS	0.7475	transparency_area(flexor side of the left arm)	intergenic	SMIM31(G)	2072.34	4.54e-06	unreported
4q33	chr4_170572877_SV_INS	0.98967	dermis density%(left cheek)	intergenic	ENSG00000293021(G)	-3.84157	5.06e-06	unreported
4q12	chr4_56685872_SV_INS	0.5974	transepidermal water loss(flexor side of the left arm)	intronic	LOC105377666(G)	0.366553	1.03e-06	unreported
4q21.3	chr4_86837270_SV_INS	0.8027	dermis thickness(flexor side of the left arm)	intronic	SLC10A6(G)	-37.1246	5.21e-06	reported
5q21.3	chr5_108844982_SV_DEL	0.8115	skin density%(flexor side of the left arm),dermis density%(flexor side of the left arm)	intronic	FER(G)	1.78852	5.06e-07	unreported
6q27	chr6_168825750_SV_INS	0.8617	transparency_k(left cheek)	intergenic	TEC(G)	69.7187	2.78e-06	unreported
6q27	chr6_170171847_SV_DEL	0.7692	a*(left cheek by front Standard1)	intronic	ENSG00000230960(G)	0.535076	1.21e-06	reported
6p22.3	chr6_24358838_SV_INS	0.97343	brightness(flexor side of the left arm)	intronic	DCDC2(G/E),KAAG1(E),MRS2(E)	-0.677372	9.63e-06	reported
6q14.1	chr6_76271995_SV_INS	0.7963	epidermis density(left cheek)	intergenic	IMPG1(G)	5.61509	3.28e-06	reported
7p22.1	chr7_5965947_SV_INV	0.97982	a* by right UV-NF,a* by left UV-NF	txStart-txEnd	AIMP2(G/E),ANKRD61(G/E),CYTH3(G/E),DAGLB(G/E),EIF2AK1(G/E),FAM220A(G/E),GRID2IP(G/E),PMS2(G/E),KDELR2(G/E),RAC1(G/E),PMS2CL(G/E),RSPH10B(G/E),RSPH10B2(G/E),SNORA80D(G/E),USP42(G/E),ZDHHC4(G/E),ZNF853(G/E),ZNF316(G/E),ZNF12(G/E),SAGSIN1(G),LOC101927325(G),LOC124901582(G),INTS15(G),LOC124901583(G),SPDYE20P(G),C7orf26(E),CCZ1(E),CCZ1B(E),DQ866756(E),ENSG00000198580(E),ENSG00000202273(E),ENSG00000228…	-2.5233	3.07e-07	reported
8q22.2	chr8_100051623_SV_INS	0.96211	L*(right cheek) by front UV-NF	intronic	RGS22(G)	-4.14819	3.69e-06	reported
8p23.3	chr8_848352_SV_DEL	0.98967	SP_X(flexor side of the left arm),SP_Y(flexor side of the left arm),SP_Z(flexor side of the left arm)	intronic	DLGAP2(G)	3.48614	6.18e-07	reported
9q21.11	chr9_69367614_SV_INS	0.92618	sebum-skin oil(forehead)	intronic	ENTREP1(G)	-18.2004	2.67e-06	unreported
Top variants: P-value<1E-5, defined as significant level.
See Supplementary TableS2 for detailed information on previously reported GWAS studies.
EAF: effect allele frequency of top variant Yes by PLINK.
Genomic location: genomic location related to genes annotated using SnpEff or AnnotSV.
Impacting genes: overlapping or nearest genes (G) were annotated using SnpEff or AnnotSV and regulatory element annotation (E) was implemented using GeneHancer database, see details in Methods.

## Sheet: Supplementary Data 8
Table S8. 145 quantitative skin pigmentation related phenotypes used to run GWAS in 1,106 Chinese individuals.
Phenotype	Instrument	light source or probe
moisture(left cheek)	MPA10	Corneometer CM825
melanin(left cheek)	MPA10	Corneometer CM825
melanin(flexor side of the left arm)	MPA10	Mexameter MX18
protoheme(left cheek)	MPA10	Mexameter MX18
protoheme(flexor side of the left arm)	MPA10	Mexameter MX18
pH(left cheek)	MPA10	Skin-pH-Meter PH905
pH(flexor side of the left arm)	MPA10	Skin-pH-Meter PH905
sebum-skin oil(forehead)	MPA10	Sebumeter SM815
sebum-skin oil(left cheek)	MPA10	Sebumeter SM815
transepidermal water loss(left cheek)	MPA10	Tewameter TM Hex
transepidermal water loss(flexor side of the left arm)	MPA10	Tewameter TM Hex
brightness(left cheek)	MPA10	Glossymeter GL200
brightness(flexor side of the left arm)	MPA10	Glossymeter GL200
TH(left cheek)	MPA10	Skin-Thermometer ST500
SP_R(left cheek)	MPA10	Colorimeter CL440
SP_G(left cheek)	MPA10	Colorimeter CL440
SP_B(left cheek)	MPA10	Colorimeter CL440
SP_L*a*b*1(left cheek)	MPA10	Colorimeter CL440
SP_L*a*b*2(left cheek)	MPA10	Colorimeter CL440
SP_L*a*b*3(left cheek)	MPA10	Colorimeter CL440
SP_X(left cheek)	MPA10	Colorimeter CL440
SP_Y(left cheek)	MPA10	Colorimeter CL440
SP_Z(left cheek)	MPA10	Colorimeter CL440
SP_ITA°(left cheek)	MPA10	Colorimeter CL440
TH(flexor side of the left arm)	MPA10	Skin-Thermometer ST500
SP_R(flexor side of the left arm)	MPA10	Colorimeter CL440
SP_G(flexor side of the left arm)	MPA10	Colorimeter CL440
SP_B(flexor side of the left arm)	MPA10	Colorimeter CL440
SP_L*a*b*1(flexor side of the left arm)	MPA10	Colorimeter CL440
SP_L*a*b*2(flexor side of the left arm)	MPA10	Colorimeter CL440
SP_L*a*b*3(flexor side of the left arm)	MPA10	Colorimeter CL440
SP_X(flexor side of the left arm)	MPA10	Colorimeter CL440
SP_Y(flexor side of the left arm)	MPA10	Colorimeter CL440
SP_Z(flexor side of the left arm)	MPA10	Colorimeter CL440
SP_ITA°(flexor side of the left arm)	MPA10	Colorimeter CL440
ITA°(backpack)	sunlight simulator	/
transparency_a(left cheek)	TLS850	RGB LED source
transparency_k(left cheek)	TLS850	RGB LED source
transparency_area(left cheek)	TLS850	RGB LED source
transparency_a(flexor side of the left arm)	TLS850	RGB LED source
transparency_k(flexor side of the left arm)	TLS850	RGB LED source
transparency_area(flexor side of the left arm)	TLS850	RGB LED source
elasticity(left cheek R2)	MPA580	/
elasticity(flexor side of the left arm R2)	MPA580	/
firmness(left cheek F4)	MPA580	/
firmness(flexor side of the left arm F4)	MPA580	/
SELS-Smoothness(left cheek)	VC 20plus	UVA-light
SELS-Smoothness(flexor side of the left arm)	VC 20plus	UVA-light
SELS-Roughness(left cheek)	VC 20plus	UVA-light
SELS-Roughness(flexor side of the left arm)	VC 20plus	UVA-light
wrinkles(left cheek)	VC 20plus	UVA-light
wrinkles(flexor side of the left arm)	VC 20plus	UVA-light
brightness(left cheek)	CR-2600	/
brightness(flexor side of the left arm)	CR-2600	/
sanguineness(left cheek)	CR-2600	/
sanguineness(flexor side of the left arm)	CR-2600	/
xanthochromia(left cheek)	CR-2600	/
xanthochromia(flexor side of the left arm)	CR-2600	/
ITA°(left cheek)	CR-2600	/
ITA°(flexor side of the left arm)	CR-2600	/
skin thickness(left cheek)	Ultrascan UC 22	/
skin thickness(flexor side of the left arm)	Ultrascan UC 22	/
skin density%(left cheek)	Ultrascan UC 22	/
skin density%(flexor side of the left arm)	Ultrascan UC 22	/
skin density(left cheek)	Ultrascan UC 22	/
skin density(flexor side of the left arm)	Ultrascan UC 22	/
epidermis thickness(left cheek)	Ultrascan UC 22	/
epidermis thickness(flexor side of the left arm)	Ultrascan UC 22	/
epidermis density%(left cheek)	Ultrascan UC 22	/
epidermis density%(flexor side of the left arm)	Ultrascan UC 22	/
epidermis density(left cheek)	Ultrascan UC 22	/
epidermis density(flexor side of the left arm)	Ultrascan UC 22	/
dermis thickness(left cheek)	Ultrascan UC 22	/
dermis thickness(flexor side of the left arm)	Ultrascan UC 22	/
dermis density%(left cheek)	Ultrascan UC 22	/
dermis density%(flexor side of the left arm)	Ultrascan UC 22	/
dermis density(left cheek)	Ultrascan UC 22	/
dermis density(flexor side of the left arm)	Ultrascan UC 22	/
melanin	DSM-III	2 x high-intensity white LEDs
protoheme	DSM-III	2 x high-intensity white LEDs
brightness	DSM-III	2 x high-intensity white LEDs
sanguineness	DSM-III	2 x high-intensity white LEDs
xanthochromia	DSM-III	2 x high-intensity white LEDs
R	DSM-III	2 x high-intensity white LEDs
G	DSM-III	2 x high-intensity white LEDs
B	DSM-III	2 x high-intensity white LEDs
b*(left cheek)	Janus III system	Standard1(front)
L*(left cheek)	Janus III system	Cross-Polarized(front)
b*(right cheek)	Janus III system	Standard2(front)
L*(right cheek)	Janus III system	Standard1(front)
a*(right cheek)	Janus III system	Standard2(front)
L*	Janus III system	UV-NF(right)
a*	Janus III system	Standard1(left)
a*	Janus III system	UV-NF(right)
L*(left cheek)	Janus III system	UV-NF(front)
a*	Janus III system	Parallel-Polarized(left)
L*(right cheek)	Janus III system	UV-NF(front)
a*	Janus III system	Cross-Polarized(right)
b*(left cheek)	Janus III system	Cross-Polarized(front)
L*	Janus III system	Standard1(left)
L*(left cheek)	Janus III system	Standard1(front)
b*(left cheek)	Janus III system	UV-NF(front)
L*(left cheek)	Janus III system	Standard2(front)
b*	Janus III system	UV-NF(left)
L*(left cheek)	Janus III system	Parallel-Polarized(front)
a*	Janus III system	Cross-Polarized(left)
L*	Janus III system	Cross-Polarized(left)
b*(right cheek)	Janus III system	Standard1(front)
a*	Janus III system	Standard2(right)
a*(right cheek)	Janus III system	Cross-Polarized(front)
b*	Janus III system	Cross-Polarized(left)
L*	Janus III system	Standard2(right)
b*	Janus III system	Parallel-Polarized(left)
L*(right cheek)	Janus III system	Parallel-Polarized(front)
L*	Janus III system	Parallel-Polarized(left)
a*	Janus III system	Standard1(right)
a*(left cheek)	Janus III system	UV-NF(front)
b*(right cheek)	Janus III system	Parallel-Polarized(front)
L*	Janus III system	Standard2(left)
a*(left cheek)	Janus III system	Parallel-Polarized(front)
b*(left cheek)	Janus III system	Parallel-Polarized(front)
b*	Janus III system	Standard1(left)
a*(right cheek)	Janus III system	Parallel-Polarized(front)
b*	Janus III system	Parallel-Polarized(right)
a*(left cheek)	Janus III system	Standard2(front)
a*	Janus III system	Standard2(left)
b*(left cheek)	Janus III system	Standard2(front)
b*	Janus III system	UV-NF(right)
L*	Janus III system	Cross-Polarized(right)
a*	Janus III system	UV-NF(left)
L*(right cheek)	Janus III system	Cross-Polarized(front)
b*	Janus III system	Standard2(left)
b*(right cheek)	Janus III system	Cross-Polarized(front)
L*	Janus III system	Parallel-Polarized(right)
b*(right cheek)	Janus III system	UV-NF(front)
L*(left cheek)	Janus III system	Standard2(front)
L*	Janus III system	UV-NF(left)
a*(right cheek)	Janus III system	UV-NF(front)
a*(right cheek)	Janus III system	Standard1(front)
b*	Janus III system	Standard2(right)
a*(left cheek)	Janus III system	Standard1(front)
b*	Janus III system	Cross-Polarized(right)
L*	Janus III system	Standard1(right)
a*(left cheek)	Janus III system	Cross-Polarized(front)
a*	Janus III system	Parallel-Polarized(right)
Instrument: The equipment that was used to measure correspond skin related values. light source or probe: The light source or probe of the equipment that was used during measuring.
/: Information for light source or probe is not available.

## Sheet: Supplementary Data 9
Table S9. Summary of previously reported genetic studies on skin related phenotypes.
PubMed identifier	Reportd date	Reported trait	Initial sample size	Replication sample size	Reported genes
17952075	2007-10-21	Blond vs. brown hair color	2,986 Icelandic ancestry individuals	3,932 European ancestry individuals	MC1R
17952075	2007-10-21	Blue vs. brown eyes	2,986 Icelandic ancestry individuals	3,932 European ancestry individuals	OCA2
17952075	2007-10-21	Blue vs. green eyes	2,986 Icelandic ancestry individuals	3,932 European ancestry individuals	TYR
17952075	2007-10-21	Freckles	2,986 Icelandic ancestry individuals	3,932 European ancestry individuals	SEC5L1, IRF4
17952075	2007-10-21	Red vs non-red hair color	2,986 Icelandic ancestry individuals	3,932 European ancestry individuals	MC1R
17952075	2007-10-21	Skin sensitivity to sun	2,986 Icelandic ancestry individuals	3,932 European ancestry individuals	TYR
17999355	2007-10-15	Skin pigmentation	363 South Asian ancestry low maxL* individuals, 374 South Asian ancestry high maxL* individuals	116 South Asian ancestry low maxL* individuals, 115 South Asian ancestry high maxL* individuals	SLC45A2
18204098	2008-01-20	Systemic lupus erythematosus	1,311 European ancestry cases, 3,340 European ancestry controls	793 European ancestry cases, 857 European ancestry controls	GHR
18204446	2008-01-20	Systemic lupus erythematosus	720 European ancestry female cases, 2,337 European ancestry female controls	1,846 European ancestry female cases, 1,825 European ancestry female controls	KIAA1542
18204447	2008-01-20	Systemic lupus erythematosus	279 European ancestry cases, 515 European ancestry controls	1,757 European ancestry cases, 1,540 European ancestry controls	BANK1
18245381	2008-02-05	Fetal hemoglobin levels	4,305 European ancestry individuals	521 European ancestry individuals	HBB
18252221	2008-01-24	Iris color	925 Erasmus Rucphen individuals, 481 European ancestry females	5,575 European ancestry individuals, 1,292 Erasmus Rucphen individuals	HERC2
18364390	2008-03-25	Psoriasis	318 European ancestry cases, 288 European ancestry controls	2,361 European ancestry cases, 1,927 European ancestry controls	HLA-C
18369459	2008-04-04	Psoriasis	218 European ancestry cases, 519 European ancestry controls	1,153 European ancestry cases, 1,217 European ancestry controls	HLA-C
18483556	2008-05-16	Black vs. blond hair color	2,287 European ancestry female individuals	8,465 European ancestry individuals	/
18483556	2008-05-16	Black vs. red hair color	2,287 European ancestry female individuals	8,465 European ancestry individuals	IRF4
18488026	2008-05-18	Melanoma	864 European ancestry cases, 864 European ancestry controls	1,230 European ancestry cases, 1,251 European ancestry controls	CDC91L1
18488028	2008-05-18	Blond vs. brown hair color	5,130 European ancestry individuals	3,330 European ancestry individuals	TPCN2
18488028	2008-05-18	Blue vs. green eyes	5,130 Icelandic individuals	3,330 European ancestry individuals	TYRP1
18488028	2008-05-18	Freckles	5,130 Icelandic individuals	3,330 European ancestry individuals	ASIP
18488028	2008-05-18	Red vs. non-red hair color	5,130 European ancestry individuals	3,330 European ancestry individuals	ASIP
18488028	2008-05-18	Skin sensitivity to sun	5,130 Icelandic individuals	3,330 European ancestry individuals	ASIP
18849993	2008-10-12	Basal cell carcinoma	930 European ancestry cases, 33,117 European ancestry controls	1,216 European ancestry cases, 2,844 European ancestry controls	RCC2, ARHGEF10L, PADI4, PADI6
19096518	2008-12-19	Glycated hemoglobin levels	14,618 European ancestry females	455 European ancestry individuals	SLC30A8
19151717	2009-01-18	Basal cell carcinoma	1,505 European ancestry cases, 28,890 European ancestry controls	1,060 European ancestry cases, 515 European ancestry controls	TERT, CLPTM1L
19165918	2008-08-01	Systemic lupus erythematosus	431 European ancestry cases, 2,155 European ancestry controls	447 European ancestry trios, 293 trios	/
19169254	2009-01-25	Psoriasis	1,359 European ancestry cases, 1,400 European ancestry controls	5,048 European ancestry cases, 5,041 European ancestry controls	IL12B
19169255	2009-01-25	Psoriasis	1,139 Han Chinese ancestry cases, 1,132 Han Chinese ancestry controls	5,721 Chinese ancestry cases, 7,340 Chinese ancestry controls	MHC
19340012	2009-04-02	Tanning	2,287 European ancestry female individuals	870 European ancestry female individuals	PPARGC1B
19349984	2009-04-06	Atopic dermatitis	939 European ancestry cases, 975 European ancestry controls, 1,097 European ancestry individuals from 270 families	2,637 European ancestry cases, 3,957 European ancestry controls	C11orf30
19578364	2009-07-05	Melanoma	1,539 European ancestry cases, 3,917 European ancestry controls	2,312 European ancestry cases, 1,867 European ancestry controls	/
19578365	2009-07-05	Cutaneous nevi	1,524 European ancestry twins	4,107 European ancestry individuals, 3,131 European ancestry cases, 4,276 European ancestry controls	MTAP
19820698	2009-10-11	Hemoglobin	6,316 European ancestry individuals, 9,685 Indian Asian ancestry individuals	5,187 European ancestry individuals, 6,721 Indian Asian ancestry individuals	HFE
19838193	2009-10-18	Systemic lupus erythematosus	1,047 Han Chinese ancestry cases, 1,205 Han Chinese ancestry controls	3,152 Han Chinese ancestry cases, 7,050 Han Chinese ancestry controls	HLA-DRB1
19838195	2009-11-01	Systemic lupus erythematosus	1,310 European ancestry cases, 7,859 European ancestry controls	1,963 European ancestry cases, 4,329 European ancestry controls	IFIH1
19853236	2009-10-22	Mean corpuscular hemoglobin	2,538 European ancestry individuals, 3,477 individuals	1,543 individuals	HFE
19862010	2009-10-11	Hemoglobin	24,167 European ancestry individuals	9,456 European ancestry individuals	HFE
19862010	2009-10-11	Mean corpuscular hemoglobin	24,167 European ancestry individuals	9,456 European ancestry individuals	BYSL, CCND3
20018918	2009-12-16	Fetal hemoglobin levels	848 Black cases	305 Black cases, 406 Chinese ancestry cases, 113 Thai ancestry cases	BCL11A
20139978	2010-02-07	Hematological and biochemical traits	Up to 14,402 Japanese individuals	/	TMPRSS6
20139978	2010-02-07	Mean corpuscular hemoglobin concentration	14,377 Japanese ancestry individuals	/	HBS1L, MYB
20139978	2010-02-07	Mean corpuscular hemoglobin	Up to 14,362 Japanese ancestry individuals	/	IGDCC4, DPP8, PTPLAD1, C15orf44, SLC24A1, DENND4A
20169177	2010-02-12	Systemic lupus erythematosus	314 Chinese ancestry cases, 1,484 Chinese ancestry controls	2,630 Chinese ancestry cases, 2,155 Chinese ancestry controls, 314 Thai ancestry cases, 519 Thai ancestry controls	WDFY4
20183929	2009-11-19	Beta thalassemia/hemoglobin E disease	235 Thai-Chinese ancestry mild cases, 383 Thai-Chinese ancestry severe cases	52 Indonesian ancestry mild cases, 122 Indonesian ancestry severe cases	HBS1L, MYB
20463881	2010-05-16	Eye color traits	5,951 European ancestry individuals	3,543 European ancestry individuals	NPLOC4, HGS
20585627	2010-06-24	Eye color	9,126 European ancestry individuals	/	SLC45A2
20585627	2010-06-24	Hair color	9,126 European ancestry individuals	/	MC1R
20849430	2010-09-16	Glycated hemoglobin levels	1,782 European ancestry individuals	/	TCF7L2
20858683	2010-09-21	Glycated hemoglobin levels	up to 46,368 European ancestry individuals	/	GCK
20923822	2010-10-05	Radiation response	93 African American human lymphoblastoid cell lines, 89 European ancestry human lymphoblastoid cell lines, 95 Han Chinese ancestry human lymphoblastoid cell lines	/	ADARB2
20953186	2010-10-17	Psoriatic arthritis	572 European ancestry cases, 888 European ancestry controls	Up to 1,761 European ancestry cases, 3,727 European ancestry controls	IL12B
20953188	2010-10-17	Psoriasis	472 European ancestry cases, 1,146 European ancestry controls	2,668, European ancestry cases, 762 French Canadian founder population cases, 2,585 cases, 3,485 European ancestry controls, 994 French Canadian founder population controls, 2,412 controls	IL12B
20953189	2010-10-17	Psoriasis	Up to 1,831 cases, up to 2,546 controls	Up to 4,064 cases, up to 4,685 controls	/
20953190	2010-10-17	Psoriasis	2,178 European ancestry cases, 5,175 European ancestry controls	3,174 European ancestry cases, 5,464 European ancestry controls	IL28RA
21044949	2010-11-02	Systemic lupus erythematosus	612 Chinese ancestry cases, 1,160 Chinese ancestry controls	2,090 Chinese ancestry cases, 1,981 Chinese ancestry controls, 462 Thai ancestry cases, 951 Thai ancestry controls	ELF1
21221126	2011-01-11	Drug-induced Stevens-Johnson syndrome or toxic epidermal necrolysis (SJS/TEN)	up to 72 European ancestry cases, up to 4,251 European ancestry controls	/	ADAM22
21408207	2011-03-03	Systemic lupus erythematosus	811 anti-dsDNA positive European ancestry cases, 906 anti-dsDNA negative European ancestry cases, 4,813 European ancestry controls	/	BLK
21478494	2011-04-09	Cutaneous nevi	9,136 European ancestry individuals	3,581 European ancestry individuals	NID1
21666691	2011-06-13	Atopic dermatitis	1,012 Han Chinese ancestry cases, 1,362 Han Chinese ancestry controls	3,624 Han Chinese ancestry cases, 12,197 Han Chinese ancestry controls, 1,806 European ancestry cases, 3,256 European ancestry controls	FLG
21700618	2011-06-23	Basal cell carcinoma	2,045 European ancestry cases, 6,013 European ancestry controls	1,426 cases, 4,845 controls	UBAC2
21706340	2011-06-26	Melanoma	156 European ancestry cases from 34 high-risk families, 2,150 European ancestry controls	/	/
21801394	2011-07-29	Drug-induced Stevens-Johnson syndrome or toxic epidermal necrolysis (SJS/TEN)	424 European ancestry cases, 1,881 European ancestry controls	/	HCP5
21926416	2011-09-22	Melanoma	1,804 European ancestry cases, 1,026 European ancestry controls	6,483 European and Middle East/North African ancestry cases, 23,324 European and Middle East/North African ancestry controls	ANXA9
21946351	2011-09-25	Basal cell carcinoma	2,121 European ancestry cases, 39,614 European ancestry controls	2,506 European and other ancestry cases, 15,101 European and other ancestry controls	TP53
21983785	2011-10-09	Melanoma	2,168 European ancestry cases, 4,387 European ancestry controls	5,193 European ancestry cases, 15,144 European ancestry controls	ARNT, SETDB1, LASS2, ANXA9, MCL1, CTSK
21983787	2011-10-09	Melanoma	2,804 European ancestry cases, 7,618 European ancestry controls	5,551 European ancestry cases, 7,449 European ancestry controls	MC1R
22170493	2011-12-15	Psoriatic arthritis	535 European ancestry cases, 3,432 European ancestry controls	1,931 European ancestry cases, 6,785 European ancestry controls	REL
22197932	2011-12-25	Atopic dermatitis	5,606 European ancestry cases, 20,565 European ancestry controls	5,419 European ancestry cases, 19,833 European ancestry controls	ACTL9
22290723	2012-01-30	Glycated hemoglobin levels	4,275 Korean ancestry individuals	3,782 Korean ancestry individuals	CDKAL1
22291604	2012-01-26	Systemic lupus erythematosus	891 Japanese ancestry cases, 3,384 Japanese ancestry controls	1,387 Japanese ancestry cases, 28,564 Japanese ancestry controls	AFF1
22482804	2012-04-06	Crohn's disease and psoriasis	2,529 European ancestry psoriasis cases, 2,142 European ancestry Crohn's disease cases, 10,460 European ancestry controls	Up to 3,187 European ancestry psoriasis cases, 4,073 European ancestry Crohn's disease cases, 10,100 European ancestry controls	ZDHHC23
22556244	2012-05-04	Hair color	43 Solomon Islander ancestry blond haired individuals, 42 Solomon Islander ancestry dark haired individuals	/	TYRP1
23042114	2012-10-07	Atopic dermatitis	1,472 Japanese ancestry cases, 7,971 Japanese ancestry controls	1,856 Japanese ancestry cases, 7,021 Japanese ancestry controls	CCDC80, LOC100630917
23053960	2012-10-07	Systemic lupus erythematosus	1,527 European ancestry cases, 3,421 European ancestry controls,	/	STAT4
23118974	2012-10-31	Eye color	175 European ancestry individuals	293 European ancestry individuals	ADCY8/EFR3A
23143594	2012-12-01	Psoriasis	10,588 European ancestry cases, 22,806 European ancestry controls	/	FLJ16341, REL
23263863	2012-12-20	Hematology traits	7,943 African American children, 6,234 European ancestry children	/	Alpha-globin cluster
23263863	2012-12-20	Mean corpuscular hemoglobin	7,943 African American children, 6,234 European ancestry children	/	Alpha-globin cluster
23263863	2012-12-20	Mean corpuscular hemoglobin concentration	7,943 African American children, 6,234 European ancestry children	/	HBE1, HBD, HBBP1, HBG1, HBB
23273568	2012-12-27	Systemic lupus erythematosus	1,656 Han Chinese ancestry cases, 3,394 Han Chinese ancestry controls	3,256 Han Chinese ancestry cases, 5,667 Han Chinese ancestry controls, 453 Thai ancestry cases, 963 Thai ancestry controls	UBE2L3
23303382	2013-01-10	Hematology traits	4,637 East Asian ancestry individuals	4,205 East Asian ancestry individuals	FADS1
23341777	2013-01-17	Squamous cell carcinoma	833 Han Chinese ancestry cases, 3,094 Han Chinese ancestry controls	2,223 Han Chinese ancestry cases, 6,409 Han Chinese ancestry controls	SLC17A8, NR1H4, SCYL2, GAS2L3
23455637	2013-03-03	Melanoma	1,353 European ancestry cases, 3,566 European ancestry controls	12,313 European ancestry cases, Up to 55,667 European ancestry controls	FTO
23548203	2013-04-01	Eye color	3871 European ancestry individuals	2,496 European ancestry individuals	HERC2
23548203	2013-04-01	Hair color	7,070 European ancestry individuals	4,155 European ancestry individuals	KITLG
23548203	2013-04-01	Non-melanoma skin cancer	6,747 European ancestry individuals	2,078 European ancestry individuals	EXOC2, IRF4
23548203	2013-04-01	Sunburns	9,283 European ancestry individuals	4,236 European ancestry individuals	IRF4
23548203	2013-04-01	Tanning	9,678 European ancestry individuals	/	HERC2
23719583	2013-05-26	Adverse response to radiation therapy	79 European, African, Asian, and Hispanic ancestry cases, 241 European, African, Asian, and Hispanic ancestry controls	107 European, African, Asian, and Hispanic ancestry cases, 671 European, African, Asian, and Hispanic ancestry controls	MTNR1B, SLC36A4
23727859	2013-06-02	Atopic dermatitis	2,425 European ancestry cases, 5,449 European ancestry controls	1,951 European ancestry cases, 4,599 European ancestry controls	LCE3A
23740937	2013-06-10	Systemic lupus erythematosus and Systemic sclerosis	up to 2,761 European ancestry systemic sclerosis cases, 769 European ancestry systemic lupus erythematosus cases, 7,381 European ancestry controls	up to 1,578 European ancestry systemic sclerosis cases, 1,727 European ancestry systemic lupus erythematosus cases, 6,893 European ancestry controls	UHRF1BP1
23886662	2013-07-25	Atopic dermatitis	1563 European ancestry cases, 4,054 European ancestry controls	2,286 European ancestry cases, 3,160 European ancestry controls	FLG
24244560	2013-11-07	Glycated hemoglobin levels	3,427 Chinese ancestry individuals, 1,735 Malay ancestry individuals, 1,520 Asian Indian ancestry individuals	/	G6PC3
24403052	2014-01-08	Basal cell carcinoma	4,208 European ancestry cases, 109,408 European ancestry controls	up to 1,480 European ancestry cases, up to 4,610 European ancestry controls	TGM3
24405752	2013-12-04	Glycated hemoglobin levels	4,088 European ancestry non-diabetic elderly individuals	up to 47,822 European ancestry non-diabetic elderly individuals	G6PC2
24487271	2014-03-01	Erythema nodosum in inflammatory bowel disease	103 European ancestry cases, 5,653 European ancestry controls	/	/
24487271	2014-03-01	Pyoderma gangrenosum in inflammatory bowel disease	92 European ancestry cases, 5,664 European ancestry controls	/	APRC2, GPBAR1, HMG1L9
24647736	2014-03-19	Glycated hemoglobin levels	17,290 East Asian ancestry individuals, 1,727 Malay ancestry individuals	up to 13,585 East Asian ancestry individuals	CDKAL1
24777453	2014-04-28	Hemoglobin levels	24,814 European ancestry individuals	6,526 European ancestry individuals	TRF2
24871463	2014-05-29	Systemic lupus erythematosus	725 European ancestry cases, 2,438 European ancestry controls	/	HLA-DRB1
24880342	2014-06-01	Lung cancer	3,442 European ancestry adenocarcinoma cases, 3,275 European ancestry squamous cell carcinoma cases, 4,631 cases, up to 15,861 controls	3,589 European ancestry adenocarcinoma cases, 3,202 European ancestry squamous cell carcinoma cases, 3,455 cases, up to 38,295 controls	CHEK2
24925725	2014-06-12	Lupus nephritis in systemic lupus erythematosus	588 European ancestry cases, 1,412 European ancestry controls	/	F13B, ASPM, CRB1, ZBTB41, CFHR5
24980573	2014-06-30	Melanoma	494 European ancestry cases, 5,628 European ancestry controls	5,383 European ancestry cases, 13,033 European ancestry controls	DOCK3
25042611	2014-07-19	Hemoglobin A2 levels in sickle cell anemia	618 African American cases	173 African American cases, 398 Chinese ancestry individuals	BCL11A
25147954	2014-08-22	melanoma-derived growth regulatory protein levels	up to 653 individuals	up to 317 individuals	SNRPA
25338677	2014-10-23	Interferon alpha levels in systemic lupus erythematosus	88 European ancestry high interferon alpha cases, 322 European ancestry low interferon alpha cases	715 European ancestry cases, 450 African American cases	PNP, TMEM55B, GAFA1
25372704	2014-11-05	Fetal hemoglobin levels in sickle cell anemia	1,213 Tanzanian ancestry cases	321 Afro-Caribbean and Sub-Saharan African cases	BCL11A
25387710	2014-12-01	Skin conductance response amplitude	4,102 European ancestry individuals	/	/
25574825	2015-01-08	Atopic dermatitis	2,079 European ancestry cases, 3,867 European ancestry controls	/	FLG
25574825	2015-01-08	Inflammatory skin disease	2,079 European ancestry atopic dermatitis cases, 4,212 European ancestry psoriasis cases, 11,899 European ancestry controls	/	C11orf30
25574825	2015-01-08	Psoriasis	4,212 European ancestry cases, 8,032 European ancestry controls	/	FUT2
25705849	2015-02-23	Facial pigmentation	2,844 European ancestry individuals	/	MC1R, C16orf55, SPATA33
25827949	2015-05-04	Cutaneous lupus erythematosus	151 European ancestry cases, 1,288 European ancestry controls	219 European ancestry cases, 262 European ancestry controls	PSORS1C1
25854761	2015-04-09	Psoriasis	11,245 Han Chinese ancestry cases, 11,177 Han Chinese ancestry controls	6,369 Han Chinese ancestry cases, 13,969 Han Chinese ancestry controls	ZMIZ1
25855136	2015-04-09	Basal cell carcinoma	4,572 European ancestry cases, 266,358 European ancestry controls	up to 956 European ancestry cases, up to 4,214 European ancestry controls, 526 cases, 528 controls	TP53
25862617	2015-04-10	Systemic lupus erythematosus	1,656 Chinese ancestry cases, 3,394 Chinese ancestry controls	2,152 Chinese ancestry cases, 2,476 Chinese ancestry controls, 460 Thai ancestry cases, 965 Thai ancestry controls	CD80
25865352	2015-04-10	Atopic dermatitis	870 European ancestry cases, 5,293 European ancestry controls	1,383 European ancestry cases, 1,728 European ancestry controls	RNF111
25903422	2015-04-23	Psoriasis	3,496 European ancestry cases, 5,186 European ancestry controls, 1,588 Chinese ancestry cases, 3,546 Chinese ancestry controls	5,134 European ancestry cases, 5,633 European ancestry controls, 5,151 Chinese ancestry cases, 5,152 Chinese ancestry controls	TP63
25939698	2015-05-05	Psoriasis	3,994 European ancestry cases, 7,699 European ancestry controls	6,268 European ancestry cases, 14,172 European ancestry controls, 5,033 cases, 5,707 controls	CARD6
25963972	2015-05-12	Perceived skin darkness	9,316 European ancestry individuals	5,278 European ancestry individuals	HERC2
25963972	2015-05-12	Skin colour saturation	5,857 European ancestry individuals	/	MC1R-R
25963972	2015-05-12	Skin sensitivity to sun	2,668 European ancestry individuals	/	ASIP, RALY
26184321	2015-07-13	Black vs. non-black hair color	196 European ancestry black hair individuals, 6,895 European ancestry non-black hair individuals	/	MC1R
26184321	2015-07-13	Blond vs non-blond hair color	2,888 European ancestry blond hair individuals, 4,203 European ancestry non-blond hair individuals	/	KITLG
26184321	2015-07-13	Brown vs. non-brown hair color	3,826 European ancestry brown hair individuals, 3,265 European ancestry non-brown hair individuals	/	MC1R
26184321	2015-07-13	Light vs. dark hair color	3,069 European ancestry light hair individuals, 4,022 European ancestry dark hair individuals	/	IRF4
26184321	2015-07-13	Red vs non-red hair color	181 European ancestry red hair individuals, 6,910 European ancestry non-red hair individuals	/	MC1R
26237428	2015-08-03	Cutaneous malignant melanoma	12,874 European ancestry cases, 23,203 European ancestry controls	785 European ancestry cases, 791 European ancestry controls, 2,331 cases, 2,415 controls	CDKAL1
26316170	2015-08-28	Systemic lupus erythematosus	661 European ancestry cases, 487 European ancestry controls	4,467 European ancestry cases, 9,114 European ancestry controls	HLA-DQA1
26366553	2015-09-14	Hemoglobin levels	6,602 Sardinian founder individuals	4,131 European ancestry individuals	HBB, HBD, HBBP1, HBG1, HBG2, HBE1
26450422	2015-10-08	Skin and soft tissue Staphylococcus aureus infection	2,130 European ancestry cases, 45,434 European ancestry controls	/	HLA-DRB1
26482879	2015-10-19	Atopic dermatitis	18,900 European ancestry cases, 1,472 Japanese ancestry cases, 422 African American cases, 300 Latino cases, 305 cases, 84,166 European ancestry controls, 7,966 Japanese ancestry controls, 844 African American controls, 1,592 Latino controls, 896 controls	30,588 European ancestry cases, 459 African American cases, 1,012 Chinese ancestry cases, 226,537 European ancestry controls, 729 African American controls, 1,362 Chinese ancestry controls	C1orf51, MRPS21
26502338	2015-10-26	Systemic lupus erythematosus	5,201 European ancestry cases, 9,066 European ancestry controls	2,018 European ancestry cases, 6,925 European ancestry controls	HLA-DQ1
26502338	2015-10-26	Systemic lupus erythematosus	5,201 European ancestry cases, 9,066 European ancestry controls	/	HLA-DQ1
26606652	2015-11-25	Systemic lupus erythematosus	862 Native American ancestry-enriched North American cases, 531 Native American ancestry-enriched South American cases, 1,973 Native American ancestry-enriched North American controls, 344 Native American ancestry-enriched South American controls	/	DSTYK
26626624	2015-11-28	Cutaneous psoriasis	1,363 European ancestry cases, 4,934 European ancestry controls	up to 2,969 European ancestry cases, up to European ancestry 14,384 controls	USP49
26626624	2015-11-28	Psoriasis vulgaris	4,007 European ancestry cases, 4,934 European ancestry controls	up to 9,075 European ancestry cases, up to European ancestry 12,726 controls	CDKAL1
26626624	2015-11-28	Psoriatic arthritis	1,946 European ancestry cases, 4,934 European ancestry controls	up to 2,883 European ancestry cases, up to 14,179 European ancestry controls	JAK2
26663301	2016-05-01	Systemic lupus erythematosus	1,174 Korean ancestry cases, 4,246 Korean ancestry controls	739 Korean ancestry cases, 677 Chinese ancestry cases, 436 Korean ancestry controls, 709 Chinese ancestry controls	PRDX6, TNFSF4
26829030	2016-01-29	Squamous cell carcinoma	6,891 European ancestry cases, 54,566 European ancestry controls	810 European ancestry cases, 5,600 European ancestry controls	HERC2
26908436	2016-02-12	Squamous cell carcinoma	745 European ancestry cases, 12,805 European ancestry controls	531 European ancestry cases, 551 European ancestry controls	SRC
26926045	2016-03-01	Hair color	6,357 Latin American individuals	/	IRF4
26980576	2016-03-15	Response to cyclophosphamide in systemic lupus erythematosus with lupus nephritis	93 Korean ancestry responder cases, 16 Korean ancestry non-responder cases	/	CAMK1D
27022141	2016-03-27	High fetal hemoglobin in sickle cell disease	up to 376 African American cases, up to 360 African American controls	/	BCL11A
27193031	2016-05-18	Systemic lupus erythematosus or rheumatoid arthritis	2,237 European ancestry systemic lupus erythematosus cases, 3,911 European ancestry rheumatoid arthritis cases, 10,398 European ancestry controls	1,957 European ancestry systemic lupus erythematosus cases, 13,641 European ancestry rheumatoid arthritis cases, 36,509 European ancestry controls	BLK
27207532	2016-04-12	Skin fluorescence in type 1 diabetes	1,359 European ancestry cases	/	PTGFR, MGC27382
27327535	2016-06-21	Severity of facial solar lentigines	502 French ancestry individuals	/	USP8P1, HLA-C
27399966	2016-07-11	Systemic lupus erythematosus	1,659 Chinese ancestry cases, 3,398 Chinese ancestry controls, 4,036 European ancestry cases, 6,959 European ancestry controls	3,043 Chinese ancestry cases, 5,074 Chinese ancestry controls, 2,643 European ancestry cases, 9,032 European ancestry controls	STAT4
27539887	2016-08-19	Basal cell carcinoma	12.945 European ancestry cases, 274,252 European ancestry controls	4,242 European ancestry cases, 12,802 European ancestry controls	TYR
27863252	2016-11-17	Hemoglobin concentration	172,925 European ancestry individuals	/	MITF
27863252	2016-11-17	Mean corpuscular hemoglobin	172,332 European ancestry individuals	/	CLCN6
27863252	2016-11-17	Mean corpuscular hemoglobin concentration	172,851 European ancestry individuals	/	ANK1
28011148	2016-12-21	Trans-epidermal water loss	611 Han Chinese ancestry individuals	366 Han Chinese ancestry individuals	FCN1, OLFM1
28017375	2016-12-22	Hemoglobin levels	up to 40,258 European ancestry individuals, 16,128 African American individuals, up to 15,252 East Asian ancestry individuals.	16,389 European and African American individuals	TMPRSS6
28017375	2016-12-22	Mean corpuscular hemoglobin concentration	up to 21,020 European ancestry individuals, up to 3,621 African American individuals, up to 15,062 East Asian individuals.	16,389 European and African American individuals.	/
28017375	2016-12-22	Mean corpuscular hemoglobin	up to 21,020 European ancestry individuals, up to 3,621 African American individuals, up to 15,062 East Asian individuals.	16,389 individuals of European and African American ancestry.	TMPRSS6
28031487	2016-12-28	Mean corpuscular hemoglobin	6,883 European ancestry individuals	/	TMPRSS6
28081215	2017-01-12	Multiple keratinocyte cancers	2,106 European ancestry multiple keratinocyte cancer cases, 2,061 European ancestry single keratinocyte cancer cases, 135 European and unknown ancestry multiple keratinocyte cancer cases, 761 European and unknown ancestry single keratinocyte cancer cases	/	/
28177523	2017-02-22	Basal cell carcinoma	17,187 European ancestry cases, 287,054 European ancestry controls	/	ZNF365
28212542	2017-02-09	Melanoma	4,842 European ancestry cases, 286,565 European ancestry controls	1,804 European ancestry cases, 1,026 European ancestry controls	AGR3
28240269	2017-02-27	Hemoglobin levels	997 European ancestry individuals	338 Greater Middle Eastern (Middle Eastern, North African or Persian), South Asian ancestry, Asian ancestry individuals	/
28240269	2017-02-27	melanoma-derived growth regulatory protein levels	997 European ancestry individuals	338 Greater Middle Eastern (Middle Eastern, North African or Persian), South Asian ancestry, Asian ancestry individuals	/
28300201	2017-03-16	Skin pigmentation	285 Puerto Rican individuals	373 African American individuals	SLC45A2
28453575	2017-04-28	Hemoglobin	12,502 Hispanic/Latino individuals	7,106 Hispanic/Latino individuals	PRKCE
28453575	2017-04-28	Mean corpuscular hemoglobin	12,502 Hispanic/Latino individuals	4,772 Hispanic/Latino individuals	CCND3
28453575	2017-04-28	Mean corpuscular hemoglobin concentration	12,502 Hispanic/Latino individuals	4,772 Hispanic/Latino individuals	KCTD17
28502801	2017-05-11	Skin aging (microtopography measurement)	5,087 individuals	/	ERBB4
28537254	2017-05-24	Psoriasis	Up to 11,988 European ancestry cases, up to 275,335 European ancestry controls	7,044 European ancestry cases, 11,434 European ancestry controls	/
28548082	2017-05-26	Hemoglobin	up to 1,476 Mylopotamos (founder/genetic isolate) individuals, up to 1,737 Pomak (founder/genetic isolate) individuals	/	HBG2, HBE1, AC104389.28
28548082	2017-05-26	Mean corpuscular hemoglobin concentration	up to 1,476 Mylopotamos (founder/genetic isolate) individuals, up to 1,737 Pomak (founder/genetic isolate) individuals	/	TRIM68
28548082	2017-05-26	Mean corpuscular hemoglobin	up to 1,476 Mylopotamos (founder/genetic isolate) individuals, up to 1,737 Pomak (founder/genetic isolate) individuals	/	TRIM68
28714469	2017-07-17	Systemic lupus erythematosus	6,748 European ancestry cases, 11,516 European ancestry controls, 2,970 African American cases, 2,452 African American controls, 1,872 Hispanic cases, 2,016 Hispanic controls	/	NOTCH2
28714469	2017-07-17	Systemic lupus erythematosus	6,748 European ancestry cases, 11,516 European ancestry controls	/	NOTCH2
28781888	2017-03-10	Uveal melanoma	259 European ancestry cases, 401 European ancestry controls	276 French cases, 184 European ancestry controls	TERT, CLPTM1L
28887542	2017-09-08	Glycated hemoglobin levels	5,288 European ancestry women, 4,148 European ancestry men	9,888 European ancestry individuals, 16,013 individuals	RP1- 228P16.4
28898252	2017-09-12	Glycated hemoglobin levels	18,472 East Asian ancestry individuals	/	SLC30A8
28898252	2017-09-12	Glycated hemoglobin levels	7,564 African American individuals	/	SLC30A8
28898252	2017-09-12	Glycated hemoglobin levels	7,572 South Asian ancestry individuals	/	SLC30A8
28898252	2017-09-12	Glycated hemoglobin levels	88,355 European ancestry individuals	/	SLC30A8
29031612	2017-10-12	Psoriasis vulgaris	282 Japanese ancestry cases, 426 Japanese ancestry controls	320 Japanese ancestry cases, 1,622 Japanese ancestry controls	TNIP1
29109912	2017-11-02	Iris color (a* coordinate)	377 East Asian ancestry individuals	/	OCA2
29109912	2017-11-02	Iris color (b* coordinate)	377 East Asian ancestry individuals	/	HK1
29109912	2017-11-02	Iris color (L* coordinate)	377 East Asian ancestry individuals	/	/
29109912	2017-11-02	Iris heterochromicity	377 East Asian ancestry individuals	/	/
29170429	2017-11-23	Glycated hemoglobin levels	7,704 Japanese ancestry individuals	/	TMC6, TMC8
29195075	2017-11-30	Skin pigmentation	216 Sub-Saharan African ancestry individuals	240 Sub-Saharan African ancestry individuals	SLC24A5
29195075	2017-11-30	Tanning	216 Sub-Saharan African ancestry individuals	240 Sub-Saharan African ancestry individuals	/
29403010	2018-02-05	Hemoglobin	108,769 Japanese ancestry individuals	/	DOT1L
29403010	2018-02-05	Hemoglobin A1c levels	42,790 Japanese ancestry individuals	/	HMG20A, LINGO1
29403010	2018-02-05	Mean corpuscular hemoglobin	108,054 Japanese ancestry individuals	/	YDJC
29403010	2018-02-05	Mean corpuscular hemoglobin concentration	108,728 Japanese ancestry individuals	/	SMG5
29483669	2018-02-26	Glycated hemoglobin levels	4,049 individuals	6,006 European ancestry individuals	G6PC2
29494758	2018-03-01	Systemic lupus erythematosus	1,047 Han Chinese ancestry cases, 1,205 Han Chinese ancestry controls	3,509 Han Chinese ancestry cases, 8,246 Han Chinese ancestry controls	KIT
29621232	2018-04-05	Glycated hemoglobin levels	6,943 Chinese ancestry individuals	/	FN3KRP
29662168	2018-04-16	Hair color	290,891 European ancestry individuals	27,865 European ancestry individuals	SLC45A1
29739929	2018-05-08	Non-melanoma skin cancer	5,912 European ancestry cases, 181,740 European ancestry controls	/	/
29844224	2018-05-29	Hemoglobin A1c levels	7,647 European ancestry individuals, 2,104 Black individuals	/	HK1
29848360	2018-05-30	Systemic lupus erythematosus	4,943 European ancestry cases, 8,483 European ancestry controls	/	SMYD3
29875488	2018-06-06	B melanoma antigen 2 levels (BAGE2.6294.11.3)	3,301 European ancestry individuals	/	/
29875488	2018-06-06	Hemoglobin subunit theta-1 levels (HBQ1.7965.25.3)	3,301 European ancestry individuals	/	/
29875488	2018-06-06	Hemoglobin subunit zeta levels (HBZ.6919.3.3)	3,301 European ancestry individuals	/	/
29875488	2018-06-06	Keratinocyte differentiation-associated protein levels (KRTDAP.5739.75.3)	3,301 European ancestry individuals	/	/
29875488	2018-06-06	Melanoma-associated antigen 10 levels (MAGEA10.13610.9.3)	3,301 European ancestry individuals	/	/
29875488	2018-06-06	Melanoma-associated antigen 3 levels (MAGEA3.12576.21.3)	3,301 European ancestry individuals	/	/
29875488	2018-06-06	Melanoma-derived growth regulatory protein levels (MIA.2687.2.1)	3,301 European ancestry individuals	/	/
29895819	2018-06-12	Age spots	3,815 Japanese ancestry female cases, 7,438 Japanese ancestry female controls	/	RAB11FIP2
29895819	2018-06-12	Excessive hairiness	3,830 Japanese ancestry female cases, 7,414 Japanese ancestry female controls	/	GCC2, LIMS1-AS1, LIMS1
29895819	2018-06-12	Excessive sweating	1,245 Japanese ancestry female cases, 3,293 Japanese ancestry female controls	/	ABCC11
29895819	2018-06-12	Freckles	7,148 Japanese ancestry female cases, 4,034 Japanese ancestry female controls	/	RAB11FIP2
29967481	2018-07-02	Childhood onset systemic lupus erythematosus	96 Korean ancestry childhood onset cases, 685 Korean ancestry adult onset cases	/	/
30037793	2018-09-21	Tonsillitis	95 Finnish cases, 504 Finnish controls	/	HLA-C, HLA-B
30166351	2018-08-30	Eye color traits	4,988 Spanish ancestry individuals	/	IRF4
30166351	2018-08-30	Hair morphology traits	4,988 Spanish ancestry individuals	/	HERC2
30166351	2018-08-30	Skin pigmentation traits	4,988 Spanish ancestry individuals	/	IRF4
30188897	2018-09-06	Hemoglobin levels	921 Tibetan ancestry individuals	/	EPAS1
30188897	2018-09-06	Oxygenated hemoglobin levels	920 Tibetan ancestry individuals	/	EPAS1
30315195	2018-10-12	Psoriasis	2,280 cases, 2,002 controls	/	PSORS1C1 x XXbacBPG248L24.13
30429480	2018-11-14	Nevus count	52,506 European ancestry individuals	/	/
30429480	2018-11-14	Nevus count or cutaneous melanoma	52,506 European ancestry individuals, 12,874 European ancestry cases, 23,203 European ancestry controls	/	GPRC5A
30531825	2018-12-10	Blond vs. brown/black hair color	39,397 British ancestry blond hair individuals, 283,920 British ancestry brown or black hair individuals	/	NEK6
30531825	2018-12-10	Brown vs. black hair color	269,394 British ancestry brown hair individuals, 14,526 British ancestry black hair individuals	/	ZNF831
30531825	2018-12-10	Red vs. brown/black hair color	15,731 British ancestry red hair individuals, 283,920 British ancestry brown or black hair individuals	/	TSPAN10
30552173	2018-12-14	Psoriatic arthritis	744 Spanish ancestry cases, 1,454 Spanish ancestry controls	1,430 cases, 1,417 controls	/
30557370	2018-12-17	Severe skin toxicity response to cetuximab in colorectal cancer	36 cases, 246 controls with no or mild skin toxicity	/	ZNF827
30573655	2018-12-20	Systemic seropositive rheumatic diseases (Systemic sclerosis or systemic lupus erythematosus or rheumatoid arthritis or idiopathic inflammatory myopathies)	up to 4,595 European ancestry rheumatoid arthritis cases, up to 3,154 European ancestry systemic lupus erythematosus cases, up to 2,281 European ancestry systemic sclerosis cases, up to 1,674 European ancestry idiopathic inflammatory myopathy cases, 19,704 European ancestry controls	/	KPNA4-ARL14
30576415	2019-08-01	Hematology traits	1,225 Mylopotamos (founder/genetic isolate) individuals	/	MNS1, TEX9
30595370	2018-12-27	Hair color	approximately 452,000 European ancestry individuals	/	/
30595370	2018-12-27	Mean corpuscular hemoglobin	approximately 443,000 European ancestry individuals	/	/
30595370	2018-12-27	Sunburns	approximately 344,000 European ancestry individuals	/	/
30664655	2019-01-21	Eye color	6,236 Latin American individuals	/	OCA2
30664655	2019-01-21	Eye color (brightness)	6,236 Latin American individuals	/	OCA2
30664655	2019-01-21	Eye color (hue)	6,236 Latin American individuals	/	HERC2
30664655	2019-01-21	Eye color (saturation)	6,236 Latin American individuals	/	SLC24A5
30664655	2019-01-21	Hair color	6,236 Latin American individuals	/	GRM5
30664655	2019-01-21	Skin, hair and eye pigmentation (multivariate analysis)	6,236 Latin American individuals	/	HERC2
30664655	2019-01-21	Skin pigmentation	6,236 Latin American individuals	/	OCA2
30674623	2019-01-23	Glycated hemoglobin levels in type 1 diabetes	4,622 Finnish ancestry individuals	up to 3,097 individuals	RXFP2
30895295	2019-03-21	Iris color (a* coordinate)	329 South Asian ancestry individuals	/	/
30895295	2019-03-21	Iris color (b* coordinate)	329 South Asian ancestry individuals	/	/
30895295	2019-03-21	Iris color (L* coordinate)	329 South Asian ancestry individuals	/	/
30895295	2019-03-21	Iris heterochromicity	329 South Asian ancestry individuals	/	CTIF
30895295	2019-03-21	Skin reflectance (Melanin index)	720 South Asian ancestry individuals	/	/
30921485	2019-03-28	Psoriasis	215 Egyptian ancestry cases, 416 Egyptian ancestry controls	321 Egyptian ancestry cases, 253 Egyptian ancestry controls	ARNTL
31080455	2019-04-26	Mean corpuscular hemoglobin	1,625 Sub-Saharan African ancestry individuals	/	ITFG3
31080455	2019-04-26	Mean corpuscular hemoglobin concentration	1,625 Sub-Saharan African ancestry individuals	/	ITFG3
31174203	2019-06-07	Basal cell carcinoma	31,787 European ancestry cases, 619,351 European ancestry controls	/	SCAF1
31174203	2019-06-07	Keratinocyte cancer (MTAG)	at least 18,538 European ancestry cases, at least 340,302 European ancestry controls	/	CTC-537E7.3
31174203	2019-06-07	Squamous cell carcinoma	9,674 European ancestry cases, 625,657 European ancestry controls	/	TRPS1
31213470	2019-06-18	Glycated hemoglobin levels	9,636 Hispanic/Latino individuals	4,777 Hispanic/Latino individuals	IQCJ-SCHIP1
31217584	2019-06-19	Hemoglobin A1c levels	559 African American individuals, 10,408 Hispanic/Latino individuals, 92 Asian ancestry individuals, 4 Native American ancestry individuals, 115 individuals	/	/
31217584	2019-06-19	Mean corpuscular hemoglobin concentration	3,750 African American individuals, 15,522 Hispanic/Latino individuals, 128 Asian ancestry individuals, 20 Native American ancestry individuals, 383 individuals	/	/
31315583	2019-07-17	Skin pigmentation	1,047 Hispanic/Latin American individuals, 684 Cape Verdian individuals, 373 African American individuals	East African ancestry individuals (See Crawford et. al, 2017)	/
31315583	2019-07-17	Skin pigmentation	762 Cuban ancestry individuals	/	/
31315583	2019-07-17	Skin pigmentation (conditioned on rs1426654 and rs35397)	1,047 Hispanic/Latin American individuals, 684 Cape Verdian individuals, 373 African American individuals	/	/
31376382	2019-07-31	Psoriasis	10,668 Chinese ancestry cases, 10,679 Chinese ancestry controls	/	GSTCD
31407831	2019-08-13	Chronic lymphocytic leukemia or systemic lupus erythematosus	2,492 European ancestry chronic lymphocytic leukemia cases, 7,219 European ancestry systemic lupus erythematosus cases, 23,144 European ancestry controls	/	MGAT5
31407831	2019-08-13	Diffuse large B-cell lymphoma or systemic lupus erythematosus	3,617 European ancestry diffuse large B-cell lymphoma cases, 7,219 European ancestry systemic lupus erythematosus cases, 23,428 European ancestry controls	/	KALRN
31407831	2019-08-13	Marginal zone lymphoma or systemic lupus erythematosus	741 European ancestry marginal zone lymphoma cases, 7,219 European ancestry systemic lupus erythematosus cases, 21,982 European ancestry controls	/	IKZF3
31513605	2019-09-12	Subscapular skin fold thickness	8,842 Korean ancestry individuals	/	LOC100131027
31522824	2019-09-06	Skin aging measurement	1,084 Han Chinese ancestry women (>50 years old)	964 European ancestry women	SHC4
31522824	2019-09-06	Skin aging measurement	1,534 Han Chinese ancestry women	964 European ancestry women	SHC4
31605138	2019-09-07	Neuroblastoma or malignant cutaneous melanoma	2,101 European ancestry neuroblastoma cases, 12,874 European ancestry malignant cutaneous melanoma cases, 27,405 European ancestry controls	2,039 European ancestry neuroblastoma cases, 508 European ancestry malignant cutaneous melanoma cases, 3,469 European ancestry controls	ANXA9
31626034	2019-10-11	Choroidal melanoma	438 European ancestry cases, 5,199 European ancestry controls	/	/
31626034	2019-10-11	Disease severity in uveal melanoma (TNM stage 3 or 4 vs TNM stage 1 or 2)	330 European ancestry stage 3 or 4 cases, 255 European ancestry stage 1 or 2 cases	/	/
31626034	2019-10-11	Presence of epithelioid cells in uveal melanoma	285 European ancestry cases, 286 European ancestry controls	/	/
31626034	2019-10-11	Uveal melanoma	590 European ancestry cases, 5,199 European ancestry controls	/	/
31626034	2019-10-11	Uveal melanoma (TNM stage 1 or 2)	330 European ancestry cases, 5,199 European ancestry controls	/	/
31626034	2019-10-11	Uveal melanoma (TNM stage 3 or 4)	255 European ancestry cases, 5,199 European ancestry controls	/	/
31626034	2019-10-11	Uveal melanoma with any chromosomal aberration	417 European ancestry cases, 5,199 European ancestry controls	/	/
31626034	2019-10-11	Uveal melanoma with chromosome 3 loss	253 European ancestry cases, 5,199 European ancestry controls	/	/
31626034	2019-10-11	Uveal melanoma with epithelioid cells	285 European ancestry cases, 5,199 European ancestry controls	/	/
31675503	2019-10-01	Hemoglobin A1c levels	up to 7,526 African ancestry individuals	/	/
31675503	2019-10-01	Mean corpuscular hemoglobin concentration	up to 7,526 African ancestry individuals	/	/
31675503	2019-10-01	Mean corpuscular hemoglobin	up to 7,526 African ancestry individuals	/	/
31834638	2019-12-13	Hemoglobin A1c levels	695 individuals	/	/
31869403	2019-12-23	Hemoglobin levels	14,739 African American individuals, 6,762 African ancestry individuals, 21,686 Hispanic/Latino individuals	7,037 African American individuals	/
31902109	2020-01-04	Hematological and biochemical traits	up to 6,843 Korean ancestry individuals	/	HECTD4
32171239	2020-03-14	Hemoglobin concentration	16,186 African American individuals, 20,692 Hispanic or Latin American individuals, 29,379 European ancestry individuals, 630 Asian ancestry individuals, 601 Native American ancestry individuals, 381 individuals	/	/
32171239	2020-03-14	Hemoglobin concentration	16,186 African American individuals	/	/
32171239	2020-03-14	Hemoglobin concentration	20,692 Hispanic or Latin American individuals	/	/
32171239	2020-03-14	Hemoglobin concentration	29,379 European ancestry individuals	/	/
32171239	2020-03-14	Mean corpuscular hemoglobin	14,693 European ancestry individuals	/	/
32171239	2020-03-14	Mean corpuscular hemoglobin	17,400 Hispanic or Latin American individuals	/	/
32171239	2020-03-14	Mean corpuscular hemoglobin	8,694 African American individuals, 17,400 Hispanic or Latin American individuals, 14,693 European ancestry individuals, 127 Asian ancestry individuals, 20 Native American ancestry individuals, 382 individuals	/	/
32171239	2020-03-14	Mean corpuscular hemoglobin	8,694 African American individuals	/	/
32171239	2020-03-14	Mean corpuscular hemoglobin concentration	16,353 African American individuals, 20,877 Hispanic or Latin American individuals, 29,587 European ancestry individuals, 635 Asian ancestry individuals, 20 Native American ancestry individuals, 384 individuals	/	/
32171239	2020-03-14	Mean corpuscular hemoglobin concentration	16,353 African American individuals	/	/
32171239	2020-03-14	Mean corpuscular hemoglobin concentration	20,877 Hispanic or Latin American individuals	/	/
32171239	2020-03-14	Mean corpuscular hemoglobin concentration	29,587 European ancestry individuals	/	/
32327693	2020-04-23	Hemoglobin levels	684,122 European ancestry individuals	/	ATP2B4
32341527	2020-04-27	Cutaneous malignant melanoma	36,760 European ancestry cases, 375,188 European ancestry controls	/	CCND1
32341527	2020-04-27	Cutaneous melanoma or hair colour	36,760 European ancestry cutaneous melanoma cases, 375,188 European ancestry controls, 352,662 European ancestry individuals	/	TMEM163
32341527	2020-04-27	Nevus count or cutaneous melanoma	36,760 European ancestry cutaneous melanoma cases, 375,188 European ancestry controls, 12,930 European ancestry individuals, 52,847 individuals	/	AL033381.1
32439431	2020-05-19	Atopic dermatitis (moderate to severe)	222 South East Asian ancestry, East Asian ancestry, South Asian ancestry, African American or Afro-Caribbean, European ancestry, Greater Middle Eastern (Middle Eastern, North African or Persian) cases, 2,466 Greater Middle Eastern (Middle Eastern, North African or Persian), Hispanic or Latin American, NR moderate to severe atopic dermatitis cases, 2,466 South East Asian ancestry, East Asian ances…	/	/
32514122	2020-06-08	Atopic dermatitis	2,385 Japanese ancestry cases, 209,651 Japanese ancestry controls	/	/
32558222	2020-06-18	Leukoderma in response to rhododendrol	147 Japanese ancestry cases, 112 Japanese ancestry controls	/	PPFIA3
32771030	2020-08-08	Systemic lupus erythematosus	487 Thai cases, 1,606 Thai controls	405 Thai cases, 1,590 Thai controls	TNFSF4, snoU13
32835660	2020-08-21	Facial pigmentation measurement (polar light)	11,079 Korean women	5,940 Korean women	PPARGC1B
32835660	2020-08-21	Facial pigmentation measurement (UV light)	11,079 Korean women	5,940 Korean women	MFSD12
32887889	2020-09-04	Melanoma	6,777 European ancestry cases, 410,350 European ancestry controls	/	/
32888493	2020-09-01	Hemoglobin concentration	149,861 East Asian ancestry individuals	/	/
32888493	2020-09-01	Hemoglobin concentration	15,133 African American or Afro-Caribbean and African ancestry individuals	/	/
32888493	2020-09-01	Hemoglobin concentration	563,946 European ancestry individuals	/	/
32888493	2020-09-01	Hemoglobin concentration	746,431 African American or Afro-Caribbean, African ancestry, European ancestry, East Asian ancestry, Hispanic or Latin American and South Asian ancestry individuals	/	/
32888493	2020-09-01	Hemoglobin concentration	8,189 South Asian ancestry individuals	/	/
32888493	2020-09-01	Mean corpuscular hemoglobin	119,629 East Asian ancestry individuals	/	/
32888493	2020-09-01	Mean corpuscular hemoglobin	11,974 African American or Afro-Caribbean and African ancestry individuals	/	/
32888493	2020-09-01	Mean corpuscular hemoglobin	3,518 Hispanic or Latin American individuals	/	/
32888493	2020-09-01	Mean corpuscular hemoglobin	486,823 European ancestry individuals	/	/
32888493	2020-09-01	Mean corpuscular hemoglobin	630,125 African American or Afro-Caribbean, African ancestry, European ancestry, East Asian ancestry, Hispanic or Latin American and South Asian ancestry individuals	/	/
32888493	2020-09-01	Mean corpuscular hemoglobin	8,181 South Asian ancestry individuals	/	/
32888493	2020-09-01	Mean corpuscular hemoglobin concentration	126,151 East Asian ancestry individuals	/	/
32888493	2020-09-01	Mean corpuscular hemoglobin concentration	12,766 African American or Afro-Caribbean and African ancestry individuals	/	/
32888493	2020-09-01	Mean corpuscular hemoglobin concentration	3,518 Hispanic or Latin American individuals	/	/
32888493	2020-09-01	Mean corpuscular hemoglobin concentration	491,553 European ancestry individuals	/	/
32888493	2020-09-01	Mean corpuscular hemoglobin concentration	642,173 African American or Afro-Caribbean, African ancestry, European ancestry, East Asian ancestry, Hispanic or Latin American and South Asian ancestry individuals	/	/
32888493	2020-09-01	Mean corpuscular hemoglobin concentration	8,185 South Asian ancestry individuals	/	/
32888494	2020-09-01	Hemoglobin	408,112 British individuals	/	ARHGAP10
32888494	2020-09-01	Mean corpuscular hemoglobin	408,112 British individuals	/	RP1-288H2.4, OR7E47P
32888494	2020-09-01	Mean corpuscular hemoglobin concentration	408,112 British individuals	/	HCAR1, RP11-324E6.6
32902719	2020-09-09	Glycated hemoglobin levels	2,732 Kuwaiti ancestry individuals	/	LOC100288683, RPL32P12
32936915	2020-09-16	Glycated hemoglobin levels	2,704 Malay ancestry individuals	/	/
33203692	2020-11-17	Severe skin toxicity response to cetuximab in stage 3 colon cancer	216 European ancestry cases, 12 African ancestry cases, 9 Asian ancestry cases, 3 Oceanian ancestry cases, 3 cases, 819 European ancestry controls, 74 African ancestry controls, 51 Asian ancestry controls, 4 American Indian ancestry controls, 3 Oceanian ancestry controls, 15 controls	/	/
33272962	2020-12-03	Systemic lupus erythematosus	13,377 East Asian ancestry cases, 194,993 East Asian ancestry controls	/	SYNGR1
33385400	2020-12-29	Psoriasis or type 2 diabetes (trans-disease meta-analysis)	11,024 European ancestry psoriasis cases, 74,124 European ancestry diabetes cases, 840,342 European ancestry controls	/	/
33385400	2020-12-29	Psoriasis or type 2 diabetes (trans-disease meta-analysis)(opposite effect)	11,024 European ancestry psoriasis cases, 74,124 European ancestry diabetes cases, 840,342 European ancestry controls	/	/
33409738	2021-01-07	Response to immune checkpoint inhibitors in melanoma (immune-related adverse events)	43 European ancestry cases, 1 case, 42 European ancestry controls, 1 African ancestry control, 2 controls	/	LOC105377125
33410475	2021-01-01	Breslow thickness in cutaneous melanoma	8,505 European ancestry individuals	/	/
33455090	2021-01-17	Response to tofacitinib treatment in psoriasis (herpes zoster)	56 European ancestry cases, 1,543 European ancestry controls, 10 East Asian ancestry cases, 80 East Asian ancestry controls, 4 Hispanic cases, 245 Hispanic controls	/	UGDH
33455090	2021-01-17	Response to tofacitinib treatment in psoriasis (herpes zoster)(time to event)	56 European ancestry cases, 1,543 European ancestry controls, 10 East Asian ancestry cases, 80 East Asian ancestry controls, 4 Hispanic cases, 245 Hispanic controls	/	VWF
33462484	2021-01-18	Glycated hemoglobin levels	327,177 European ancestry individuals, 4,847 African ancestry individuals, 6,895 South Asian ancestry individuals	/	/
33485957	2021-01-21	COVID-19 or atopic dermatitis (trans-disease meta-analysis)	30,937 COVID-19 cases, 21,000 atopic dermatitis cases, 1,566,815 controls	/	/
33485957	2021-01-21	COVID-19 or psoriasis (trans-disease meta-analysis)	1,678 COVID-19 cases, 11,024 psoriasis cases, 690,971 controls	/	/
33491795	2021-01-25	Declining hemoglobin trajectory in blood donors	1,044 European ancestry cases, 783 European ancestry controls	/	PPP2R2A
33491795	2021-01-25	Hemoglobin levels	2,649 European ancestry individuals	/	KIF25
33493351	2021-01-25	Systemic lupus erythematosus	4,576 European ancestry cases, 8,039 European ancestry controls	/	KLF2
33493351	2021-01-25	Systemic lupus erythematosus	4,734 Chinese ancestry cases, 9,425 Chinese ancestry controls, 4,576 European ancestry cases, 8,039 European ancestry controls	/	KLF2
33493351	2021-01-25	Systemic lupus erythematosus	4,734 Chinese ancestry cases, 9,425 Chinese ancestry controls	/	KLF2
33493351	2021-01-25	Systemic lupus erythematosus	512 Han Chinese ancestry cases, 994 Han Chinese ancestry controls	/	KLF2
33536424	2021-02-03	Systemic lupus erythematosus	4,222 Han Chinese ancestry cases, 8,431 Han Chinese ancestry controls, 4,576 European ancestry cases, 8,039 European ancestry controls	/	CD58
33536424	2021-02-03	Systemic lupus erythematosus	4,222 Han Chinese ancestry cases, 8,431 Han Chinese ancestry controls	/	C1QTNF12
33536424	2021-02-03	Systemic lupus erythematosus	4,576 European ancestry cases, 8,039 European ancestry controls	/	NEMP2, NAB1
33549134	2021-02-06	Basal cell carcinoma	17,416 European ancestry cases, 375,455 European ancestry controls	/	RCC2
33600456	2021-02-18	Skin reflectance (Melanin index)	395 African American individuals	681 African American individuals	SLC45A2
33662382	2021-03-01	Skin and soft tissue infections	6,107 European ancestry cases and 399,239 European ancestry controls	1,657 European ancestry cases and 67,522 European ancestry controls	MAP2
33692100	2021-03-10	Eye color	157,485 European ancestry individuals	35,501 European ancestry individuals, 959 Han Chinese ancestry individuals, 677 Indian ancestry individuals	/
33693786	2021-05-01	Mean corpuscular hemoglobin	5,257 Han Chinese ancestry individuals	3,827 Chinese ancestry individuals	/
33887194	2021-04-21	Hemoglobin	33,325 Amish, White ancestry individuals, 653 Asian ancestry individuals, 14,454 Black individuals, 14,029 ﻿Central American ancestry, ﻿Cuban ancestry, ﻿Dominican ancestry, ﻿Mexican ancestry, ﻿Puerto Rican ancestry, ﻿South American ancestry individuals	/	/
33887194	2021-04-21	Mean corpuscular hemoglobin	20,714 Amish, White ancestry individuals, 447 Asian ancestry individuals, 11,246 Black individuals, 13,834 ﻿Central American ancestry, ﻿Cuban ancestry, ﻿Dominican ancestry, ﻿Mexican ancestry, ﻿Puerto Rican ancestry, ﻿South American ancestry individuals	/	/
33887194	2021-04-21	Mean corpuscular hemoglobin concentration	25,256 Amish, White ancestry individuals, 447 Asian ancestry individuals, 13,112 Black individuals, 13,833 ﻿Central American ancestry, ﻿Cuban ancestry, ﻿Dominican ancestry, ﻿Mexican ancestry, ﻿Puerto Rican ancestry, ﻿South American ancestry individuals	/	/
33959940	2021-05-06	Facial wrinkles (crow's feet)	6,254 Latin American individuals	/	/
33959940	2021-05-06	Facial wrinkles (forehead)	6,254 Latin American individuals	/	/
33959940	2021-05-06	Facial wrinkles (frown lines)	6,254 Latin American individuals	/	/
33959940	2021-05-06	Facial wrinkles (principal components analysis)	6,254 Latin American individuals	/	VAV3
33959940	2021-05-06	Nevus count	6,254 Latin American individuals	/	SLC30A1
34023362	2021-05-20	Sensitive skin	1,192 Han Chinese ancestry females	509 Han Chinese ancestry females	/
34023362	2021-05-20	Sensitive skin	1,872 Han Chinese ancestry individuals	817 Han Chinese ancestry individuals	/
34025683	2021-05-07	Hemoglobin levels in non-alcoholic fatty liver disease x mastiha supplementation interaction	35 European or unknown ancestry mastiha exposed individuals, 52 European or unknown ancestry unexposed individuals	/	GNG5P1
34059833	2021-05-31	Glycated hemoglobin levels	146,806 European ancestry individuals	/	PNKD, TMBIM1
34059833	2021-05-31	Glycated hemoglobin levels	15,248 Hispanic individuals	/	SPTA1
34059833	2021-05-31	Glycated hemoglobin levels	33,307 East Asian ancestry individuals	/	VHLL
34059833	2021-05-31	Glycated hemoglobin levels	4,441 Sub-Saharan African ancestry individuals	/	/
34059833	2021-05-31	Glycated hemoglobin levels	6,647 African American individuals	/	MIR4278
34059833	2021-05-31	Glycated hemoglobin levels	9,525 South Asian ancestry individuals	/	/
34076728	2021-06-02	Systemic lupus erythematosus	1,639 East Asian ancestry cases, 2,410 East Asian ancestry controls	/	/
34116867	2021-06-02	Atopic dermatitis	2,597 Japanese ancestry cases, 110,504 Japanese ancestry controls, 25,685 European ancestry cases, 76,768 European ancestry controls	/	/
34116867	2021-06-02	Atopic dermatitis	2,597 Japanese ancestry cases, 110,504 Japanese ancestry controls	/	/
34127828	2021-06-14	Lupus nephritis in systemic lupus erythematosus	377 European ancestry cases, 714 European ancestry controls	570 Europen ancestry cases, 1,225 European ancestry controls	/
34226706	2021-07-05	Hemoglobin A1c levels	437,749 European ancestry individuals	/	/
34226706	2021-07-05	Hemoglobin levels	445,373 European ancestry individuals	/	/
34226706	2021-07-05	Mean corpuscular hemoglobin concentration	443,081 European ancestry individuals	/	/
34265127	2021-07-15	Iris color	1,108 Japanese ancestry individuals	/	/
34265127	2021-07-15	Pigment spots (darkness)	1,108 Japanese ancestry individuals	/	/
34265127	2021-07-15	Response to cosmetics (uncomfortable frequency)	1,108 Japanese ancestry individuals	/	/
34265127	2021-07-15	Rough skin frequency	1,108 Japanese ancestry individuals	/	/
34265127	2021-07-15	Skin flushing frequency	1,108 Japanese ancestry individuals	/	/
34265127	2021-07-15	Sunburn type	1,108 Japanese ancestry individuals	/	/
34271060	2021-07-13	Lesional skin FLG expression levels in childhood atopic dermatitis	235 Black or unknown ancestry individuals	/	/
34271060	2021-07-13	Non(never)-lesional skin FLG expression levels in childhood atopic dermatitis	240 Black or unknown ancestry individuals	/	/
34290314	2021-07-21	Melanoma	3,122 White British ancestry cases, 271,708 White British ancestry controls	/	/
34290314	2021-07-21	Non-melanoma skin cancer	18,944 White British ancestry cases, 255,886 White British ancestry controls	/	/
34376796	2021-08-11	Glycated hemoglobin levels	9,823 South Asian ancestry individuals	/	/
34424336	2021-08-23	Uveal melanoma	1,142 European ancestry cases, 882 European ancestry controls	/	/
34454985	2021-08-26	Atopic dermatitis	22,474 European ancestry cases, 774,187 European ancestry controls	/	/
34570997	2021-09-24	Skin pigmentation	6,964 Chinese ancestry individuals	1,787 Chinese ancestry individuals, 266 Hispanic or Latin American individuals	/
34594039	2021-09-30	Atopic dermatitis	4,296 East Asian ancestry cases, 163,807 East Asian ancestry controls	/	/
34594039	2021-09-30	Atopic dermatitis	6,224 European ancestry cases, 475,075 European ancestry controls, 4,296 East Asian ancestry cases, 163,807 East Asian ancestry controls	/	/
34594039	2021-09-30	Hemoglobin	152,447 East Asian ancestry individuals	/	/
34594039	2021-09-30	Hemoglobin	350,474 European ancestry individuals, 152,447 East Asian ancestry individuals	/	/
34594039	2021-09-30	Hemoglobin A1c levels	344,182 European ancestry individuals, 71,221 East Asian ancestry individuals	/	/
34594039	2021-09-30	Hemoglobin A1c levels	71,221 East Asian ancestry individuals	/	/
34594039	2021-09-30	Mean corpuscular hemoglobin	128,028 East Asian ancestry individuals	/	/
34594039	2021-09-30	Mean corpuscular hemoglobin	350,472 European ancestry individuals, 128,028 East Asian ancestry individuals	/	/
34594039	2021-09-30	Mean corpuscular hemoglobin concentration	135,482 East Asian ancestry individuals	/	/
34594039	2021-09-30	Mean corpuscular hemoglobin concentration	350,468 European ancestry individuals, 135,482 East Asian ancestry individuals	/	/
34594039	2021-09-30	Psoriasis vulgaris	206 East Asian ancestry cases, 172,289 East Asian ancestry controls	/	/
34594039	2021-09-30	Psoriasis vulgaris	5,072 European ancestry cases, 478,102 European ancestry controls, 206 East Asian ancestry cases, 172,289 East Asian ancestry controls	/	/
34594039	2021-09-30	Skin cancer	154 East Asian ancestry cases, 178,572 East Asian ancestry controls	/	/
34594039	2021-09-30	Skin cancer	25,928 European ancestry cases, 466,275 European ancestry controls, 154 East Asian ancestry cases, 178,572 East Asian ancestry controls	/	/
34594039	2021-09-30	Systemic lupus erythematosus	647 European ancestry cases, 482,264 European ancestry controls, 317 East Asian ancestry cases, 175,937 East Asian ancestry controls	/	/
34648354	2021-11-12	Alpha-hemoglobin-stabilizing protein levels	10,708 European ancestry individuals	/	/
34648354	2021-11-12	B melanoma antigen 2 levels	10,708 European ancestry individuals	/	/
34648354	2021-11-12	B melanoma antigen 3 levels	10,708 European ancestry individuals	/	/
34648354	2021-11-12	Hemoglobin levels	10,708 European ancestry individuals	/	/
34648354	2021-11-12	Hemoglobin subunit beta levels	10,708 European ancestry individuals	/	/
34648354	2021-11-12	Hemoglobin subunit delta levels	10,708 European ancestry individuals	/	/
34648354	2021-11-12	Hemoglobin subunit theta-1 levels	10,708 European ancestry individuals	/	/
34648354	2021-11-12	Hemoglobin subunit zeta levels	10,708 European ancestry individuals	/	/
34648354	2021-11-12	Keratinocyte differentiation-associated protein levels	10,708 European ancestry individuals	/	/
34648354	2021-11-12	Melanoma-associated antigen 10 levels	10,708 European ancestry individuals	/	/
34648354	2021-11-12	Melanoma-associated antigen 3 levels	10,708 European ancestry individuals	/	/
34648354	2021-11-12	Melanoma-associated antigen 5 levels	10,708 European ancestry individuals	/	/
34648354	2021-11-12	Melanoma-associated antigen 6 levels	10,708 European ancestry individuals	/	/
34648354	2021-11-12	Melanoma-associated antigen 8 levels	10,708 European ancestry individuals	/	/
34648354	2021-11-12	Melanoma-associated antigen B10 levels	10,708 European ancestry individuals	/	/
34648354	2021-11-12	melanoma-derived growth regulatory protein levels	10,708 European ancestry individuals	/	/
34662886	2021-10-18	Ease of skin tanning - Get mildly or occasionally tanned (UKB data field 1727)	93,163 European ancestry cases, 329,407 European ancestry controls	/	/
34662886	2021-10-18	Ease of skin tanning - Get moderately tanned (UKB data field 1727)	173,164 European ancestry cases, 249,406 European ancestry controls	/	/
34662886	2021-10-18	Ease of skin tanning - Get very tanned (UKB data field 1727)	89,584 European ancestry cases, 332,986 European ancestry controls	/	/
34662886	2021-10-18	Ease of skin tanning - Never tan only burn (UKB data field 1727)	75,919 European ancestry cases, 346,651 European ancestry controls	/	/
34662886	2021-10-18	ICD10 L40: Psoriasis	4,381 European ancestry cases, 324,671 European ancestry controls	4,001 European ancestry cases, 118,929 European ancestry controls	/
34662886	2021-10-18	ICD10 L40: Psoriasis	5,629 European ancestry cases, 377,623 European ancestry controls	4,001 European ancestry cases, 118,929 European ancestry controls	/
34662886	2021-10-18	Malignant melanoma of skin (UKB data field 40006)	3,349 European ancestry cases, 70,881 European ancestry controls	/	/
34662886	2021-10-18	Psoriasis	5,389 European ancestry cases, 326,365 European ancestry controls	4,001 European ancestry cases, 118,929 European ancestry controls	/
34662886	2021-10-18	Skin colour - Dark olive (UKB data field 1717)	7,210 European ancestry cases, 418,151 European ancestry controls	/	/
34662886	2021-10-18	Skin colour - Fair (UKB data field 1717)	304,034 European ancestry cases, 121,327 European ancestry controls	/	/
34662886	2021-10-18	Skin colour - Light olive (UKB data field 1717)	80,996 European ancestry cases, 344,365 European ancestry controls	/	/
34662886	2021-10-18	Skin colour - Very fair (UKB data field 1717)	35,374 European ancestry cases, 389,987 European ancestry controls	/	/
34724200	2021-11-01	Melanoma x citrus consumption interaction (2df)	1,563 European ancestry cases, 193,296 European ancestry controls	/	/
34737426	2021-11-04	ICD10 D04.7: Carcinoma in situ of skin of lower limb, including hip	430 European ancestry cases, 455,918 European ancestry controls	/	/
34737426	2021-11-04	Melanomas of skin (PheCode 172.11)	2,824 European ancestry cases, 453,524 European ancestry controls	/	/
34737440	2021-11-04	Blond vs. brown/black hair color	12,398 European ancestry individuals	/	/
34737440	2021-11-04	Brown vs. black hair color	10,990 European ancestry individuals	/	/
34737440	2021-11-04	Red vs. brown/black hair color	10,450 European ancestry individuals	/	/
34783190	2021-11-15	Systemic lupus erythematosus	4,734 Chinese ancestry cases, 9,425 Chinese ancestry controls, 835 Thai ancestry cases, 2,995 Thai ancestry controls, 4,576 European ancestry cases, 8,039 European ancestry controls	/	/
34783190	2021-11-15	Systemic lupus erythematosus	4,734 Chinese ancestry cases, 9,425 Chinese ancestry controls, 835 Thai ancestry cases, 2,995 Thai ancestry controls	/	/
34813871	2021-11-20	Cutaneous melanoma (MTAG)	380,287 European ancestry individuals	4,089 European ancestry cases, 11,901 European ancestry controls, 44,848 cases, 1,571,864 controls	/
34813871	2021-11-20	Melanoma	4,089 European ancestry cases, 11,901 European ancestry controls	/	/
34814699	2021-11-24	Hemoglobin levels	1,852 African American or Afro-Caribbean individuals	1,688 African American or Afro-Caribbean, Hispanic or Latin American, Asian ancestry, European ancestry individuals	/
34814699	2021-11-24	melanoma-derived growth regulatory protein levels	1,852 African American or Afro-Caribbean individuals	1,688 African American or Afro-Caribbean, Hispanic or Latin American, Asian ancestry, European ancestry individuals	/
34850884	2021-12-01	Steroid induced osteonecrosis of the femoral head and systemic lupus erythematosus	636 Japanese ancestry cases, 95,588 Japanese ancestry controls	/	/
34850884	2021-12-01	Steroid induced osteonecrosis of the femoral head and systemic lupus erythematosus	784 East Asian ancestry cases, 132,603 East Asian ancestry controls	/	/
34850884	2021-12-01	Steroid induced osteonecrosis of the femoral head in systemic lupus erythematosus	636 Japanese ancestry cases, 683 Japanese ancestry controls	/	/
34927100	2021-11-06	Psoriasis	15,967 European ancestry cases, 28,194 European ancestry controls, 2,590 South Asian ancestry cases, 1,720 South Asian ancestry controls	/	/
34927100	2021-11-06	Psoriasis	15,967 European ancestry cases, 28,194 European ancestry controls	/	/
35121771	2022-02-04	Hemoglobin A1c levels	9,653 Korean ancestry individuals	/	/
35121771	2022-02-04	Hemoglobin levels	9,689 Korean ancestry individuals	/	/
35121771	2022-02-04	Mean corpuscular hemoglobin	9,689 Korean ancestry individuals	/	/
35121771	2022-02-04	Mean corpuscular hemoglobin concentration	9,689 Korean ancestry individuals	/	/
35154085	2022-01-27	Response to ustekinumab in psoriasis (improvement)	310 European ancestry individuals	129 European ancestry individuals	/
35154085	2022-01-27	Response to ustekinumab in psoriasis (improvement)	439 European ancestry individuals	/	/
35167971	2022-02-12	Systemic lupus erythematosus	427 European ancestry cases, 89,699 European ancestry controls	/	/
35168826	2022-01-07	Hemoglobin A1c levels	417,018 European ancestry individuals	/	/
35299963	2022-03-01	Body mass index in prediabetes	451 East Asian ancestry individuals	/	/
35299963	2022-03-01	Fasting plasma glucose in prediabetes	451 East Asian ancestry individuals	/	/
35299963	2022-03-01	Glycated hemoglobin levels in prediabetes	451 East Asian ancestry individuals	/	/
35299963	2022-03-01	Postprandial glucose in prediabetes	451 East Asian ancestry individuals	/	/
35313536	2022-03-11	Facial skin elasticity	730 Korean ancestry individuals	/	/
35313536	2022-03-11	Facial skin gloss	730 Korean ancestry individuals	/	/
35313536	2022-03-11	Facial skin hydration	730 Korean ancestry individuals	/	/
35313536	2022-03-11	Facial skin melanin	730 Korean ancestry individuals	/	/
35421404	2022-04-11	Facial wrinkles (crow's feet)	11,079 Korean ancestry individuals	5,940 Korean ancestry individuals	/
35507331	2022-05-04	Psoriatic arthritis	5,065 European ancestry cases, 21,286 European ancestry controls	/	/
35507331	2022-05-04	Psoriatic arthritis vs Cutaneous psoriasis	4,340 European ancestry psoriatic arthritis cases, 6,431 European ancestry cutaneous arthritis cases	/	/
35626014	2022-05-13	Survival in melanoma	556 European ancestry individuals	/	/
35810165	2022-07-09	Glycated hemoglobin levels	1,988 East Asian ancestry individuals	/	/
35810165	2022-07-09	Glycated hemoglobin levels	5,694 African ancestry individuals	/	/
35810165	2022-07-09	Glycated hemoglobin levels	6,036 South Asian ancestry individuals	/	/
35870639	2022-07-21	Hemoglobin subunit beta level in Chronic kidney disease with hypertension and no diabetes (17137_160)	466 African American individuals	/	/
35870639	2022-07-21	Hemoglobin subunit theta-1 level in Chronic kidney disease with hypertension and no diabetes (7965_25)	466 African American individuals	/	/
35870639	2022-07-21	Hemoglobin subunit zeta level in Chronic kidney disease with hypertension and no diabetes (6919_3)	466 African American individuals	/	/
35870639	2022-07-21	Melanoma-derived growth regulatory protein level in Chronic kidney disease with hypertension and no diabetes (2687_2)	466 African American individuals	/	/
35870639	2022-07-21	Preferentially expressed antigen of melanoma level in Chronic kidney disease with hypertension and no diabetes (25951_17)	466 African American individuals	/	/
35888748	2022-07-06	Melanin levels	998 Sub-Saharan African ancestry individuals	/	/
35945964	2022-08-03	Hemoglobin	1,005 Han Chinese ancestry individuals	2,047 Han Chinese ancestry individuals	/
35964923	2022-08-11	Hemoglobin concentration	18,685 Han Chinese ancestry females	23,009 Han Chinese ancestry females	/
35964923	2022-08-11	Hemoglobin concentration	46,904 European ancestry males	80,822 European ancestry males	/
35964923	2022-08-11	Hemoglobin concentration	52,141 European ancestry females	89,584 European ancestry females	/
35964923	2022-08-11	Hemoglobin concentration	8,550 Han Chinese ancestry males	10,274 Han Chinese ancestry males	/
36035146	2022-08-12	Freckles	1,548 Chinese ancestry cases, 5,031 Chinese ancestry controls	392 Chinese ancestry cases, 1,280 Chinese ancestry controls	/
36064556	2022-09-05	Melanoma specific survival	10,982 European ancestry individuals	1,947 European ancestry individuals	/
36085083	2022-09-09	Skin cancer	4,583 European American ancestry cases, 17,603 European American ancestry controls	/	/
36168886	2022-09-28	Hemoglobin levels	2,935 Qatari ancestry individuals	/	/
36168886	2022-09-28	melanoma-derived growth regulatory protein levels	2,935 Qatari ancestry individuals	/	/
36261456	2022-10-19	Univariate microbial feature (asv: asv002) at the forehead (sebaceous skin)	597 German ancestry individuals	/	/
36261456	2022-10-19	Univariate microbial feature (asv: asv004) at the forehead (sebaceous skin)	597 German ancestry individuals	/	/
36261456	2022-10-19	Univariate microbial feature (asv: asv006) at the antecubital fossa (moist skin)	597 German ancestry individuals	/	/
36261456	2022-10-19	Univariate microbial feature (asv: asv013) at the antecubital fossa (moist skin)	597 German ancestry individuals	/	/
36261456	2022-10-19	Univariate microbial feature (asv: asv013) at the dorsal forearm (dry skin)	597 German ancestry individuals	/	/
36261456	2022-10-19	Univariate microbial feature (asv: asv021) at the antecubital fossa (moist skin)	597 German ancestry individuals	/	/
36261456	2022-10-19	Univariate microbial feature (asv: asv070) at the antecubital fossa (moist skin)	597 German ancestry individuals	/	/
36261456	2022-10-19	Univariate microbial feature (asv: asv086) at the dorsal forearm (dry skin)	597 German ancestry individuals	/	/
36261456	2022-10-19	Univariate microbial feature (asv: asv093) at the forehead (sebaceous skin)	597 German ancestry individuals	/	/
36261456	2022-10-19	Univariate microbial feature (class: gammaproteobacteria) at the antecubital fossa (moist skin)	597 German ancestry individuals	/	/
36261456	2022-10-19	Univariate microbial feature (family: clostridiales) at the incertae (moist skin)	597 German ancestry individuals	/	/
36261456	2022-10-19	Univariate microbial feature (family: rhodobacteraceae) at the antecubital fossa (moist skin)	597 German ancestry individuals	/	/
36261456	2022-10-19	Univariate microbial feature (family: streptococcaceae) at the antecubital fossa (moist skin)	597 German ancestry individuals	/	/
36261456	2022-10-19	Univariate microbial feature (genus: acinetobacter) at the antecubital fossa (moist skin)	597 German ancestry individuals	/	/
36261456	2022-10-19	Univariate microbial feature (genus: anaerococcus) at the dorsal forearm (dry skin)	597 German ancestry individuals	/	/
36261456	2022-10-19	Univariate microbial feature (genus: micrococcus) at the dorsal forearm (dry skin)	597 German ancestry individuals	/	/
36261456	2022-10-19	Univariate microbial feature (genus: paracoccus) at the dorsal forearm (dry skin)	597 German ancestry individuals	/	/
36261456	2022-10-19	Univariate microbial feature (genus: staphylococcus) at the forehead (sebaceous skin)	597 German ancestry individuals	/	/
36261456	2022-10-19	Univariate microbial feature (order: bacteroidales) at the dorsal forearm (dry skin)	597 German ancestry individuals	/	/
36261456	2022-10-19	Univariate microbial feature (order: burkholderiales) at the antecubital fossa (moist skin)	597 German ancestry individuals	/	/
36261456	2022-10-19	Univariate microbial feature (order: lactobacillales) at the antecubital fossa (moist skin)	597 German ancestry individuals	/	/
36275661	2022-10-03	Lupus nephritis in systemic lupus erythematosus	592 Han Chinese ancestry cases, 453 Han Chinese ancestry controls	188 cases, 171 controls	/
36323703	2022-11-02	Psoriasis or coronary artery disease	11,024 psoriasis cases, 60,801 coronary artery disease cases, 139,840 controls	/	/
36324510	2022-10-17	Systemic lupus erythematosus	458 Egyptian ancestry cases, 769 Egyptian ancestry controls	/	/
36327221	2022-11-03	Severe COVID-19 or systemic lupus erythematosus	6,956 European ancestry severe COVID-19 cases, 1,823 severe COVID-19 cases, 9,302 European ancestry SLE cases, 1,024,729 European ancestry controls, 328,311 controls	/	/
36327221	2022-11-03	Severe COVID-19 or systemic lupus erythematosus (inverse variance)	6,956 European ancestry severe COVID-19 cases, 1,823 severe COVID-19 cases, 9,302 European ancestry SLE cases, 1,024,729 European ancestry controls, 328,311 controls	/	/
36329257	2022-11-03	Glycated hemoglobin HbA1c levels	76,171 Taiwanese ancestry individuals	/	/
36329257	2022-11-03	Hemoglobin levels	76,354 Taiwanese ancestry individuals	/	/
36333282	2022-11-04	Hemoglobin A1c levels	288,127 East Asian ancestry individuals	/	/
36496446	2022-12-10	Basal cell carcinoma (MTAG)	20,791 European ancestry cases, 286,893 European ancestry controls	251,963 European ancestry cases, 2,271,667 European ancestry controls	/
36496446	2022-12-10	Squamous cell carcinoma (MTAG)	7,402 European ancestry cases, 286,892 European ancestry controls	134,700 European ancestry cases, 2,394,699 European ancestry controls	/
36536295	2022-12-19	Skin autofluorescence	27,254 European ancestry individuals	/	/
36536295	2022-12-19	Skin reflectance	27,254 European ancestry individuals	/	/
36651668	2023-01-18	Osteonecrosis in systemic lupus erythematosus	12 European ancestry cases, 293 European ancestry controls, 16 East Asian ancestry cases, 224 East Asian ancestry controls, 17 African ancestry cases, 106 African ancestry controls, 12 South Asian ancestry cases, 77 South Asian ancestry controls, 2 Amerindian ancestry cases, 23 Amerindian ancestry controls, 12 admixed ancestry cases, 146 admixed ancestry controls	/	/
36651668	2023-01-18	Time to osteonecrosis in systemic lupus erythematosus	305 European ancestry individuals, 240 East Asian ancestry individuals, 123 African ancestry individuals, 89 South Asian ancestry individuals, 25 Amerindian ancestry individuals, 158 admixed ancestry individuals	/	/
36672889	2023-01-05	Blond vs. brown/black hair color	243 Iberian ancestry cases, 4,702 Iberian ancestry controls	/	/
36672889	2023-01-05	Brown vs. black hair color	3,750 Iberian ancestry cases, 952 Iberian ancestry controls	/	/
36672889	2023-01-05	Ease of skin tanning	4,973 Iberian ancestry individuals	/	/
36672889	2023-01-05	Ease of sunburn	4,985 Iberian ancestry individuals	/	/
36672889	2023-01-05	Eye color	4,987 Iberian ancestry individuals	/	/
36672889	2023-01-05	Freckles	4,984 Iberian ancestry individuals	/	/
36672889	2023-01-05	Red vs non-red hair color	34 Iberian ancestry cases, 4,945 Iberian ancestry controls	/	/
36672889	2023-01-05	Skin color	4,985 Iberian ancestry individuals	/	/
36672889	2023-01-05	Skin color (Fitzpatrick scale)	4,933 Iberian ancestry individuals	/	/
36672889	2023-01-05	Skin phototype score	4,933 Iberian ancestry individuals	/	/
36750564	2023-02-07	Systemic lupus erythematosus (MTAG)	at least 5,877 East Asian ancestry cases, at least 188,588 East Asian ancestry controls, at least 14,355 European ancestry cases, at least 505,956 European ancestry controls, at least 1,393 admixed American ancestry cases, at least 2,327 admixed American ancestry controls (MTAG boosted by autoimmune diseases samples)	/	/
36762574	2023-02-10	COVID-19 hospitalization or systemic lupus erythematosus (MTAG)	32,519 European ancestry COVID-19 hospitalization cases, 7,219 European ancestry SLE cases, 2,078,796 European ancestry controls	/	/
36762574	2023-02-10	COVID-19 infection or systemic lupus erythematosus (MTAG)	122,616 European ancestry COVID-19 infection cases, 7,219 European ancestry SLE cases, 2,491,231 European ancestry controls	/	/
36762574	2023-02-10	Severe COVID-19 or systemic lupus erythematosus (MTAG)	13,769 European ancestry severe COVID-19 cases, 7,219 European ancestry SLE cases, 1,088,433 European ancestry controls	/	/
36777999	2022-10-05	Hemoglobin A1c levels	251,000 East Asian ancestry individuals	/	/
36777999	2022-10-05	Hemoglobin A1c levels	38,288 Korean ancestry individuals	/	/
36777999	2022-10-05	Hemoglobin levels	251,000 East Asian ancestry individuals	/	/
36777999	2022-10-05	Hemoglobin levels	70,643 Korean ancestry individuals	/	/
36804406	2023-02-15	Paradoxical eczema in biologic-treated plaque psoriasis	88 European ancestry cases, 3,124 European ancestry controls	/	/
36804966	2023-02-16	Generalized pustular psoriasis	161 Chinese Han ancestry cases, 364 Chinese Han ancestry controls	60 Chinese Han ancestry cases, 100 Chinese Han ancestry controls	/
37090135	2023-01-27	Glycated hemoglobin HbA1c levels	4,911 Japanese ancestry individuals	48,694 Japanese ancestry individuals	/
37271218	2023-06-02	Erythema nodosum in Behcet's disease	233 cases, 203 controls	/	/
37294081	2023-06-09	Skin pigmentation	358 Kalinago ancestry individuals	/	/
37794016	2023-10-04	Atopic dermatitis	60,653 European ancestry cases, 804,329 European ancestry controls, 368 Latino cases, 3,976 Latino controls, 863 mixed ancestry cases, 1,273 mixed ancestry controls, 2,385 Japanese ancestry cases, 209,651 Japanese ancestry controls, 838 African American cases, 2,058 African American controls	387,407 European ancestry cases, 2,517,257 European ancestry controls, 25,813 African ancestry cases, 148,202 African ancestry controls, 58,909 Latino cases, 466,439 Latino controls	/
37794016	2023-10-04	Atopic dermatitis	60,653 European ancestry cases, 804,329 European ancestry controls	387,407 European ancestry cases, 2,517,257 European ancestry controls	/
38018286	2023-11-28	Deferral due to hypohemoglobinemia in blood donors	6,714 Finnish (founder/genetic isolate) cases, 21,189 Finnish (founder/genetic isolate) controls	/	/
38116116	2023-11-16	Hemoglobin	92,615 Taiwanese ancestry individuals	/	/
38116116	2023-11-16	Hemoglobin A1c levels	92,615 Taiwanese ancestry individuals	/	/
38182794	2024-01-05	Basal cell carcinoma	49,905 European ancestry cases, 752,392 European ancestry controls, 626 Hispanic or Latin American cases, 9,842 Hispanic or Latin American controls	/	/
38182794	2024-01-05	Basal cell carcinoma	49,905 European ancestry cases, 752,392 European ancestry controls	/	/
38182794	2024-01-05	Basal cell carcinoma	626 Hispanic or Latin American cases, 9,842 Hispanic or Latin American controls	/	/
38626723	2024-01-01	Mean corpuscular hemoglobin	1,982 Korean ancestry individuals	/	/
38663478	2024-04-23	Atopic dermatitis	35,156 European ancestry cases, 846,868 European ancestry controls, 2,385 Japanese ancestry cases, 209,651 Japanese ancestry controls	/	/
/: No information
